1 The DEAD-box RNA helicase Ded1 from yeast is associated with the signal recognition  
2 particle (SRP), and its enzymatic activity is regulated by SRP21.

3

4 Hilal Yeter-Alat<sup>1,2</sup>, Naïma Belgareh-Touzé<sup>3</sup>, Emmeline Huvelle<sup>1,2</sup>, Molka Mokdadi<sup>1,2,4,5</sup>,  
5 Josette Banroques<sup>1,2</sup>, and N. Kyle Tanner<sup>1,2\*</sup>

6

7 <sup>1</sup> Expression Génétique Microbienne, UMR8261 CNRS, Université de Paris, Institut de  
8 Biologie Physico-Chimique, 13 rue Pierre et Marie Curie, 75005 Paris, France

9 <sup>2</sup> PSL Research University, 75005 Paris, France

10 <sup>3</sup> Laboratoire de Biologie Moléculaire et Cellulaire des Eucaryotes, UMR8226 CNRS,  
11 Sorbonne Université, Institut de Biologie Physico-Chimique, 13 rue Pierre et Marie Curie,  
12 75005 Paris, France

13 <sup>4</sup> Laboratory of Molecular Epidemiology and Experimental Pathology, LR16IPT04, Institut  
14 Pasteur de Tunis, Université de Tunis El Manar, Tunisia

15 <sup>5</sup> Institut National des Sciences Appliquées et Technologies, Université de Carthage, Tunis,  
16 Tunisia

17

18 \*To whom correspondence should be addressed. Tel: +33 1 58 41 52 37; Fax +33 1 58 41 50  
19 25; Email: [kyle.tanner@ibpc.fr](mailto:kyle.tanner@ibpc.fr)

20

21 Keywords: DDX3, SCR1, translocon, ATPase, Sec61

22

23 Abbreviations: BSA, bovine serum albumin; DTT, 1,4-dithiothreitol; EDTA,  
24 ethylenediaminetetraacetate; EMSA, electrophoretic mobility-shift assays; ER, endoplasmic  
25 reticulum; 5-FOA, 5-fluoroorotic acid; GFP, green fluorescent protein; IgG, immunoglobulin

26 G; NI-NTA, nickel-nitrilotriacetic acid; PAR-CLIP, photoactivable-ribonucleoside-enhanced-  
27 crosslinking-and-immunoprecipitation; RNC, ribosome nascent-chain complex; PAR-CLIP,  
28 photoactivable-ribonucleoside-enhanced-crosslinking-and-immunoprecipitation; RT-PCR,  
29 reverse-transcriptase polymerase chain reaction; SCR1, Small Cytoplasmic RNA 1; TCA,  
30 trichloroacetic acid; SDS-PAGE, sodium dodecyl sulfate polyacrylamide gel electrophoresis;  
31 SF2, superfamily 2; SRP, signal recognition particle; SR, SRP receptor; Tris-base,  
32 tris(hydroxymethyl)aminomethane; YPD, yeast extract, peptone, dextrose  
33

34 **ABSTRACT**

35 The DEAD-box RNA helicase Ded1 is an essential yeast protein involved in translation  
36 initiation. It belongs to the DDX3 subfamily of proteins implicated in developmental and cell-  
37 cycle regulation. *In vitro*, the purified Ded1 protein is an ATP-dependent RNA binding  
38 protein and an RNA-dependent ATPase, but it lacks RNA substrate specificity and enzymatic  
39 regulation. Here we demonstrate by yeast genetics, *in situ* localization and *in vitro*  
40 biochemical approaches that Ded1 is associated with, and regulated by, the signal recognition  
41 particle (SRP), which is a universally conserved ribonucleoprotein complex required for the  
42 co-translational translocation of polypeptides into the endoplasmic reticulum lumen and  
43 membrane. Ded1 is physically associated with SRP components *in vivo* and *in vitro*. Ded1 is  
44 genetically linked with SRP proteins. Finally, the enzymatic activity of Ded1 is inhibited by  
45 SRP21 with SCR1 RNA. We propose a model where Ded1 actively participates in the  
46 translocation of proteins during translation. Our results open a new comprehension of the  
47 cellular role of Ded1 during translation.

48 **INTRODUCTION**

49 The DEAD-box family of RNA helicases are ubiquitous proteins found in all three kingdoms  
50 of life, and they are implicated in all processes involving RNA, from transcription, splicing,  
51 ribosomal biogenesis, RNA export, translation to RNA decay [reviewed by (1-3)]. They  
52 belong to the DExD/H superfamily 2 (SF2) of putative RNA and DNA helicases that contain  
53 catalytic cores consisting of two, linked, RecA-like domains containing conserved motifs  
54 associated with ligand binding and NTPase activity, where the majority of the proteins are  
55 ATPases. In addition, they often contain highly variable amino- and carboxyl-terminal  
56 domains [reviewed by (4,5)]. The DEAD-box proteins are ATP-dependent RNA binding  
57 proteins and RNA-dependent ATPases that have been shown to remodel RNA and

58 ribonucleoprotein (RNP) complexes and to unwind short RNA duplexes *in vitro*, but they are  
59 not processive, and they generally have shown little or no substrate specificity (1-3).

60 However, recent single-molecule studies of the DEAD-box protein Ded1 indicate that these  
61 properties may be secondary to their ability to form ATP-dependent clamps on RNA (6).

62 A number of crystal structures of DEAD-box proteins have been solved in the  
63 presence and absence of ligands [reviewed by (7)]. In the absence of ATP, the two RecA-like  
64 domains are unconstrained ("open" conformation) and the proteins have low affinity for  
65 RNA. In the presence of ATP, the two RecA-like domains are highly constrained ("closed"  
66 conformation) and have a high affinity for the RNA. RecA-like domain 2 binds the 5' end of  
67 the RNA as a single strand in the form of an A helix. In contrast, RecA-like domain 1 binds  
68 the 3' end of the RNA with a kink as a result of steric hindrance from residues from motifs Ib  
69 and GG that is incompatible with a duplex. This is considered the mechanism for the duplex  
70 unwinding activity, but it also effectively locks the protein onto the RNA and prevents  
71 sliding. Indeed, Ded1 in the presence of the nonhydrolyzable ATP analog ADP-BeF<sub>x</sub> forms  
72 long-lived complexes on RNA *in vitro* (8).

73 Ded1 is a budding-yeast DEAD-box protein that is the functional homolog of  
74 mammalian DDX3 [reviewed by (9-12)]. It is an essential gene in *Saccharomyces cerevisiae*  
75 that can be rescued by the expression of its orthologs from other eukaryotes, including human  
76 DDX3 [(13) and references therein]. Thus, the functional activity of Ded1 is conserved  
77 throughout eukaryotes. Ded1 is considered a general translation-initiation factor that is  
78 important for 43S ribosome scanning to the initiation codon and formation of the 48S  
79 complex at the AUG codon [(14-16) and references therein]. We have shown that Ded1 is a  
80 cap-associated factor that actively shuttles between the nucleus and cytoplasm using both the  
81 XpoI/Crm1 and Mex67/TAP nuclear pore complexes (13). Moreover, it interacts with both  
82 the nuclear and cytoplasmic 3' polyA-binding proteins Nab2 and Pab1, respectively. We

83 found that these cap-associated factors stimulate the RNA-dependent ATPase activity of  
84 Ded1 (13). The activity of Ded1 is also modulated by Gle1 and by the Xpo1-Ran[GTP]  
85 complex (13,17,18). Other work has shown that Ded1 is sequestered in cytoplasmic foci (P-  
86 bodies or stress granules) with translation inactive mRNAs during conditions of stress  
87 [reviewed by (19-22)]. Human DDX3 has similar properties [reviewed by (23)].

88 We are interested in better understanding the role of Ded1 in the cell. To this end, we  
89 used a modified photoactivable-ribonucleoside-enhanced-crosslinking-and-  
90 immunoprecipitation (PAR-CLIP) technique to identify RNA substrates of Ded1 *in vivo*  
91 (24,25). We identified the Small Cytoplasmic RNA 1 (SCR1) as a major noncoding RNA that  
92 crosslinked to Ded1. SCR1 is the RNA component of the signal recognition particle (SRP)  
93 that is important for the co-translational translocation of polypeptides into the lumen and  
94 membrane of the endoplasmic reticulum [ER; reviewed by (26-29)]. SRP-dependent  
95 translation is conserved across all organisms, from prokaryotes to eukaryotes, including a  
96 highly reduced version for chloroplasts (30-32). It seemed possible that Ded1 was implicated  
97 in SRP-dependent translation.

98 SRP-dependent translation is a complicated and multi-step process that is still  
99 incompletely understood and that involves a number of still controversial elements. In  
100 eukaryotes, the SRP consists of the noncoding RNA (7S or 7SL in metazoans) and six SRP  
101 proteins (SRP9, SRP14, SRP19, SRP54, SRP68 and SRP72). The SRP RNA consists of two  
102 functional elements called the Alu and S domains (33,34). The yeast SRP complex consists of  
103 the SCR1 RNA and the equivalent proteins except Sec65 substitutes for the smaller SRP19  
104 and the novel SRP21 protein replaces SRP9 [reviewed by (35)]. Moreover, in yeast, SRP14  
105 forms a homodimer on the Alu domain of SCR1, which is in contrast to the heterodimer of  
106 SRP14-SRP9 in metazoans (35-37). The role of the yeast SRP21 protein is unclear, although  
107 it is considered the structural homolog of SRP9 (38). SRP54 and Sec65 interact with the

108 extremity of the S domain of SCR1, and SRP68 and SRP72 interact at the junction between  
109 the Alu and S domains (27,35). Yeast lacks the "classical" structure of the Alu domain that  
110 includes helices 3 and 4, and it contains additional hairpins between the Alu and S domains; it  
111 is about 75% bigger (33,34). The structure and role of these additional hairpins are largely  
112 unknown. Eukaryotes lack helix 1 that is found in prokaryotes.

113         In the classical interpretation, the SRP associates with the ribosome during translation  
114 when the SRP54 GTPase binds the hydrophobic signal peptide as it emerges from the exit  
115 channel of the 60S ribosomes as a ribosome nascent-chain complex [RNC; reviewed by (26-  
116 28)]. This causes the ribosomes to pause translation and permits the SRP-ribosome complex  
117 to associate with the SRP receptor (SR) on the ER that consists of the membrane associated  
118 SRP101 and the integral membrane protein SRP102 (SR $\alpha$  and SR $\beta$ , respectively, in  
119 metazoans). In yeast and metazoans, SRP14 and the Alu domain of the SRP RNA play an  
120 important role in this "pausing" by blocking the GTP-dependent elongation factor eEF2 from  
121 binding at the GTPase-associated center near the mRNA entry channel at the interface  
122 between the 40S and 60S ribosomes (37,39,40). The interactions with the ribosomes depend  
123 on the SRP proteins; human 7SL RNA does not bind the ribosomes by itself (41). The SRP-  
124 ribosome complex eventually associates with the Sec61 translocon on the ER membrane, the  
125 SRP dissociates from the ribosome and translation continues with the polypeptide inserted  
126 into the ER lumen or membrane. Ded1 could be intimately associated with this process.

127         We find that Ded1 is an SRP-associated factor. Ded1 is genetically linked to the SRP  
128 proteins, and it associates with SRP complexes in pull-down experiments and sucrose  
129 gradients. The purified recombinant SRP proteins physically interact with Ded1 *in vitro*.  
130 Moreover, fluorescence microscopy shows that Ded1 is associated with mRNAs at the ER  
131 membrane in the cell. RNA binding assays show that Ded1 has a high affinity for SCR1  
132 RNA. Finally, the ATPase activity of Ded1 is inhibited by SRP21, and it is inhibited much

133 more when SRP21 is associated with SCR1 than with other RNAs. We propose a model  
134 where Ded1 plays an important role in the SRP-dependent translation of proteins.

## 135 **RESULTS**

### 136 **Ded1 associated with SRP factors *in vivo***

137 We have been using a modified photoactivable-ribonucleoside-enhanced-crosslinking-and-  
138 immunoprecipitation (PAR-CLIP) technique to identify RNA substrates of Ded1 *in vivo*  
139 (24,25). This is an ongoing project, but in the process we recovered significant crosslinks to  
140 the noncoding RNA SCR1 that is part of the SRP involved in co-translational transport of  
141 polypeptides into the membrane and lumen of the ER (Figure 1). Although unanticipated, this  
142 result was consistent with our previous observations that Ded1 cosediments and associates  
143 with complexes containing SRP proteins on polysome sucrose gradients, as determined by  
144 pull-down experiments and mass spectroscopy analyses (13). These data show that Ded1 and  
145 SRP proteins SRP14, SRP21, SRP54 and SRP68 sediment at a position corresponding to  
146 ~26S (Table 1). Moreover, SRP14, SRP21, Sec65 and SRP68 are in stable complexes  
147 associated with Ded1 on the sucrose gradients that are pulled down with Ded1-specific IgG  
148 (Table 2). These results indicated that Ded1 might be associated with ribosomes translating  
149 mRNAs encoding ER proteins.

150 To elaborate on these observations, we did pull-down experiments of yeast extracts  
151 with IgG against Ded1 and then subjected the recovered material to Northern blot analysis  
152 with a <sup>32</sup>P-labeled DNA probe against SCR1. We used a probe against PGK1 mRNA as a  
153 positive control because it also was found to crosslink efficiently to Ded1, and a probe against  
154 RPL20B mRNA as a negative control as we obtained little crosslinking on this RNA, even  
155 though it is a highly expressed mRNA (42). However, the resulting signals were insufficiently  
156 sensitive. This was not unexpected as Ded1 interacts with a large number of mRNAs, and the  
157 RNAs of interest represented a small fraction of these total RNAs (14,43). Hence, we

158 performed RT-PCR on the samples using oligonucleotides specific for the three RNA. Both  
159 SCR1 and PGK1 RNAs were amplified much more in the fractions pulled down with Ded1-  
160 specific IgG than in the control fractions that were pulled down with pre-immune IgG (Figure  
161 2A). In contrast, RPL20B mRNA was weakly amplified in both cases. Hence, Ded1  
162 associated with SCR1 RNA *in vivo*.

163         It was possible that Ded1 interacted with the SCR1 RNA independently of the SRP  
164 proteins. To test this, we did Ded1-IgG pull-down experiments, SDS-PAGE separation and  
165 Western blot analyses of the recovered proteins. However, we were only able to obtain  
166 antibodies against Sec65 [generously provided by Martin R. Pool; (44)]. (We later made IgG  
167 against SRP21.) Hence, we cloned all the *SRP* genes with amino-terminal HA tags, and we  
168 did Ded1-IgG pull-downs with strains independently expressing each tagged protein (Figure  
169 2B). We recovered a significant amount of SRP14, SRP54, Sec65 and SRP101. Likewise, we  
170 digested the Ded1-IgG-bound complexes with RNase A prior to elution to determine if these  
171 complexes depended on SCR1 RNA; in all cases, the signals for the SRP proteins were  
172 reduced, but the signals were still more than for the pre-immune-IgG control (Figure 2B).  
173 Oddly, we detected little HA-tagged SRP21 even though it was prominent in our previous  
174 mass spectrometry analyses [Tables 1 and 2; (13)]. Moreover, we detected little HA-SRP21 in  
175 yeast extracts even though it is of similar size and has similar expression levels as SRP14  
176 (Figure 2B; Table 3). It was possible that the HA tag increased the proteolytic degradation of  
177 the protein during extraction or that the HA tag by itself was proteolytically removed. Thus,  
178 these results showed that Ded1 interacted with complexes containing the SRP proteins, and  
179 that these complexes were stabilized by SCR1 RNA (Figure 2B). Notably, the bound  
180 complexes also contained the SR receptor SRP101, which binds with SRP complexes  
181 associated with the ER during translation (26,35). We did not detect SRP102, but it contains



182 an integral membrane domain that could limit its recovery. Thus, Ded1 physically associated  
183 with the SRP complex *in vivo*.

#### 184 **Ded1 cosedimented with SRP factors**

185 In our previous work, we found that Ded1 migrated at a position corresponding to ~26S on  
186 sucrose gradients, but the Ded1-containing fractions were only partially resolved from the  
187 protein peak at the top of the gradient (13). Hence, we modified the previous sucrose gradient  
188 conditions to better resolve the different complexes. In both cases, we used 5 mM MgCl<sub>2</sub>  
189 because Ded1 was found to dissociate from higher molecular weight complexes at higher  
190 Mg<sup>2+</sup> concentrations and sediment within the protein peak at the very top of gradient. We did  
191 sucrose gradients of yeast strains independently expressing each HA-tagged SRP protein  
192 under identical conditions.

193 The polysome profile (Figure 3A) showed well resolved ribosome peaks that  
194 corresponded to the expected distribution of ribosomal RNAs (Figure 3B). Northern blot  
195 analyses with a SCR1-specific <sup>32</sup>P-labeled probe showed that the vast majority of the SCR1  
196 RNA migrated as a narrow peak centered at fraction 4 (arrow), but RNA was detected  
197 throughout the gradient (Figure 3C). Western blot analyses showed a very heterogeneous  
198 distribution of the proteins (Figure 3D). Ded1 and Sec65 were concentrated near the top of the  
199 gradients while the other SRP proteins were more widely distributed. SRP54 migrated as two  
200 bands that probably represented different modified forms of the protein. Oddly, we did not  
201 detect HA-tagged SRP21 even though it was prominent in our previous mass spectrometry  
202 analyses [Tables 1 & 2; (13)]; however, this result was consistent with the IgG pull-down  
203 experiments. Moreover, all of the detected proteins were found in fraction 4 that had the most  
204 SCR1 RNA.

205 It is known that constitutive over-expression of the SRP proteins can cause them to  
206 accumulate in the nucleus, which may affect their distribution on the sucrose gradients (45).

207 Consequently, we did sucrose gradients of the endogenously-expressed Sec65 and probed the  
208 membranes with Sec65-specific IgG; it showed a similar distribution as the HA-tagged  
209 protein, but it was present as a doublet (Figure 3E). Likewise, we made SRP21-specific IgG  
210 to detect endogenous SRP21 in the gradients (Figure 3F). The vast majority of the protein was  
211 stuck in the well of the gel or migrated only a short distance into the gel that indicated that  
212 SRP21 formed large, partially insoluble aggregates. We obtained similar results with  
213 recombinant SRP21 in the presence of RNA (see below section: **SRP21 did not block Ded1**  
214 **binding to SCR1**). Nevertheless, the majority of both Sec65 and SRP21 sedimented at the  
215 position corresponding to the bulk of the SCR1 RNA in the gradients.

216 The data were consistent with Ded1 interacting with the SRP complex. However, the  
217 vast majority of the material was not associated with translating ribosomes, although there  
218 was a smaller peak of Ded1 and most of the SRP proteins in fraction 12 that corresponded to  
219 the 80S complex (arrow). These results indicated either that most of Ded1 and the SRP  
220 complex were not actively involved in translation or that the complexes were not stably  
221 associated with the ribosomes under the conditions used. Thus, it was unclear as to the  
222 functional role of the Ded1-SRP interactions.

### 223 **Ded1 was genetically linked to SRP proteins**

224 We next tested to see if there was a genetic link between Ded1 and the SRP proteins as we  
225 previously demonstrated for the nuclear and cytoplasmic cap-associated proteins (13). We  
226 used the same cold-sensitive mutant F162C of Ded1 in the *ded1::HIS3* deletion strain and  
227 over-expressed the SRP proteins and SCR1 RNA from the pMW292 and pM299 plasmids  
228 (44,46). Liquid cultures were serially diluted and spotted on 5-FOA plates that were incubated  
229 at 18°C, 30°C and 36°C (Figure 4). The results showed a slight enhancement of growth at  
230 18°C that was consistent with a genetic interaction between Ded1 and the SRP complex, but  
231 the signal was too weak to demonstrate a clear link. The weak multicopy suppression was not

232 unexpected because Ded1 is implicated in the expression of multiple mRNAs that are not  
233 associated with SRP complexes (14,43); expression of these mRNAs would be insensitive to  
234 the over-expressed SRP factors. Thus, it was possible that the SRP complex would be more  
235 sensitive to the level of Ded1 expression than vice versa.

236 Previous work has shown that loss of any SRP component leads to a slow-growth  
237 phenotype (47-49), although yeast cells are eventually able to adapt to this loss (50,51). Thus,  
238 we obtained yeast strains with the *DED1*, *SRP14*, *SRP21*, *SEC65*, *SRP68*, *SRP72* and *SRP101*  
239 genes under the control of a tetracycline-regulated promoter that could be suppressed with  
240 doxycycline (52). Unfortunately, *SRP54* under the tetracycline promoter was not available.  
241 Cultures of the different strains were grown in liquid culture, serially diluted and spotted on  
242 agar plates in the presence or absence of 10 µg/ml of doxycycline. All the strains except  
243 *SRP101* showed reduced growth with the constitutive expression of the proteins, which was  
244 most apparent at 18°C (Figure 5). In the presence of doxycycline, all the strains show strongly  
245 reduced growth except *SRP21*, *Sec65* and *SRP101*, which showed a slight reduction. Western  
246 blot analysis of liquid cultures of *TET-SRP21* and *TET-SEC65* grown for up to 24 h in the  
247 presence of 10 µg/ml of doxycycline showed no diminution in protein level when probed with  
248 *SRP21*-IgG or *Sec65*-IgG, respectively (data not shown). This indicated that either the *TET*  
249 promoter was not completely shut down with doxycycline in these strains or that the proteins  
250 were particularly stable. Interestingly, *TET-SRP21* actually grew slightly better in the  
251 presence of doxycycline, which further indicated that constitutive expression of the proteins  
252 was detrimental (Figure 5). Constitutive and overexpression of Ded1 was previously shown to  
253 inhibit cell growth (53,54).

254 We transformed the different *TET* strains with a plasmid containing *DED1* under  
255 control of the very strong *GPD* promoter and compared it with cells transformed with the  
256 empty plasmid and with wildtype yeast cells (55). We likewise transformed the cells with a

257 plasmid expressing the mutant Ded1-F162C protein that had reduced ATP binding and  
258 enzymatic activity (46). As expected, the yeast stains *TET-SRP21* and *TET-SEC65*, which  
259 continued to express the SRP proteins, showed reduced growth on the plates due to the  
260 inhibitory effects of the overexpressed Ded1 (Figure 6). In contrast, SRP14, SRP68 and  
261 SRP72 showed enhanced growth despite the inhibitory effects of Ded1 (Figure 6). The Ded1-  
262 F162C mutant showed little or no stimulatory effect, which indicated that the enzymatic  
263 function of Ded1 was important for the enhanced growth. Thus, high expression of Ded1  
264 partially suppressed the slow-growth phenotype of strains depleted for SRP proteins, and this  
265 result established a genetic link between Ded1 and the SRP complex.

#### 266 **Ded1 was in cellular foci associated with the endoplasmic reticulum**

267 The next question we asked was whether Ded1 co-localized with the ER as would be  
268 expected if it was associated with SRP-ribosome complexes that were translating mRNAs  
269 encoding polypeptides translocated into the ER. However, we and others have shown that  
270 Ded1 has a diffuse location within the cytoplasm under normal growth conditions (13,53,56).  
271 Nevertheless, some of the Ded1 protein is sequestered with translation-inactive mRNAs in  
272 cellular foci when the translation conditions are altered (53,57,58). We reasoned that if  
273 polypeptide import into the ER was transiently blocked then Ded1 would form foci associated  
274 with the ER. We used temperature-sensitive (ts) mutants of the Sec61 and Sec62 proteins that  
275 form the translocon pore in the ER for the import of SRP-dependent polypeptides during  
276 translation (59,60). At the non-permissive temperature, these mutants block or disrupt the  
277 Sec61 channel and ER-associated translation is terminated. As a marker, we used the  
278 integrated red-fluorescent-tagged amino-terminal domain of Kar2 fused to the HDEL ER  
279 retention signal (YIPlac204TKC-DsRed-Express2-HDEL; Addgene, Watertown, MA) in the  
280 two *sec* strains; Kar2 is an ATPase that functions as a protein chaperone for refolding proteins  
281 within the lumen of the ER [(61) and reference therein], and consequently the Kar2 chimera

282 serves as a marker of the ER lumen. We also used an ATPase-inactive Ded1-E307Q mutant  
283 (Ded1-DQAD) that has a high propensity to form cellular foci with sequestered mRNAs that  
284 are no longer undergoing translation.

285 We first looked at the distribution of proteins under permissive conditions (Figure  
286 7A). The distribution of Kar2-RFP around the nuclear envelope (central cisternal ER), as  
287 interconnected tubules (tubular ER) and as a cortical halo inside the plasma membrane of the  
288 cell wall (PM-associated ER) was consistent with the locations of the ER in yeast; actively  
289 translating ribosomes are associated with all these ERs (62). Ded1-DQAD-GFP was  
290 uniformly distributed in the cytoplasm, largely excluded from the nucleus, and it formed  
291 occasional foci that were distributed at various positions in the cytoplasm (Figure 7A). Both  
292 the *sec61-ts* and *sec62-ts* strains showed equivalent phenotypes. The intensity of the  
293 fluorescence signals of both Kar2-RFP and Ded1-DQAD-GFP was highly variable between  
294 cells, which probably reflected different levels of protein expression between cells.

295 At 37°C, Kar2-RFP showed a similar cellular distribution as at 24°C for both *sec61-ts*  
296 and *sec62-ts* mutants, although it showed an increased frequency of aggregates with the ER  
297 (Figure 7B). In contrast, Ded1-DQAD-GFP showed a pronounced increase in the number of  
298 foci that were highly variable in size (Figure 7B). Many of these foci were closely associated  
299 with Kar2-RFP, particularly as a chain of foci on the cytoplasmic side of the ER around the  
300 plasma membrane, where the PM-associated ER was expected to be located, and as a chain of  
301 foci corresponding to tubular ER (arrowheads, Figure 7B). Both the *sec62-ts* and *sec61-ts*  
302 strains showed similar phenotypes. In some cases, the Kar2-RFP aggregates and Ded1-  
303 DQAD-GFP foci were near each other. Thus, Ded1 was associated with mRNAs that were no  
304 longer undergoing translation in close proximity to the ER at the non-permissive temperature.  
305 This result was consistent with previous work that showed that Ded1 is recovered with  
306 membrane-associated ribosomal-protein complexes (63).

307 We next asked if the SRP proteins showed similar properties. We used GFP-tagged  
308 SRP14 and SRP21 proteins that were expressed off the chromosome (GFP bank, Thermo  
309 Fisher Scientific, Waltham, MA) and the plasmid-encoded Ded1-DQAD-mCh mutant. The  
310 SRP14-GFP showed a weak but uniform signal in all the cells, where the protein was  
311 concentrated on the ER (Figure 7C). SRP21-GFP showed a similar profile (data not shown).  
312 In contrast, the plasmid-expressed Ded1-DQAD-mCh showed highly variable expression. We  
313 used cells grown under wildtype conditions or depleted for glucose, which promoted the  
314 formation of cellular foci. However, depending on the cellular growth we obtained a  
315 significant number of foci associated with the ER even under wildtype growth (arrowheads,  
316 Figure 7C). Thus, Ded1 was in close proximity to both the ER and the SRP proteins in the  
317 cell.

### 318 **Overexpressed SRP proteins accumulated in the nucleus and nucleolus**

319 The biogenesis and metabolic pathway of the SRP RNP is complex, and it involves a large  
320 number of different steps [reviewed by (32,64,65)]. In yeast, the SRP proteins SRP14, SRP21,  
321 SRP68 and SRP72 are assembled on the SCR1 RNA probably in the nucleolus. Sec65 is in  
322 the nucleus, but there is some ambiguity about whether it accumulates in the nucleolus as  
323 well, although the equivalent mammalian SRP19 protein is found there (32,45,66). The  
324 partially assembled SRP complex is then exported to the cytoplasm through the XpoI/CrmI  
325 nuclear pore complex whereupon it binds with SRP54, which subsequently associates with  
326 the signal sequence of the partially translated polypeptide and causes the SRP to assemble on  
327 the 80S ribosomes. We previously showed that Ded1 actively shuttles between the nucleus  
328 and cytoplasm using the XpoI and Mex67 nuclear pores (13). Thus, it was possible that Ded1  
329 associated very early with the SRP complex within the nucleus, and that it was important for  
330 the biogenesis or export of the complex.

331 The XpoI nuclear pore is known to export multiple cargoes, including ribosomal  
332 subunits, certain small nuclear RNAs, some viral RNAs and the assembled SRP complex  
333 (45,66-68). We used a yeast strain with a mutant *xpoI* allele that is sensitive to the bacterial  
334 toxin leptomycin b from *Streptomyces* to test whether Ded1 was involved in the XpoI-  
335 dependent export of the SRP (69); this strain contains a single mutation (XpoI-T539C) that  
336 makes the yeast protein sensitive to the drug (70). We previously showed that both the Mex67  
337 and XpoI nuclear pore complexes must be disrupted to see a significant accumulation of Ded1  
338 in the nucleus (13). We transformed this strain with plasmids expressing Ded1-mCh and with  
339 plasmids expressing either SRP14-GFP or SRP21-GFP, and we determined the locations of  
340 the tagged proteins.

341 The plasmid-encoded SRP14-GFP had highly variable expression between cells, but it  
342 showed a strong nuclear location that was often concentrated in crescent-shaped regions even  
343 in the absence of leptomycin b (Figure 7D, Figure 8A & 8B). In contrast, SRP21-GFP  
344 showed a diffuse location throughout the nucleus, which indicated that the overexpressed  
345 protein was not able to assemble or accumulate in the nucleolus (Figure 8C & 8D). However,  
346 it occasionally formed nuclear foci (arrowheads, insert Figure 8C). The expression of the  
347 plasmid-encoded Ded1-DQAD-mCh was likewise highly variable, and it was largely  
348 excluded from the nucleus even in the presence of leptomycin b (Figure 7D, Figure 8).  
349 However, in some instances with leptomycin b, where Ded1-DQAD-mCh was lightly  
350 expressed, we found that the protein accumulated in crescent-shaped regions with SRP14-  
351 GFP (arrowheads, insert Figure 7D). The Ded1-DQAD mutant binds RNA with a high  
352 affinity in the presence of ATP but it can not hydrolyze the ATP to recycle the complex.  
353 Thus, Ded1 could co-localize with the SRP complex in the nucleolus but only under  
354 conditions where Ded1 export was blocked. The absence of Ded1-DQAD in the nucleus and

355 crescents in the absence of leptomycin argued that Ded1 was not needed for SRP assembly  
356 and export, but the data could not rule out this possibility.

### 357 **Ded1 physically interacted with SRP factors**

358 Our data indicated that Ded1 could bind SCR1, associate with the SRP complex and co-  
359 localize with the ER. Moreover, we obtained a genetic link between Ded1 and SRP proteins.  
360 However, it was unclear whether Ded1 physically interacted with the SRP proteins or  
361 indirectly through the SCR1 RNA (Figure 1). The metazoan SRP14 and SRP9 are known to  
362 bind 7SL in the Alu domain, SRP54 and SRP19 bind helices 6 and 8, and SRP68 and SRP72  
363 bind around the junction between helices 5e, 5f, 6, 7 and 8 (27,35). However, yeast SRP14 is  
364 thought to bind the Alu domain as a homodimer and the role of SRP21 to date is largely  
365 speculative, although it is considered a structural homolog of SRP9 (36,38). Yeast Sec65  
366 serves a similar role as SRP19, but it is considerably larger (47,49,71). The SRP bound on the  
367 80S ribosomes shows an extended structure where the S-domain interacts with the exit  
368 channel containing the signal peptide and the Alu domain interacts with the entry region of  
369 the mRNA (37,39,40). However, SCR1 contains two hinge regions (Figure 1); it was possible  
370 that the SCR1 RNA was folded upon itself in its free form and that this brought the different  
371 regions of the SRP in close proximity. Thus Ded1 might interact with multiple different SRP  
372 proteins.

373 To test this, we subcloned the genes encoding the different proteins into pET22 and  
374 pET19 plasmids and then purified the recombinant proteins expressed in *Escherichia coli* on  
375 nickel-agarose columns. We then incubated the purified individual proteins or combination  
376 therein with purified Ded1, recovered the complexes with Ded1-IgG-Protein-A-Sepharose  
377 beads and separated the recovered proteins by SDS-PAGE (Figure 9).

378 The results showed that Ded1 formed stable interactions with SRP14 and Sec65.  
379 Unfortunately, SRP68, SRP72 and SRP101 migrated at positions on the SDS-PAGE that



380 overlapped with Ded1; hence we were not able to obtain unambiguous results, but they  
381 appeared to have little or no affinity for Ded1. SRP54 did not stably associate with Ded1 by  
382 itself. In contrast, SRP21 was not consistently recovered with Ded1, which indicated that it  
383 formed weak interactions with the protein (Figure 9). However, SRP21 was consistently  
384 recovered with Ded1 in the presence of SRP14, which was consistent with SRP14 and SRP21  
385 forming a stable heterocomplex as previously proposed (38). Likewise, SRP54 was recovered  
386 with Ded1 in the presence of Sec65; this was consistent with the two proteins being in close  
387 proximity on the S domain of SCR1 (47,49,71). Moreover, all four SRP proteins were  
388 recovered with Ded1 when incubated together.

389         The weak interactions between SRP21 and Ded1 were primarily through the amino-  
390 terminal domain because deleting the 73 carboxyl-terminal amino acids (SRP21 $\Delta$ 73) did not  
391 eliminate this affinity (Figure 9B). Finally, we recovered Ded1 in pull-down experiments with  
392 SRP21-specific IgG (Figure 9B). Thus, Ded1 was capable of forming protein-protein  
393 interactions with the SRP proteins in the absence of SCR1 RNA. Nevertheless, the presence  
394 of SCR1 RNA enhanced the recovery of all the proteins (see section: **Ded1 associated with**  
395 **SRP factors *in vivo***).

### 396 **SRP21 inhibited the SCR1-dependent ATPase activity of Ded1**

397 Ded1 is an RNA-dependent ATPase. We previously showed that the nuclear and cytoplasmic  
398 cap-associated factors would stimulate the ATPase activity of Ded1 in the presence of RNA  
399 (13). We wondered whether the SRP proteins would alter the enzymatic activity of Ded1 as  
400 well and whether it would be preferential for the SCR1 RNA, which would be the authentic  
401 substrate for the assembly of the SRP proteins. We tested this with an *in vitro*, T7-  
402 polymerase-transcribed SCR1 RNA that was equivalent to the endogenous SCR1 except that  
403 the 5' terminal nucleotide was replaced with a guanosine to facilitate transcription. As a  
404 control we used a fragment of the actin pre-mRNA precursor containing short exon sequences

405 and the entire intron. In addition, the actin transcript was of similar size to SCR1 (605 nts and  
406 552 nts, respectively).

407 Many of the SRP proteins at nearly a 30-fold excess over Ded1 inhibited the RNA-  
408 dependent ATPase activity of Ded1 somewhat for both actin and SCR1, although SRP54  
409 seemed to enhance the activity slightly, especially with actin (Figure 10A). This was not  
410 unexpected because the SRP proteins were largely basic and positively charged under the  
411 reaction conditions (pH 7.5; Table 3); the proteins would be expected to nonspecifically  
412 associate with the RNAs and thereby reduce the effective concentration of the RNAs  
413 accessible to Ded1. SRP21 showed a much stronger inhibition, especially with SCR1, but it  
414 was the most basic ( $pK_i = 11.14$ ) of the SRP proteins. To further elucidate the nature of the  
415 inhibition, we compared the ATPase activity of Ded1 with SCR1 and actin RNAs with  
416 SRP21. SRP21 is considered the structural homolog of SRP9, and in yeast it probably forms a  
417 complex with a homodimer of SRP14 that binds the Alu domain of SCR1 (36,38). Thus we  
418 tested to see if SRP14 would enhance the inhibitory effects of SRP21.

419 Equimolar concentrations of both the actin precursor and SCR1 stimulated the ATPase  
420 activity of Ded1, but the stimulation was not equivalent. Moreover, there was variability in  
421 the stimulatory effects with different RNA preparations, which probably reflected variability  
422 in the folding of the RNAs during preparation. Indeed, others have shown that the smaller  
423 human 7SL RNA is difficult to recover as a homogeneous structure *in vitro* (41). Thus, to  
424 facilitate comparisons we normalized the activity relative to that of Ded1 with the RNA alone  
425 and used the same RNA preparations for comparisons. In addition, we used 8.5-fold less of  
426 the SRP proteins to emphasize the differences.

427 SRP14 may have slightly inhibited Ded1 with SCR1 but it had little affect with actin  
428 (Figure 10B). In contrast, SRP21 inhibited the ATPase activity of Ded1 with SCR1 by about  
429 75% but only by 25% with actin. This indicated that there was some nonspecific inhibition,

430 but that the strongest inhibition was obtained with the authentic substrate of SRP21. Addition  
431 of SRP14 reduced the activity of Ded1 in the presence of SRP21 by an additional 8% for  
432 SCR1 but showed no additional reduction with actin. Thus, SRP14 enhanced the SRP21-  
433 dependent inhibition of Ded1 with SCR1 RNA. Addition of the other SRP proteins to SCR1  
434 further reduced the activity by about 4%. None of the purified SRP proteins showed any  
435 intrinsic ATPase activity in the absence of Ded1, and none of the SRP proteins affected the  
436 ATPase activity of Ded1 in the absence of RNA (Figure 10B and data not shown).

437 The data indicated that SRP21 in the presence of its authentic substrate was the most  
438 effective at inhibiting Ded1. Thus, it was likely that SRP21 bound to the Alu domain of SCR1  
439 formed the most effective inhibitory structure. We tested this with deletions of the S domain  
440 (SCR1 $\Delta$ S1) and Alu domain (SCR1 $\Delta$ Alu). Previous work has shown that the folding of  
441 mammalian 7SL RNA is difficult, and it needs a temperature step for refolding involving  
442 slow cooling in the presence of monovalent cations; moreover, the assembly of the SRP  
443 proteins is complicated (41). The yeast SCR1 RNA is about two-fold larger with a number of  
444 additional hairpins, so we anticipated difficulties in obtaining a functional homogenous  
445 structure (Figure 1). Thus, we assayed various permutations of pre-incubating the RNA with  
446 the various proteins prior to adding the ATP, but they all yielded similar results. Ded1 was  
447 significantly less active with both SCR1 $\Delta$ S1 and SCR1 $\Delta$ Alu than full-length SCR1 at  
448 equimolar concentrations of RNA, but the RNAs were 77% and 58%, respectively, of the size  
449 of SCR1 (Figure 11A). This may account for the reduced ATPase activity, but it was possible  
450 that Ded1 was activated by specific structures within the SCR1 RNA that were absent or  
451 misfolded in the deletions. SRP21 inhibited the ATPase activity for SCR1 and to a lesser  
452 extent actin, but it had little inhibitory effect on the SCR1 deletions, which was consistent  
453 with a structure-dependent inhibition. We also tested a carboxyl-terminal deletion of SRP21  
454 (SRP21 $\Delta$ 73) that lacked the amino acids that did not correspond to those of mammalian SRP9

455 (38); it showed significantly less inhibition, which was consistent with it playing a role in the  
456 SRP21 interactions with SCR1 and Ded1 (Figure 11A).

457         The ATPase activity of Ded1 is stimulated by various RNAs containing single-  
458 stranded regions, but it is most activated by poly(A)-containing RNAs (72). We repeated the  
459 ATPase assays with purified yeast RNA. We needed to use 0.12–0.14  $\mu\text{g}/\mu\text{l}$  of yeast RNA to  
460 obtain similar levels of activation of Ded1 as 23 nM of SCR1 (0.0039  $\mu\text{g}/\mu\text{l}$ ) or actin (0.0044  
461  $\mu\text{g}/\mu\text{l}$ ; Figure 11B). Thus, yeast RNA was ~30-fold less effective at stimulating the activity.  
462 SRP21 and SRP14 showed no inhibitory effects, and they may have actually stimulated the  
463 ATPase activity of Ded1 somewhat, perhaps by acting as RNA chaperones to increase the  
464 accessibility of the RNA to Ded1. However, the yeast RNA was a heterogenous mix that may  
465 have had both activating and inhibitory RNAs. Thus, we repeated these experiments with  
466 yeast tRNAs and poly(A) RNA at 0.12  $\mu\text{g}/\mu\text{l}$  (Figure 11C). Both RNAs needed ~30-fold  
467 higher concentration than for SCR1 to stimulate the ATPase activity of Ded1 to similar levels,  
468 but SRP21 had little affect on the activities. Thus, Ded1 and SRP21 preferentially bind RNAs  
469 with certain sequences or structural features.

#### 470 **SRP21 did not block Ded1 binding to SCR1**

471 The previous results indicated that Ded1 was either blocked from binding the SCR1 RNA or  
472 that its ATPase activity was inhibited by protein-protein contacts with SRP21 bound on the  
473 RNA. To test this, we did electrophoretic mobility shift assays (EMSA) with the different  
474 proteins and RNAs. Our previous work showed strong, concentration-dependent binding of  
475 Ded1 to short oligonucleotides in the presence of AMP-PNP with a  $K_{1/2}$  of ~40 nM and weak  
476 binding in the presence of ADP or in the absence of a nucleotide (73). We repeated these  
477 experiments with the longer RNAs, but we separated the products on agarose gels containing  
478 ethidium bromide. Similar results were obtained when the gels were run in the absence of  
479 ethidium bromide, which was then soaked into the gels after electrophoresis (data not shown).

480           A 5- to 10-fold excess of Ded1 was able to displace the majority of both SCR1 and  
481 actin (Figure 12A). SCR1 typically migrated as a distinct band but actin often showed more  
482 heterogeneity, which probably reflected more profound conformational heterogeneity. This  
483 varied somewhat between RNA preparations. In contrast, SRP21 preferentially bound SCR1  
484 RNA over actin (Figure 12B). Moreover, it seemed to form large molecular-weight  
485 aggregates that only partially migrated into the gels. Deleting the carboxyl-terminal sequences  
486 of SRP21 (SRP21 $\Delta$ 73) largely eliminated the binding affinity, indicating that these sequences  
487 were either important for binding or for maintaining the correct conformation of the protein  
488 (Figure 12C).

489           We next asked what affect SRP21 would have on Ded1 binding. The results showed  
490 that SRP21 had little affect on Ded1 binding, but the retarded bands tended to migrate as  
491 higher molecular-weight complexes in the presence of SRP21 for SCR1 (Figure 13A). We  
492 previously showed that the carboxyl-terminal domains of DEAD-box proteins, including  
493 Ded1, are important for high affinity binding to RNAs (54). Consistent with this, deleting 78  
494 amino acids from the carboxyl terminus of Ded1 largely eliminated RNA binding (Figure  
495 13B). However, addition of SRP21 had little affect on Ded1 binding even though a small  
496 amount of material was sequestered near the origin of the gel (Figure 13C). Instead, Ded1  
497 seemed to actually reduce the binding affinity of SRP21 for the RNA, and this was true for  
498 the carboxyl-terminal deletion of Ded1 as well (Figure 13C). Thus, although SRP21  
499 modulated the ATPase activity of Ded1, Ded1 seemed to modulate SRP21 binding, perhaps  
500 through interactions with the amino-terminal domain of Ded1 or the RecA-like core.

501           Finally, we asked what structural features of SCR1 were recognized by the proteins.  
502 These experiments were more ambiguous because the binding site of SRP21 is largely  
503 unknown and because there was no guarantee that the RNAs deletions would fold into the  
504 anticipated conformations. The results showed that both Ded1 and SRP21 were able to bind

505 the SCR1 RNAs deleted for the Alu and S domains (Figure 14). Thus, SRP21 probably  
506 recognized multiple features of the SCR1 RNA. Moreover, the strong binding of Ded1 to the  
507 deleted SCR1 RNAs did not correlate with the reduced ATPase activities of Ded1 with these  
508 RNAs (Figure 11A). Therefore, either Ded1 could bind the RNAs in a nonproductive form or  
509 the ATPase activity of Ded1 was modulated by the different structures.

## 510 **DISCUSSION**

511 Our experiments show that Ded1 is an SRP-associated factor. It physically interacts with the  
512 SCR1 RNA and many of the SRP proteins both *in vitro* and *in vivo*. It is genetically linked to  
513 these proteins, and it co-sediments with the SRP factors in sucrose gradients. The RNA-  
514 dependent ATPase activity of Ded1 is inhibited by SRP21 and this inhibition is much more  
515 pronounced in the presence of SCR1 RNA, the authentic substrate of SRP21. Although there  
516 is probably conformational heterogeneity of the RNAs, SRP21 preferentially binds SCR1  
517 RNA over actin RNA, which indicates that it contains or forms the necessary elements for  
518 high-affinity SRP21 binding. Likewise, the ATPase activity of Ded1 is preferentially  
519 activated by SCR1 and actin RNAs over an equivalent concentration whole yeast RNA, tRNA  
520 or poly(A) RNA, which indicates that it is recognizing specific features or structures of these  
521 RNAs. The nature of these features or structures is unclear. Finally, Ded1 co-localizes in  
522 cellular foci with the ER-associated mRNAs, and it occasionally co-localizes with SRP  
523 proteins in the nucleolus.

524 The role of SRP21 to date is largely unclear. It is considered as the structural homolog  
525 of metazoan SRP9, which forms a heterodimer with SRP14 on the Alu domains of 7SL RNA,  
526 even though there is little or no sequence homology (38). The amino-terminal residues of  
527 SRP21 are capable of forming similar structural features as SRP9, but it is over 80% bigger;  
528 the carboxyl-terminal sequences are thought to compensate for the abbreviated Alu domain of  
529 yeast SCR1, which lacks the characteristic hairpins H3 and H4 (38). Moreover, yeast SCR1 is

530 about 75% bigger than metazoan 7SL, and it contains additional structures between the Alu  
531 and S domains (33,34). SRP21 may be needed to stabilize or form the correct conformation of  
532 the SCR1 RNA, and thus it may need to recognize multiple structures or features of the RNA.  
533 Consistent with this, SRP21 binds full-length SCR1 RNA and the deletions *in vitro* with  
534 similar affinity. In contrast, it has weak affinity for the actin RNA. The carboxyl-terminal  
535 sequences of SRP21 are important for this affinity. This is consistent with SRP21 forming a  
536 complex with the SRP14 homodimer as previously proposed (38).

537 SRP21 inhibits the RNA-dependent ATPase activity of Ded1, but it is much more  
538 effective in the presence of SCR1 RNA than actin RNA. In contrast, Ded1 binds SCR1 and  
539 actin RNAs with similar affinities and it is activated to similar extents. Under these  
540 circumstances, one would expect SRP21 to reduce Ded1 binding to SCR1 but not to actin  
541 because SRP21 would reduce the number of potential binding sites for Ded1 on SCR1. But  
542 this is not the case, and if anything SRP21 seems to enhance Ded1 binding to SCR1 slightly.  
543 The inhibition is due to protein-protein contacts, but SRP21 is less stably associated with  
544 Ded1 in the absence of SRP14 or SCR1 RNA. Thus, SRP21 probably forms a specific  
545 inhibitory structure with Ded1 in the presence of SCR1 RNA. This is consistent with a  
546 functional regulation of the ATPase activity of Ded1 in the context of the SRP complex.

547 Ded1 is an ATP-dependent RNA binding protein, and it is capable of forming long-  
548 lived complexes with RNA in the presence of a nonhydrolyzable analog of ATP *in vitro* (8).  
549 Ded1 is considered a translation-initiation factor [(14,15) and references therein], but  
550 crosslinking studies on DDX3 show most of the interactions on the open reading frames of a  
551 subset of the mRNAs (74). We obtained similar results with Ded1 (data not shown). Thus,  
552 Ded1 remains associated with the ribosomes during translation elongation, which can be seen  
553 in polysome profiles as well [this work and (13)]. Ded1 likewise is found with membrane-

554 associated ribosomes (63). Thus, Ded1 may play important roles in translation elongation as  
555 well as in initiation—including membrane-associated translation.

556 Ded1 is associated with 90S ribosomal precursors, which may indicate a role of Ded1  
557 in SRP assembly in the nucleolus (75). We do see occasional co-localization of the Ded1-  
558 DQAD mutant with overexpressed SRP14 in crescent-shaped structures in the nucleus that  
559 are consistent with this possibility, but SRP21 has a diffuse location within the nucleus, and it  
560 is never seen concentrated in the crescent-shaped structures. Thus, it may associate with the  
561 SRP complex outside the nucleolus or it may be transiently located within the nucleolus, as  
562 has been proposed for Sec65 (45). Thus, we can not rule out a role for Ded1 in the biogenesis  
563 of the SRP complex in the nucleus that is regulated by SRP21. Under these circumstances,  
564 Ded1 may associate early with the SRP complex and remain attached even when the complex  
565 binds the 80S ribosomes. This would provide a possible mechanism by which ER-specific  
566 mRNAs are selected for translocation on the ER. Interestingly, DDX3 crosslinks to 7SL RNA  
567 as well (74). Thus, although metazoans lack a clear equivalent to SRP21, DDX3 may also be  
568 intimately connected to SRP-dependent translation.

569 On the basis of these observations, we propose the following model for the role of  
570 Ded1 (and DDX3-like proteins) in membrane-associated translation. Ded1 interacts with cap-  
571 associated factors and with Pab2 bound on the 3' poly(A) tail of the mRNA (not shown). The  
572 3' UTR is considered important for SRP-dependent targeting of mRNAs [reviewed by (76)];  
573 but the SRP is not known to directly interact with the mRNA, and it may interact through  
574 another RNA binding protein (77). Ded1 (and DDX3) could serve this role as it interacts with  
575 both 5' and 3' components of the mRNA [(13,16) and references therein]. Ded1 remains  
576 attached to the mRNA during scanning by the 43S ribosomes, assembly of the 48S ribosomes  
577 and eventual formation of the 80S ribosomes at the AUG start codon (Figure 15A). This is  
578 consistent with crosslinking experiments of ribosomal RNA that show Ded1 near the mRNA



579 entry channel (43). The RNA-dependent ATPase activity of Ded1 is uninhibited, and it is able  
580 to translocate on the mRNA with the ribosomes through rapid cycling between the "open" and  
581 "closed" conformations, and it may further stabilize the ribosome-mRNA complex during  
582 scanning, assembly and translation (14). During this time, an inactive form of the SRP may  
583 associate with the mRNA-ribosome-Ded1 complex through postulated 3' UTR factors that are  
584 specific for SRP-dependent translation while the ribosomes are still part of the soluble  
585 fraction during a pioneering round of translation as previously proposed (77). The Alu  
586 domain of the SRP would be easily displaced from the ribosomes by elongation factors (78).  
587 Ded1 may play an important role in the assembly and stabilization of this complex because it  
588 can interact with all the relevant factors. Alternatively, Ded1 may help associate the SRP on  
589 the ribosomes once the signal peptide is sufficiently long according to the classical model  
590 (79).

591         In the next step, the signal peptide binds in the hydrophobic groove of the GTPase  
592 SRP54 that subsequently causes conformational changes of the SRP and its interactions with  
593 the ribosome [(40,78,80) and references therein]. SRP14 bound on the Alu domain of SCR1  
594 binds at the GTPase center located at the 40S-60S interface and thereby transiently blocks the  
595 GTPase elongation factor eEF2 from binding (37,39,40). At the same time, SRP21 binds to  
596 Ded1 and inactivates its ATPase activity. This results in Ded1 maintaining a closed  
597 conformation that has high affinity for the RNA but that also crimps the RNA bound on RecA  
598 domain 1; this prevents both Ded1 and the ribosomes from sliding on the mRNA by  
599 effectively clamping the mRNA (Figure 15B). Another factor than SRP9 may play this role in  
600 metazoans. The SRP complex undergoes conformational changes during this time, and Ded1  
601 may also bind the SCR1 RNA through its carboxyl terminus to facilitate the subsequent  
602 interactions of SRP14 with the ribosomes.

603           The absence of DDX3-like RNA helicases in *in vitro* reconstituted systems might  
604 explain why this pausing is often short or absent (81). Ded1 may also stabilize the paused  
605 ribosomes to prevent premature termination or frameshifting. The paused ribosomes then  
606 associate with the peripheral-membrane GTPase SRP101 and the integral-membrane protein  
607 SRP102 that form the SRP receptor (SR) complex (Figure 15C). Once associated with the  
608 Sec61 translocon, the SRP complex undergoes further conformational changes and is either  
609 released from the ribosome or assumes an inactivated form on the ribosomes. The ATPase  
610 activity of Ded1 is restored and translation can resume (Figure 15D).

611           Ribosome pausing events are important for other translational events in addition to  
612 SRP-dependent protein translocation. For example, pausing is associated with co-translational  
613 protein folding, protein targeting, mRNA and protein quality control, and with co-  
614 translational mRNA decay [reviewed by (82)]. Ded1 (and DDX3) may be intimately  
615 associated with these events by a similar mechanism but with other associated factors besides  
616 the SRP proteins. Likewise, ribosome pausing is associated with frameshifting events  
617 [reviewed by (83,84)]. Ded1 is important for L-A RNA virus replication (85), and it  
618 undergoes a -1 frameshifting event during translation of the gag-pol gene [reviewed by (86)].  
619 Similarly, retroviruses, such as HIV-1, undergo a -1 frameshifting event during translation  
620 [reviewed by (87)]. DDX3 is important for HIV-I replication, and the virions of retroviruses  
621 in general are enriched in 7SL RNA (23,88). Thus, the Ded1/DDX3 subfamily of proteins  
622 may play central roles in gene expression by regulating not only translation initiation but  
623 translation elongation as well.

624           Finally, we note that the bacterial polypeptide-translocase SecA is a superfamily 2  
625 "RNA helicase" that has a RecA-like core structure that is very similar to the DEAD-box  
626 proteins (89). It is intimately associated with the SecYEG translocon, and it uses ATP to drive  
627 post-translational polypeptides through the pore into the periplasm [reviewed by (26)]. Recent

628 work has shown that SecA mimics the properties of the SRP (90,91). Thus, the use of  
629 superfamily 2 proteins for polypeptide translocation across membranes may be conserved  
630 throughout evolution. The biological roles and substrates of these proteins may not be limited  
631 to nucleic acids.

## 632 **MATERIAL AND METHODS**

### 633 **Constructs**

634 The pMW295 and pMW299 plasmids encoding the SRP proteins and SCR1 were a kind gift  
635 from Martin R. Pool (44). They were used as templates to PCR-amplify the individual genes  
636 and SCR1 RNA. Other constructs are as described below. The oligonucleotides used and  
637 cloning strategies are shown in more detail in Supplementary Table 1. The SRP proteins were  
638 PCR amplified with the corresponding SRP \_up and \_low oligonucleotides off the pMW295  
639 and pMW299 plasmids (44). The PCR products were digested with SpeI and XhoI, gel  
640 purified, and cloned into the equivalent sites of the yeast plasmids 2HA-p415 and 2HA-p424  
641 with *ADH* promoters and *LEU2* and *TRP1* markers, respectively (92). Except for SRP68 and  
642 Sec65, all constructs were subcloned into the NdeI and XhoI sites of pET22b.

643 Because of internal NdeI sites, the pET19b versions of SRP68 and Sec65 were  
644 amplified with additional oligonucleotides. SRP68 was PCR amplified with SRP68\_up2 and  
645 SRP68\_low2. Sec65 was PCR amplified with Sec65-pET\_up and Sec65-pET\_low. The PCR  
646 products were digested with XhoI and BamHI, gel purified and cloned into the equivalent  
647 sites of pET19b.

648 SRP101 and SRP102 were amplified off purified chromosomal DNA using  
649 oligonucleotides with BamHI and XhoI sites because of an internal SpeI site in SRP101.  
650 SRP101 was PCR amplified with SRP101\_up and SRP101\_low. SRP102 was PCR amplified  
651 with SRP102\_up and SRP102\_low. The PCR products were digested with BamHI and XhoI,

652 gel purified and cloned into the equivalent sites of 2HA-p424. The constructs were subcloned  
653 into the NdeI and XhoI sites of pET22b.

654 The SRP14 and SRP21 wildtype and carboxyl-terminal deletions were cloned into the  
655 p413 plasmid containing a *HIS3* marker and *ADH* promoter by using an oligonucleotide  
656 complementary to the amino-terminal HA tag of the previous p415-PL-HA constructs and  
657 containing XbaI and XhoI sites (55). SRP14 was PCR amplified with p415HA\_up and  
658 SRP14\_low. SRP14 $\Delta$ 29 was PCR amplified with p415HA\_up and SRP14d29\_low. SRP21  
659 was PCR amplified with p415HA\_up and SRP21\_low. SRP21 $\Delta$ 73 was PCR amplified with  
660 p415HA\_up and SRP21d73\_low. The PCR products were digested with XbaI and XhoI, gel  
661 purified and cloned into the equivalent sites of p413. SRP14 $\Delta$ 29 and SRP21 $\Delta$ 73 were  
662 subcloned into the NdeI and XhoI sites of pET22b. Final constructs were all verified by  
663 sequencing and are shown in Supplementary Table 2.

664 The sequence encoding the SCR1 RNA was amplified with an oligonucleotide  
665 containing a 5' BamHI restriction site and the T7 promoter, and an oligonucleotide containing  
666 3' XhoI and DraI sites. The PCR-amplified product was cleaved with BamHI and XhoI and  
667 cloned into the equivalent sites in the pUC18 plasmid. A T7 RNA polymerase run-off  
668 transcription of the DraI-cut plasmid yielded a 522 nucleotide-long RNA with the same  
669 sequence as the endogenous SCR1 except the 5' adenosine was replaced with a guanosine to  
670 facilitate transcription. The SCR1 deletions were similarly constructed based on the secondary  
671 model of Van Nues and Brown (34). The SCR1 $\Delta$ S1 construct replaced residues 247–371 with  
672 a UUCG tetraloop, and the SCR1 $\Delta$ Alu construct deleted residues 1–155 and residues 454–  
673 522. The T7 RNA polymerase run-off transcriptions of the DraI-cut plasmids yielded 401 and  
674 303 nucleotide-long RNAs, respectively.

675 The actin control was a T7-promoter derivative of the previously described actin  
676 precursor RNA in the Bluescript KS(-) plasmid (93). A T7 RNA polymerase run-off

677 transcript of EcoRI-cut plasmid yielded a 605 nucleotide-long RNA containing, from 5' to 3',  
678 54 nucleotides of the plasmid, 63 nucleotides of the 5' UTR, 10 nucleotides of the 5' exon,  
679 309 nucleotides of the intron, 162 nucleotides of the 3' exon and 7 nucleotides of the plasmid.

680 The SRP genes (*SRP14*, *SRP21*, *SRP54*, *SRP68*, *SRP72*, *SEC65*) were PCR amplified  
681 off the pMW295 or pMW299 plasmids with oligonucleotides containing 5' SpeI and NdeI  
682 sites and 3' XhoI sites, and they were cloned into the SpeI and XhoI sites of the *2HA\_p424*  
683 plasmid containing an *ADH* promoter, two *HA* tags and a *CYCI* terminator (92). *SRP14* and  
684 *SRP21* also were cloned into the *GFP\_p413* plasmid. Except for *SRP68* and *SEC65*, all  
685 constructs were subcloned into the NdeI and XhoI sites of pET22b. *SRP68* and *SEC65* were  
686 re-amplified by PCR with oligonucleotides containing XhoI and BamHI sites and cloned into  
687 the equivalent sites of pET19b. *SRP101* and *SRP102* were amplified off purified  
688 chromosomal DNA using oligonucleotides with BamHI and XhoI sites and cloned into the  
689 equivalent sites of *2HA\_p424*. The constructs were subcloned into the NdeI and XhoI sites of  
690 pET22b. *SRP14Δ29Cter* and *SRP21Δ73Cter* were PCR amplified with the *HA* tag and cloned  
691 into the XbaI and XhoI sites of p413 (55). *SRP14Δ29Cter* and *SRP21Δ73Cter* were  
692 subsequently subcloned into the NdeI and XhoI sites of pET22b.

693 The *GFP* and *MCHERRY* plasmids were constructed by amplifying genes off the  
694 pYM27-*EGFP-KanMX4* and pFA6a-*mCherry-NatNT2* plasmids, respectively. The PCR  
695 products were digested with XhoI and Sall, gel purified, and cloned into the equivalent sites  
696 of the yeast plasmids p415, p416 and p413. The *DED1*, *ded1-F162C* and *ded1-DQAD*  
697 plasmids were as previously described (13). These genes were subcloned into the SpeI and  
698 XhoI sites of *GFP-p415*, p414 and *MCHERRY\_p416*. The *KAR2-RFP\_YIPlac204* was a gift  
699 from Benjamin Glick.

## 700 **Yeast strains and manipulations**

701 Manipulations of yeast, including media preparation, growth conditions, transformation, and  
702 5-FOA selection, were done according to standard procedures (94). The strains used in this  
703 study are listed in Supplementary Table 3.

704 The yeast GFP clone collection was purchased from Life Technologies (Ref 95702;  
705 Carlsbad, CA). The *sec61-ts* and *sec62-ts* yeast strains were a generous gift from Ron  
706 Deshaies (59). The *KAR2-RFP* strain was created by transforming the W303 (G49), *sec61* and  
707 *sec62* strains with EcoRV-linearized *KAR2-RFP\_YIPlac204* containing the N-terminus of  
708 *KAR2* (135 bp) fused to *DsRedExpress2* with the *HDEL ER*-retention sequence. The yeast  
709 *TET*-promoters Hughes Collection strains were purchased from Dharmacon (GE Healthcare,  
710 Lafayette, CO). Tetracycline-inducible strains were transformed with *GPD-DED1*, *GPD-*  
711 *ded1-F162C* or the empty plasmid. Cells were grown in YPD (yeast extract, peptone,  
712 dextrose) medium or in minimal medium lacking leucine (SD-LEU), serially diluted by a  
713 factor of 10 and then plated on medium with or without 10 µg/ml doxycycline.

#### 714 **T7-SCR1 constructs**

715 The oligonucleotides that were used are shown in Supplementary Table 1, where the regions  
716 of complementarity are underlined and restriction sites are shown in bold. The final constructs  
717 are listed in Supplementary Table 2.

718 The full-length T7-SCR1 was PCR amplified off the pMW299 plasmid (44) with the  
719 *SCR1\_up2* oligonucleotide containing the T7 promoter and *SCR1-low* oligonucleotides. The  
720 PCR product was digested with BamHI and XhoI, gel purified and cloned into the equivalent  
721 sites of pUC18. The T7-SCR1 $\Delta$ Alu was constructed with the *SCR1\_dAlu\_up* oligonucleotide  
722 containing the T7 promoter and the *SCR1\_dAlu\_low* oligonucleotide. The PCR product was  
723 digested with BamHI and HindIII, gel purified and cloned into the equivalent sites of pUC18.  
724 The T7-SCR1 $\Delta$ S1 construct was made as fusion PCRs with two sets of oligonucleotides. The  
725 pUC18\_5' oligonucleotide was used with *SCR1\_dS1\_low* and pUC18\_3' was used with

726 SCR1\_dS1\_up. The two gel-purified PCR fragments were combined and PCR amplified with  
727 oligonucleotides pUC18\_5' and pUC18\_3'. The PCR product was digested with BamHI and  
728 HindIII, gel purified and cloned into the equivalent sites of pUC18.

### 729 **Northern blot probes**

730 The oligonucleotides used are listed in Supplementary Table 1. Oligonucleotides (150  
731 pmoles) were 5' <sup>32</sup>P-labeled with 20 μCi of γ-<sup>32</sup>P ATP (3000 Ci/mmol; Hartmann Analytic)  
732 for 30 min at 37°C in 50 μl volumes with 20 units of T4 PNK (New England Biolabs) in the  
733 provided reaction buffer. Reactions were heat inactivated for 20 min at 65°C and the  
734 unincorporated radioactivity was eliminated with a G25 Illustra MicroSpin column (GE  
735 Healthcare) according to the manufacture's instructions. Labeling efficiency was determined  
736 by comparing the radioactivity of the recovered material with that retained on the column.  
737 Blots were incubated with 15 pmoles of probes overnight at 42°C. Blots were washed two  
738 times at 42°C with 2X SSC buffer (Euromedex, Souffelweyersheim, France) with 0.1% SDS  
739 added, washed two times with 0.2X SSC buffer with 0.1% SDS, dried and then subjected to  
740 autoradiography with a BAS-MS imaging plate (Fujifilm) overnight. Exposures were revealed  
741 with a Typhoon FLA9500 phosphoimager (GE Healthcare).

### 742 ***In situ* localization**

743 To analyze the location of Ded1 relative to the ER or SRP proteins, we first used the green  
744 fluorescent protein (GFP)-tagged *ded1-DQAD* plasmid that was transformed into *sec61-ts* and  
745 *sec62-ts* mutant strains with the integrated *KAR2-RFP* plasmid (Supplementary Tables 2 and  
746 3). Cells were grown in SD-LEU to an OD<sub>600</sub> of ~0.9–1.0 (logarithmic phase) at 24°C and  
747 then shifted to 37°C for 15 min. We subsequently used mCherry-tagged *ded1-DQAD* plasmid  
748 that was transformed into GFP-tagged *SRP14* and *SRP21* expressed from the chromosome  
749 (Supplementary Tables 2 and 3). Cells were grown in SD-LEU to an OD<sub>600</sub> of 0.95 at 30°C.  
750 Finally, GFP-tagged *SRP14* or *SRP21* and mCherry-tagged *ded1-DQAD* plasmids were

751 transformed in the *xpo1-T539C* strain (70). Cells were grown in minimal medium lacking  
752 histidine and uracil (SD-HIS-URA) to an OD<sub>600</sub> of 0.4 (early logarithmic phase) at 30°C, and  
753 then they were split into two parts: one-half was resuspended in SD-HIS-URA and the other  
754 in SD-HIS-URA supplemented with ~200 nM leptomycin for 1 h.

755 Fluorescence microscopy was done with a Zeiss Observer.Z1 microscope (Carl Zeiss  
756 Microscopy GmbH) with a 63x oil immersion objective equipped with the following filter  
757 sets: Alexa 489, filter set 10 from Zeiss for GFP (Excitation BP 450-490, Beam Splitter FT  
758 510, Emission BP 515/65), HC-mCherry, filter set F36-508 from AHF for mCherry and RFP  
759 (Excitation BP 562/40, Beam Splitter 593, Emission BP 641/75). Images were acquired with  
760 a SCMOS ORCA FLASH 4.0 charge-coupled device camera (Hamamatsu photonics) using  
761 the Zen 2012 Package Acquisition/Analysis software and processed with Zen 2012 and  
762 Photoshop CS3.

### 763 **RNA transcripts**

764 RNAs were produced as run-off transcripts using T7 RNA polymerase and the MEGAscript  
765 kit (Ambion Thermo Fisher Scientific, Waltham, MA) according to the manufacture's  
766 instructions. In brief, reactions were done in 20–40 µl volumes with 1–2 µg of linearized  
767 DNA and incubated for 5–6 h at 37°C. The template was then digested with TURBO DNase,  
768 multiple reactions were combined, the solution diluted to 500 µl final with high salt buffer  
769 (300 mM potassium acetate, 50 mM Tris-base, pH 8.0, 0.1 mM EDTA), extracted with an  
770 equal volume of water-saturated phenol (MP Biomedicals, CA), extracted with an equal  
771 volume of chloroform-isoamyl alcohol (24:1) and precipitated overnight at -20°C with 2.5–3  
772 volumes of ethanol. The RNA was recovered by centrifugation in an Eppendorf 5415R at  
773 high speed at 4°C for 15 min. The supernatant was discarded, the pellet washed with 300 µl  
774 of cold 70% ethanol, and the pellet dried in a SpinVac (Savant Thermo Fisher Scientific) for  
775 20 min. To eliminate trace contaminates, the RNA was resuspended in 400 µl high salt buffer



776 and re-ethanol precipitated at -20°C. The pellet was recovered, washed and dried. The final  
777 pellet was resuspended in 20 mM Tris-base, pH 7.5, 0.1 mM EDTA and stored at -20°C until  
778 needed. The concentration was determined using an absorbance at 260 nm of 32 µg/ml/cm,  
779 which was based on the calculated values of Oligo 7 software (Molecular Biology Insights,  
780 Inc, Colorado Springs, CO).

## 781 **Recombinant protein expression and purification**

782 Recombinant Ded1-His was expressed from the pET22b plasmid (Novagen) and purified as  
783 previously described (46). SRP His-tagged proteins were transformed into the Rosetta (DE3)  
784 *E. coli* strain. Cultures containing 500 ml of cells at OD<sub>600</sub> of 0.5 were induced with 0.5 mM  
785 isopropyl-1-thio-β-D-galactopyranoside (IPTG) for 1 h at 37°C for SRP14, Sec65 and  
786 SRP101; 16 h at 16°C for SRP68 and SRP72; and for 2 h at 30°C for SRP54 and SRP21.  
787 Cells were collected by centrifugation and the pellets were resuspended in 5 ml of lysis buffer  
788 containing 20 mM Tris-base, pH 8.0, 0.5 M NaCl and the following protein-specific  
789 conditions: 20 mM imidazole, 8 mM β-mercaptoethanol and 1% Triton X-100 for SRP14,  
790 SRP68, SP101 and Sec65; 20 mM imidazole and 3 mM β-mercaptoethanol for SRP21; 10  
791 mM imidazole and 3 mM β-mercaptoethanol for SRP54; and 20 mM imidazole and 1mM β-  
792 mercaptoethanol for SRP72. The equivalent of 1 mg/ml lysozyme was added for each  
793 condition, the cells kept on ice for 30 min and then the cells were lysed by sonication at 4°C  
794 until the lysate became clear. The material was centrifuged for 40 min at 14,000 rpm in a JA-  
795 12 rotor (Beckman Coulter, Brea, CA) at 4°C and the supernatant was loaded onto a 1 ml  
796 nickel nitrilotriacetic acid-agarose column (Ni-NTA, Qiagen, Hilden, Germany) previously  
797 equilibrated with the corresponding lysis buffer. After two washes, the SRP His-tagged  
798 proteins were eluted with lysis buffer containing 150 mM imidazole. Purified proteins were  
799 supplemented in 50% glycerol and were quantified using the Bradford protein assay kit (Bio-  
800 Rad). Proteins were aliquoted and stored at -80°C until needed. Recombinant purified

801 proteins, supplemented with SDS sample buffer, were resolved by 12% SDS polyacrylamide  
802 gel (SDS-PAGE) and stained with Coomassie Blue (Instant Blue). The properties of the  
803 different proteins are shown summarized in Table 3 and the purified proteins shown in  
804 Supplementary Figure 1.

### 805 **Immunoglobulin G-protein A Sepharose-bead pull-down experiments**

806 The G50 yeast strain was transformed individually with *2HA\_p424* plasmids containing two  
807 amino-terminal HA tags and the genes for *SRP14*, *SRP21*, *SRP54*, *SEC65*, *SRP68*, *SRP72* and  
808 *SRP101*. Cells were grown to an OD<sub>600</sub> of 0.8–1 in minimal medium lacking tryptophan (SD-  
809 TRP), recovered by centrifugation, washed with cold water, frozen in liquid nitrogen and  
810 stored at -80°C until needed. The cells were resuspended in an equal volume of lysis buffer  
811 containing 20 mM HEPES, pH 7.4, 150 mM NaCl, 5 mM MgCl<sub>2</sub>, 0.1 mM EDTA, 5 mM DTT  
812 and 1X protease inhibitor cocktail (Roche cOmplete EDTA-Free). An equal volume of 425–  
813 600 µm glass beads (Sigma-Aldrich, St. Louis, MI) was added and the cells were broken by  
814 vortexing in a FastPrep-24 (M.P. Biomedicals) at 4°C with four cycles of 30 sec and 5 min  
815 rests. The cell debris was removed by centrifugation for 5 min at 6,000 rpm in an Eppendorf  
816 5415R centrifuge at 4°C. The lysates were further clarified by centrifugation two to three  
817 times at 13,000 rpm for 10 min each at 4°C. The protein concentrations were determined with  
818 a Bio-Rad Protein Assay kit according to the manufacture's instructions using bovine serum  
819 albumin (BSA) as a standard.

820 Protein A-Sepharose CL-4B beads (GE Healthcare) were prepared by first washing  
821 them twice in IPP150 buffer containing 20 mM Tris-base, pH 7.4, 150 mM NaCl, 0.1%  
822 Triton-X100, and 1 mM MgCl<sub>2</sub>. Then, 50 µl of beads was incubated overnight with mixing in  
823 10 volumes of IPP150 buffer at 4°C with 0.4 mg/ml BSA, 0.4 mg/ml heparin, and 20 µl of  
824 serum containing Ded1, SRP21, HA (Covalab, Bron, France) or pre-immune immunoglobulin  
825 G (IgG). The beads were washed three times with 800 µl of 1X PBS, and then mixed at 4°C

826 for 2 h with G50 extracts containing 300 µg of protein and 10 volumes of 1X PBS buffer  
827 supplemented with BSA and heparin. The beads were washed three times with 800 µl of 1X  
828 PBS, and the bound proteins eluted twice with 300 µl of 0.1 M glycine, pH 2.3 for 15 min at  
829 4°C with mixing. The pH of the eluted proteins was then adjusted to pH ~7 with NaOH.

### 830 **Other pull down experiments**

831 Protein A-Sepharose beads were prepared as described above. Ded1 or SRP21 IgG were  
832 crosslinked to beads with 0.2% glutaraldehyde as described previously (95) and were  
833 rigorously washed with 1X PBS. The equivalent of 4–6 µg of purified Ded1 and SRP proteins  
834 were incubated with 300 µl 1X PSB supplemented with 2 mM MgCl<sub>2</sub> for 45 min at 30°C.  
835 Fifteen µl of Protein A-Sepharose beads were directly added to the protein mixture and mixed  
836 by rotation for 1 h at 18°C. Prior to elution, beads were washed three times with 1X PBS. The  
837 bound proteins were eluted with 30 µl glycine, pH 2.3, for 15 min at 4°C on a rotating wheel  
838 platform. The acidity of the reaction was neutralized by adding NaOH. Co-  
839 immunoprecipitated purified proteins, supplemented with SDS sample buffer, were resolved  
840 on a 12% SDS-PAGE and stained with Coomassie Blue.

### 841 **Western blot analysis**

842 The eluted proteins were concentrated by making the solution 150 µg/ml in sodium  
843 deoxycholate and the proteins precipitated with 15%, final, of trichloroacetic acid (TCA) for  
844 16 h at 4°C. The solution was centrifuged 30 min in an Eppendorf 5415R centrifuge at high  
845 speed, and the recovered pellet washed with cold acetone, dried and resuspended in loading  
846 buffer containing 50 mM Tris-base, pH 6.8, 2% sodium dodecyl sulfate (SDS), 1% β-  
847 mercaptoethanol, 0.02% bromophenol blue and 10% glycerol. The eluted proteins were  
848 separated on SDS-Laemmli gels, transferred to Amersham Protran nitrocellulose membranes  
849 (GE Healthcare Life Science) and probed with primary IgG against Ded1, SRP21, Sec65 or  
850 HA. The anti-Sec65 antibody was a generous gift from Martin R. Pool. Horseradish

851 peroxidase-conjugated anti-rabbit (for Ded1, Sec65, SRP21; Covalab) and anti-mouse (for  
852 HA; Covalab) were used as secondary antibodies, and the signals were revealed with a Clarity  
853 Western ECL Substrate kit (Bio-Rad, Hercules, CA) using a Bio-Rad ChemiDoc XRS+ and  
854 Image Lab 5.2 software. The Ded1-IgG and SRP21-IgG were produced by Covalab using  
855 purified recombinant Ded1 or SRP21, respectively.

### 856 **Polysome sucrose gradients**

857 G50 yeast strains containing HA-tagged SRP proteins were grown to an OD<sub>600</sub> of 0.8–1.0 in  
858 SD-TRP, cycloheximide (Sigma Aldrich) was added to a final concentration of 50 µg/ml, and  
859 the cells were incubated on ice for 10 min. Cells were harvested by centrifugation, washed  
860 with a lysis buffer containing 10 mM Tris-base, pH 7.4, 100 mM NaCl, 5 mM MgCl<sub>2</sub>, 0.1  
861 mg/ml cycloheximide, 1 mM DTT and 1X cOmplete EDTA-free protease inhibitor cocktail  
862 (Roche), the pelleted cells were then frozen in liquid nitrogen and stored at -80°C until  
863 needed.

864 Cells were resuspended in an equal volume of lysis buffer, one volume of 425–600  
865 µm glass beads was added, and then the cells were lysed in a FastPrep-24 as described above.  
866 Cell debris was removed by centrifugation in a Beckman JA-12 rotor at 6000 rpm for 5 min at  
867 4°C, and then the lysates were further clarified by centrifugation in an Eppendorf 5415R  
868 centrifuge at 13,000 rpm for 10 min at 4°C. The equivalent of 200 µl of cell extract with an  
869 OD<sub>260</sub> of 12 was loaded onto a 10–50% sucrose gradient and centrifuged in a SW41 rotor  
870 (Beckman Coulter) at 39,000 rpm for 2.45 h at 4°C. Half milliliter fractions from the gradient  
871 were collected with a Retriever 500 (ISCO) fraction collector and monitored with a UV-6  
872 UV/VIS detector (ISCO) at 254 nm. Fractions were subsequently split in half for either RNA  
873 extraction or Western blot analysis.

874 The protein fractions were concentrated by adding 150 µg/ml, final, of sodium  
875 deoxycholate and then the solutions were made 15% in TCA, centrifuged in an Eppendorf

876 5415R, the recovered pellets were washed twice with cold acetone, and then the protein  
877 pellets were dried. The recovered material was resuspended in SDS loading buffer, separated  
878 by electrophoresis on a 12% SDS-PAGE gel and electrophoretically transferred to  
879 nitrocellulose membranes. The Western blots were undertaken as described above.

880 The RNA fractions were made 0.3 M in potassium acetate, extracted with an equal  
881 volume of water-saturated phenol, extracted twice with an equal volume of chloroform-  
882 isoamyl alcohol (24:1), and then ethanol precipitated overnight at -20°C. The RNA was  
883 recovered by centrifugation, dried, resuspended in 1X RNA loading buffer (Thermo  
884 Scientific), and then electrophoretically separated on a 6% polyacrylamide gel containing 7 M  
885 urea and ethidium bromide (to reveal 18S and 23S rRNAs). The RNA were subsequently  
886 electrophoretically transferred to Amersham Hybond-N+ nylon membranes (GE Healthcare)  
887 and probed with a <sup>32</sup>P-labeled DNA oligonucleotide specific for SCR1 (Supplementary Table  
888 1). The image was visualized with a Typhoon FLA9500 phosphoimager (GE Healthcare).

### 889 **Reverse-transcriptase PCR**

890 Samples were digested with Proteinase K by adding 1 mg/ml proteinase K (Sigma #P2308-  
891 100MG), 1% triton X-100, 0.5% SDS, 5 mM CaCl<sub>2</sub> in an Eppendorf Thermomixer Comfort  
892 (15 sec 1000 rpm, 90 sec rest) at 55°C for 35 min. Total RNA (input condition) and RNA  
893 from the eluate were recovered by the addition of 0.3 M potassium acetate, extracted with an  
894 equal volume of water-saturated phenol, extracted twice with an equal volume of chloroform-  
895 isoamyl alcohol (24:1), and then ethanol precipitated overnight at -20°C. The RNA pellets  
896 from the ethanol precipitations were resuspended in 20 µl nuclease-free water. RNA was  
897 reverse transcribed with the Superscript III kit (Invitrogen, Carlsbad, CA) according to the  
898 manufacture's instructions. In brief, 4.6 µl of the resuspended Ded1, pre-immune IgG pull-  
899 downs, and 0.5 µg of total yeast RNA were combined with 1 pmole of the 3' primers specific  
900 for SCR1, PGK1 or RPL20B RNAs (Supplementary Table 1). The reactions were heated to

901 50°C for 5 min and then 10 mM DTT, 0.75 µl of Superscript III Reverse Transcriptase (RT),  
902 1X final of RT buffer and 3 mM final of dNTPs were added. The reactions were incubated for  
903 90 min at 50°C. The RNAs were hydrolyzed by adding 40 µl of a solution with 150 mM  
904 KOH, 20 mM Tris-base and incubating at 90°C for 10 min. The solution was neutralized by  
905 adding 40 µl of 150 mM HCl. The PCR amplification was performed with 10 µl of the  
906 reverse transcriptase product in a 50 µl PCR mix containing 1 unit of Phusion High-Fidelity  
907 DNA polymerase (New England Biolabs, Évry-Courcouronnes, France), 1X HF Phusion  
908 buffer, 0.2 mM dNTPs, and 0.5 pmoles of the respective gene-specific 5' and 3' primers  
909 (Supplementary Table 1). PCR reactions were done for 25 cycles in a Bio-Rad T100 Thermal  
910 Cycler. PCR products were purified with a NucleoSpin Gel and PCR Clean-up kit (Macherey-  
911 Nagel, Düren, Germany), eluted with 50 µl elution buffer and 5 µl aliquots were analyzed  
912 with agarose loading buffer on a 2% agarose gel containing ethidium bromide

### 913 ***In vitro* RNA-dependent ATPase activities**

914 The ATPase assays were based on a colorimetric assay using molybdate-Malachite green as  
915 previously described (46). We typically used 23 nM of SCR1 or actin RNA and 0.14 µg/µl of  
916 whole yeast RNA (Roche) that was purified on a DEAE-Sepharose column to remove  
917 inhibitors. For the latter RNA, fractions from an elution with increasing concentrations of  
918 NaCl were assayed with purified Ded1, and the most active fractions were combined,  
919 concentrated by ethanol precipitation and subsequently used in the assays. The poly(A) RNA  
920 was from Sigma. Assays were performed in a reaction mix with 20 mM Tris-base, pH 7.5, 50  
921 mM potassium acetate, 5 mM magnesium acetate, 0.1 µg/µl BSA, and 2 mM DTT. Purified  
922 proteins and RNAs were pre-incubated for 30 min at 30°C to equilibrate the different  
923 components. We used the Ded1-K192A (GAT) mutant in motif I as a negative control as it  
924 had no detectable ATPase activity (46). Reactions were started by adding 1 mM final of ATP  
925 and taking aliquots over the time course. The reactions were stopped by making the solutions

926 approximately 60 mM final in EDTA. The Malachite green solution was added as previously  
927 described (46) and the absorption measured with a Tecan NanoQuant Infinite M200Pro  
928 microtiter plate reader at 630 nm. Enzymatic reaction velocities were determined by a linear  
929 regression fit over the initial linear phase of the reaction with five data points over a time  
930 course of 45 min using optimized protein concentrations. We used a serial dilution of  
931 Phosphate Phosphorous Standard for IC (Fluka Sigma-Aldrich) for each experiment to  
932 determine the corresponding phosphate concentration from the absorption. Experimental data  
933 were analyzed with Kaleidagraph 4.5.2 software (Synergy, Reading PA).

#### 934 **Electrophoretic mobility-shift assays**

935 An EMSA-agarose technique was used as previously described with minor modifications  
936 (96). Briefly, the assay were performed with 0.150  $\mu$ M SCR1 or actin RNA and variable  
937 concentrations of the indicated proteins, which were incubated together in 1X EMSA buffer  
938 (20 mM Tris-base, pH 8.8, 70 mM KOAc, 2 mM MgCl<sub>2</sub>, 10  $\mu$ g/ $\mu$ l BSA, 1 mM DTT) for 15  
939 min at 30°C in the presence or absence of 5 mM AMP-PNP or ATP in a volume of 8  $\mu$ l. Two  
940  $\mu$ l of 30% glycerol was added to the samples, and they were loaded onto 0.75 mm thick, 1%  
941 agarose (Molecular Biology Grade) gels containing 1X TBE buffer (45 mM Tris-base, 45  
942 mM boric acid, pH 8.8, and 2 mM EDTA; Sigma) and ~0.016  $\mu$ g/ml ethidium bromide. Gels  
943 were run in a mini-plus horizontal electrophoresis (Scie-Plas) in 1X TBE buffer at 220V for  
944 ~13 min at 4°C and were imaged with a Gel Doc XR+ (Bio-RAD) and Quantity One 4.6.9  
945 software (Bio-Rad).

#### 946 **ACKNOWLEDGMENTS**

947 We thank Caroline Lacoux and Stéphanie Ørum for helpful discussions, Martin R Pool for the  
948 Sec65 IgG and for the pMW295 and pMW299 SRP plasmids, Benjamin Glick for the *KAR2*-  
949 *RFP\_YIPlac204*, Jiří Hašek for the pFA6a-mCherry-NatNT2 plasmid, Michael Lisby and

950 Rodney Rothstein for the G49 and G50 yeast strains, and Claude Thermes, Yves Daubenton,  
951 Erwin Van Dijk, Yan Jaszczyszyn, Pauline Francois, Marina Cavaiuolo and Benoist Laurent  
952 for help with RNAseq.

### 953 **FUNDING**

954 This work was supported by Centre National de la Recherche Scientifique; HeliDEAD grant  
955 [grant number ANR-13- BSV8-0009-01 to NKT] from the Agence Nationale de la Recherche;  
956 and Initiative d'Excellence program from the French State grant DYNAMO [grant number  
957 ANR-11-LABX-0011-01]. Funding for open access charge: Centre National de la Recherche  
958 Scientifique.

959 *Conflict of interest statement.* None declared.

### 960 **REFERENCES**

- 961 1. Cordin, O., Banroques, J., Tanner, N.K. and Linder, P. (2006) The DEAD-box protein  
962 family of RNA helicases. *Gene*, **367**, 17-37. 10.1016/j.gene.2005.10.019
- 963 2. Linder, P. and Jankowsky, E. (2011) From unwinding to clamping - the DEAD box  
964 RNA helicase family. *Nat Rev Mol Cell Biol*, **12**, 505-516. 10.1038/nrm3154
- 965 3. Putnam, A.A. and Jankowsky, E. (2013) DEAD-box helicases as integrators of RNA,  
966 nucleotide and protein binding. *Biochim Biophys Acta*, **1829**, 884-893.  
967 10.1016/j.bbagrm.2013.02.002
- 968 4. Byrd, A.K. and Raney, K.D. (2012) Superfamily 2 helicases. *Front Biosci (Landmark*  
969 *Ed)*, **17**, 2070-2088. 10.2741/4038
- 970 5. Fairman-Williams, M.E., Guenther, U.P. and Jankowsky, E. (2010) SF1 and SF2  
971 helicases: family matters. *Curr Opin Struct Biol*, **20**, 313-324.  
972 10.1016/j.sbi.2010.03.011



- 973 6. Raj, S., Bagchi, D., Orero, J.V., Banroques, J., Tanner, N.K. and Croquette, V. (2019)  
974 Mechanistic characterization of the DEAD-box RNA helicase Ded1 from yeast as  
975 revealed by a novel technique using single-molecule magnetic tweezers. *Nucleic Acids*  
976 *Res*, **47**, 3699-3710. 10.1093/nar/gkz057
- 977 7. Ozgur, S., Buchwald, G., Falk, S., Chakrabarti, S., Prabu, J.R. and Conti, E. (2015)  
978 The conformational plasticity of eukaryotic RNA-dependent ATPases. *FEBS J*, **282**,  
979 850-863. 10.1111/febs.13198
- 980 8. Liu, F., Putnam, A.A. and Jankowsky, E. (2014) DEAD-box helicases form  
981 nucleotide-dependent, long-lived complexes with RNA. *Biochemistry*, **53**, 423-433.  
982 10.1021/bi401540q
- 983 9. Sharma, D. and Jankowsky, E. (2014) The Ded1/DDX3 subfamily of DEAD-box  
984 RNA helicases. *Crit Rev Biochem Mol Biol*, **49**, 343-360.  
985 10.3109/10409238.2014.931339
- 986 10. Chang, T.C. and Liu, W.S. (2010) The molecular evolution of PL10 homologs. *BMC*  
987 *Evol Biol*, **10**, 127. 10.1186/1471-2148-10-127
- 988 11. Tarn, W.Y. and Chang, T.H. (2009) The current understanding of Ded1p/DDX3  
989 homologs from yeast to human. *RNA Biol*, **6**, 17-20. 10.4161/rna.6.1.7440
- 990 12. Rosner, A. and Rinkevich, B. (2007) The DDX3 subfamily of the DEAD box  
991 helicases: divergent roles as unveiled by studying different organisms and *in vitro*  
992 assays. *Curr Med Chem*, **14**, 2517-2525. 10.2174/092986707782023677
- 993 13. Senissar, M., Le Saux, A., Belgareh-Touze, N., Adam, C., Banroques, J. and Tanner,  
994 N.K. (2014) The DEAD-box helicase Ded1 from yeast is an mRNP cap-associated  
995 protein that shuttles between the cytoplasm and nucleus. *Nucleic Acids Res*, **42**,  
996 10005-10022. 10.1093/nar/gku584

- 997 14. Gupta, N., Lorsch, J.R. and Hinnebusch, A.G. (2018) Yeast Ded1 promotes 48S  
998 translation pre-initiation complex assembly in an mRNA-specific and eIF4F-  
999 dependent manner. *Elife*, **7**. 10.7554/eLife.38892
- 1000 15. Dever, T.E., Kinzy, T.G. and Pavitt, G.D. (2016) Mechanism and Regulation of  
1001 Protein Synthesis in *Saccharomyces cerevisiae*. *Genetics*, **203**, 65-107.  
1002 10.1534/genetics.115.186221
- 1003 16. Gulay, S., Gupta, N., Lorsch, J.R. and Hinnebusch, A.G. (2020) Distinct interactions  
1004 of eIF4A and eIF4E with RNA helicase Ded1 stimulate translation *in vivo*. *Elife*, **9**.  
1005 10.7554/eLife.58243
- 1006 17. Aryanpur, P.P., Regan, C.A., Collins, J.M., Mittelmeier, T.M., Renner, D.M., Vergara,  
1007 A.M., Brown, N.P. and Bolger, T.A. (2017) Gle1 Regulates RNA Binding of the  
1008 DEAD-Box Helicase Ded1 in Its Complex Role in Translation Initiation. *Mol Cell*  
1009 *Biol*, **37**. 10.1128/mcb.00139-17
- 1010 18. Hauk, G. and Bowman, G.D. (2015) Formation of a Trimeric Xpo1-Ran[GTP]-Ded1  
1011 Exportin Complex Modulates ATPase and Helicase Activities of Ded1. *PLoS One*, **10**,  
1012 e0131690. 10.1371/journal.pone.0131690
- 1013 19. Ivanov, P., Kedersha, N. and Anderson, P. (2019) Stress Granules and Processing  
1014 Bodies in Translational Control. *Cold Spring Harb Perspect Biol*, **11**.  
1015 10.1101/cshperspect.a032813
- 1016 20. Youn, J.Y., Dyakov, B.J.A., Zhang, J., Knight, J.D.R., Vernon, R.M., Forman-Kay,  
1017 J.D. and Gingras, A.C. (2019) Properties of Stress Granule and P-Body Proteomes.  
1018 *Mol Cell*, **76**, 286-294. 10.1016/j.molcel.2019.09.014
- 1019 21. Guzikowski, A.R., Chen, Y.S. and Zid, B.M. (2019) Stress-induced mRNP granules:  
1020 Form and function of processing bodies and stress granules. *Wiley Interdiscip Rev*  
1021 *RNA*, **10**, e1524. 10.1002/wrna.1524

- 1022 22. Hondele, M., Sachdev, R., Heinrich, S., Wang, J., Vallotton, P., Fontoura, B.M.A. and  
1023 Weis, K. (2019) DEAD-box ATPases are global regulators of phase-separated  
1024 organelles. *Nature*, **573**, 144-148. 10.1038/s41586-019-1502-y
- 1025 23. Soto-Rifo, R. and Ohlmann, T. (2013) The role of the DEAD-box RNA helicase  
1026 DDX3 in mRNA metabolism. *Wiley Interdiscip Rev RNA*, **4**, 369-385.  
1027 10.1002/wrna.1165
- 1028 24. Spitzer, J., Hafner, M., Landthaler, M., Ascano, M., Farazi, T., Wardle, G., Nusbaum,  
1029 J., Khorshid, M., Burger, L., Zavolan, M. *et al.* (2014) PAR-CLIP (Photoactivatable  
1030 Ribonucleoside-Enhanced Crosslinking and Immunoprecipitation): a step-by-step  
1031 protocol to the transcriptome-wide identification of binding sites of RNA-binding  
1032 proteins. *Methods Enzymol*, **539**, 113-161. 10.1016/b978-0-12-420120-0.00008-6
- 1033 25. Hafner, M., Landthaler, M., Burger, L., Khorshid, M., Hausser, J., Berninger, P.,  
1034 Rothballer, A., Ascano, M., Jr., Jungkamp, A.C., Munschauer, M. *et al.* (2010)  
1035 Transcriptome-wide identification of RNA-binding protein and microRNA target sites  
1036 by PAR-CLIP. *Cell*, **141**, 129-141. 10.1016/j.cell.2010.03.009
- 1037 26. Rapoport, T.A., Li, L. and Park, E. (2017) Structural and Mechanistic Insights into  
1038 Protein Translocation. *Annu Rev Cell Dev Biol*, **33**, 369-390. 10.1146/annurev-cellbio-  
1039 100616-060439
- 1040 27. Wild, K., Becker, M.M.M., Kempf, G. and Sinning, I. (2019) Structure, dynamics and  
1041 interactions of large SRP variants. *Biol Chem*, **401**, 63-80. 10.1515/hsz-2019-0282
- 1042 28. Cui, X.A. and Palazzo, A.F. (2014) Localization of mRNAs to the endoplasmic  
1043 reticulum. *Wiley Interdiscip Rev RNA*, **5**, 481-492. 10.1002/wrna.1225
- 1044 29. Akopian, D., Shen, K., Zhang, X. and Shan, S.O. (2013) Signal recognition particle:  
1045 an essential protein-targeting machine. *Annu Rev Biochem*, **82**, 693-721.  
1046 10.1146/annurev-biochem-072711-164732

- 1047 30. Pool, M.R. (2005) Signal recognition particles in chloroplasts, bacteria, yeast and  
1048 mammals (review). *Mol Membr Biol*, **22**, 3-15. 10.1080/09687860400026348
- 1049 31. Rosenblad, M.A., Larsen, N., Samuelsson, T. and Zwieb, C. (2009) Kinship in the  
1050 SRP RNA family. *RNA Biol*, **6**, 508-516. 10.4161/rna.6.5.9753
- 1051 32. Massenet, S. (2019) *In vivo* assembly of eukaryotic signal recognition particle: A still  
1052 enigmatic process involving the SMN complex. *Biochimie*, **164**, 99-104.  
1053 10.1016/j.biochi.2019.04.007
- 1054 33. Zwieb, C., van Nues, R.W., Rosenblad, M.A., Brown, J.D. and Samuelsson, T. (2005)  
1055 A nomenclature for all signal recognition particle RNAs. *RNA*, **11**, 7-13.  
1056 10.1261/rna.7203605
- 1057 34. Van Nues, R.W. and Brown, J.D. (2004) *Saccharomyces* SRP RNA secondary  
1058 structures: a conserved S-domain and extended Alu-domain. *RNA*, **10**, 75-89.  
1059 10.1261/rna.5137904
- 1060 35. Nyathi, Y., Wilkinson, B.M. and Pool, M.R. (2013) Co-translational targeting and  
1061 translocation of proteins to the endoplasmic reticulum. *Biochim Biophys Acta*, **1833**,  
1062 2392-2402. 10.1016/j.bbamcr.2013.02.021
- 1063 36. Strub, K., Fornallaz, M. and Bui, N. (1999) The Alu domain homolog of the yeast  
1064 signal recognition particle consists of an Srp14p homodimer and a yeast-specific RNA  
1065 structure. *RNA*, **5**, 1333-1347. 10.1017/s1355838299991045
- 1066 37. Mason, N., Ciufo, L.F. and Brown, J.D. (2000) Elongation arrest is a physiologically  
1067 important function of signal recognition particle. *EMBO J*, **19**, 4164-4174.  
1068 10.1093/emboj/19.15.4164
- 1069 38. Rosenblad, M.A., Zwieb, C. and Samuelsson, T. (2004) Identification and  
1070 comparative analysis of components from the signal recognition particle in protozoa  
1071 and fungi. *BMC Genomics*, **5**, 5. 10.1186/1471-2164-5-5

- 1072 39. Halic, M., Becker, T., Pool, M.R., Spahn, C.M., Grassucci, R.A., Frank, J. and  
1073 Beckmann, R. (2004) Structure of the signal recognition particle interacting with the  
1074 elongation-arrested ribosome. *Nature*, **427**, 808-814. 10.1038/nature02342
- 1075 40. Bousset, L., Mary, C., Brooks, M.A., Scherrer, A., Strub, K. and Cusack, S. (2014)  
1076 Crystal structure of a signal recognition particle Alu domain in the elongation arrest  
1077 conformation. *RNA*, **20**, 1955-1962. 10.1261/rna.047209.114
- 1078 41. Wild, K., Juare, K.D., Soni, K., Shanmuganathan, V., Hendricks, A., Segnitz, B.,  
1079 Beckmann, R. and Sinning, I. (2019) Reconstitution of the human SRP system and  
1080 quantitative and systematic analysis of its ribosome interactions. *Nucleic Acids Res*,  
1081 **47**, 3184-3196. 10.1093/nar/gky1324
- 1082 42. Ho, B., Baryshnikova, A. and Brown, G.W. (2018) Unification of Protein Abundance  
1083 Datasets Yields a Quantitative *Saccharomyces cerevisiae* Proteome. *Cell Syst*, **6**, 192-  
1084 205.e193. 10.1016/j.cels.2017.12.004
- 1085 43. Guenther, U.P., Weinberg, D.E., Zubradt, M.M., Tedeschi, F.A., Stawicki, B.N.,  
1086 Zagore, L.L., Brar, G.A., Licatalosi, D.D., Bartel, D.P., Weissman, J.S. *et al.* (2018)  
1087 The helicase Ded1p controls use of near-cognate translation initiation codons in 5'  
1088 UTRs. *Nature*, **559**, 130-134. 10.1038/s41586-018-0258-0
- 1089 44. Willer, M., Jermy, A.J., Steel, G.J., Garside, H.J., Carter, S. and Stirling, C.J. (2003)  
1090 An *in vitro* assay using overexpressed yeast SRP demonstrates that cotranslational  
1091 translocation is dependent upon the J-domain of Sec63p. *Biochemistry*, **42**, 7171-  
1092 7177. 10.1021/bi0343951
- 1093 45. Ciufu, L.F. and Brown, J.D. (2000) Nuclear export of yeast signal recognition particle  
1094 lacking Srp54p by the Xpo1p/Crm1p NES-dependent pathway. *Curr Biol*, **10**, 1256-  
1095 1264. 10.1016/s0960-9822(00)00743-0

- 1096 46. Cordin, O., Tanner, N.K., Doere, M., Linder, P. and Banroques, J. (2004) The newly  
1097 discovered Q motif of DEAD-box RNA helicases regulates RNA-binding and helicase  
1098 activity. *EMBO J*, **23**, 2478-2487. 10.1038/sj.emboj.7600272
- 1099 47. Brown, J.D., Hann, B.C., Medzihradzsky, K.F., Niwa, M., Burlingame, A.L. and  
1100 Walter, P. (1994) Subunits of the *Saccharomyces cerevisiae* signal recognition particle  
1101 required for its functional expression. *EMBO J*, **13**, 4390-4400.
- 1102 48. Hann, B.C. and Walter, P. (1991) The signal recognition particle in *S. cerevisiae*. *Cell*,  
1103 **67**, 131-144. 10.1016/0092-8674(91)90577-1
- 1104 49. Stirling, C.J. and Hewitt, E.W. (1992) The *S. cerevisiae* *SEC65* gene encodes a  
1105 component of yeast signal recognition particle with homology to human SRP19.  
1106 *Nature*, **356**, 534-537. 10.1038/356534a0
- 1107 50. Ogg, S.C., Poritz, M.A. and Walter, P. (1992) Signal recognition particle receptor is  
1108 important for cell growth and protein secretion in *Saccharomyces cerevisiae*. *Mol Biol*  
1109 *Cell*, **3**, 895-911. 10.1091/mbc.3.8.895
- 1110 51. Mutka, S.C. and Walter, P. (2001) Multifaceted physiological response allows yeast to  
1111 adapt to the loss of the signal recognition particle-dependent protein-targeting  
1112 pathway. *Mol Biol Cell*, **12**, 577-588. 10.1091/mbc.12.3.577
- 1113 52. Hughes, T.R., Marton, M.J., Jones, A.R., Roberts, C.J., Stoughton, R., Armour, C.D.,  
1114 Bennett, H.A., Coffey, E., Dai, H., He, Y.D. *et al.* (2000) Functional discovery via a  
1115 compendium of expression profiles. *Cell*, **102**, 109-126. 10.1016/s0092-  
1116 8674(00)00015-5
- 1117 53. Beckham, C., Hilliker, A., Cziko, A.M., Noueir, A., Ramaswami, M. and Parker, R.  
1118 (2008) The DEAD-box RNA helicase Ded1p affects and accumulates in  
1119 *Saccharomyces cerevisiae* P-bodies. *Mol Biol Cell*, **19**, 984-993. 10.1091/mbc.e07-09-  
1120 0954

- 1121 54. Banroques, J., Cordin, O., Doère, M., Linder, P. and Tanner, N.K. (2011) Analyses of  
1122 the functional regions of DEAD-box RNA "helicases" with deletion and chimera  
1123 constructs tested *in vivo* and *in vitro*. *J Mol Biol*, **413**, 451-472.  
1124 10.1016/j.jmb.2011.08.032
- 1125 55. Mumberg, D., Muller, R. and Funk, M. (1995) Yeast vectors for the controlled  
1126 expression of heterologous proteins in different genetic backgrounds. *Gene*, **156**, 119-  
1127 122. 10.1016/0378-1119(95)00037-7
- 1128 56. Chuang, R.Y., Weaver, P.L., Liu, Z. and Chang, T.H. (1997) Requirement of the  
1129 DEAD-Box protein Ded1p for messenger RNA translation. *Science*, **275**, 1468-1471.  
1130 10.1126/science.275.5305.1468
- 1131 57. Beckham, C., Hilliker, A., Cziko, A.M., Noueir, A., Ramaswami, M. and Parker, R.  
1132 (2012) Erratum: The DEAD-box RNA helicase Ded1p affects and accumulates in  
1133 *Saccharomyces cerevisiae* P-bodies. *Mol Biol Cell*, **23**, 2818.
- 1134 58. Iserman, C., Desroches Altamirano, C., Jegers, C., Friedrich, U., Zarin, T., Fritsch,  
1135 A.W., Mittasch, M., Domingues, A., Hersemann, L., Jahnel, M. *et al.* (2020)  
1136 Condensation of Ded1p Promotes a Translational Switch from Housekeeping to Stress  
1137 Protein Production. *Cell*, **181**, 818-831.e819. 10.1016/j.cell.2020.04.009
- 1138 59. Deshaies, R.J. and Schekman, R. (1987) A yeast mutant defective at an early stage in  
1139 import of secretory protein precursors into the endoplasmic reticulum. *J Cell Biol*,  
1140 **105**, 633-645. 10.1083/jcb.105.2.633
- 1141 60. Deshaies, R.J. and Schekman, R. (1989) SEC62 encodes a putative membrane protein  
1142 required for protein translocation into the yeast endoplasmic reticulum. *J Cell Biol*,  
1143 **109**, 2653-2664. 10.1083/jcb.109.6.2653
- 1144 61. Nishikawa, S.I., Fewell, S.W., Kato, Y., Brodsky, J.L. and Endo, T. (2001) Molecular  
1145 chaperones in the yeast endoplasmic reticulum maintain the solubility of proteins for

- 1146 retrotranslocation and degradation. *J Cell Biol*, **153**, 1061-1070.
- 1147 10.1083/jcb.153.5.1061
- 1148 62. West, M., Zurek, N., Hoenger, A. and Voeltz, G.K. (2011) A 3D analysis of yeast ER  
1149 structure reveals how ER domains are organized by membrane curvature. *J Cell Biol*,  
1150 **193**, 333-346. 10.1083/jcb.201011039
- 1151 63. Babu, M., Vlasblom, J., Pu, S., Guo, X., Graham, C., Bean, B.D., Burston, H.E.,  
1152 Vizeacoumar, F.J., Snider, J., Phanse, S. *et al.* (2012) Interaction landscape of  
1153 membrane-protein complexes in *Saccharomyces cerevisiae*. *Nature*, **489**, 585-589.  
1154 10.1038/nature11354
- 1155 64. Wild, K. and Sinning, I. (2014) RNA gymnastics in mammalian signal recognition  
1156 particle assembly. *RNA Biol*, **11**, 1330-1334. 10.1080/15476286.2014.996457
- 1157 65. Leung, E. and Brown, J.D. (2010) Biogenesis of the signal recognition particle.  
1158 *Biochem Soc Trans*, **38**, 1093-1098. 10.1042/bst0381093
- 1159 66. Grosshans, H., Deinert, K., Hurt, E. and Simos, G. (2001) Biogenesis of the signal  
1160 recognition particle (SRP) involves import of SRP proteins into the nucleolus,  
1161 assembly with the SRP-RNA, and Xpo1p-mediated export. *J Cell Biol*, **153**, 745-762.  
1162 10.1083/jcb.153.4.745
- 1163 67. Baßler, J. and Hurt, E. (2019) Eukaryotic Ribosome Assembly. *Annu Rev Biochem*,  
1164 **88**, 281-306. 10.1146/annurev-biochem-013118-110817
- 1165 68. Yedavalli, V.S., Neuveut, C., Chi, Y.H., Kleiman, L. and Jeang, K.T. (2004)  
1166 Requirement of DDX3 DEAD box RNA helicase for HIV-1 Rev-RRE export  
1167 function. *Cell*, **119**, 381-392. 10.1016/j.cell.2004.09.029
- 1168 69. Nishi, K., Yoshida, M., Fujiwara, D., Nishikawa, M., Horinouchi, S. and Beppu, T.  
1169 (1994) Leptomycin B targets a regulatory cascade of crm1, a fission yeast nuclear



- 1170 protein, involved in control of higher order chromosome structure and gene  
1171 expression. *J Biol Chem*, **269**, 6320-6324.
- 1172 70. Neville, M. and Rosbash, M. (1999) The NES-Crm1p export pathway is not a major  
1173 mRNA export route in *Saccharomyces cerevisiae*. *EMBO J*, **18**, 3746-3756.  
1174 10.1093/emboj/18.13.3746
- 1175 71. Hann, B.C., Stirling, C.J. and Walter, P. (1992) SEC65 gene product is a subunit of  
1176 the yeast signal recognition particle required for its integrity. *Nature*, **356**, 532-533.  
1177 10.1038/356532a0
- 1178 72. Iost, I., Dreyfus, M. and Linder, P. (1999) Ded1p, a DEAD-box protein required for  
1179 translation initiation in *Saccharomyces cerevisiae*, is an RNA helicase. *J Biol Chem*,  
1180 **274**, 17677-17683. 10.1074/jbc.274.25.17677
- 1181 73. Banroques, J., Cordin, O., Doère, M., Linder, P. and Tanner, N.K. (2008) A conserved  
1182 phenylalanine of motif IV in superfamily 2 helicases is required for cooperative, ATP-  
1183 dependent binding of RNA substrates in DEAD-box proteins. *Mol Cell Biol*, **28**, 3359-  
1184 3371. 10.1128/mcb.01555-07
- 1185 74. Valentin-Vega, Y.A., Wang, Y.D., Parker, M., Patmore, D.M., Kanagaraj, A., Moore,  
1186 J., Rusch, M., Finkelstein, D., Ellison, D.W., Gilbertson, R.J. *et al.* (2016) Cancer-  
1187 associated DDX3X mutations drive stress granule assembly and impair global  
1188 translation. *Sci Rep*, **6**, 25996. 10.1038/srep25996
- 1189 75. Schäfer, T., Strauss, D., Petfalski, E., Tollervey, D. and Hurt, E. (2003) The path from  
1190 nucleolar 90S to cytoplasmic 40S pre-ribosomes. *EMBO J*, **22**, 1370-1380.  
1191 10.1093/emboj/cdg121
- 1192 76. Mayr, C. (2019) What Are 3' UTRs Doing? *Cold Spring Harb Perspect Biol*, **11**.  
1193 10.1101/cshperspect.a034728

- 1194 77. Chartron, J.W., Hunt, K.C. and Frydman, J. (2016) Cotranslational signal-independent  
1195 SRP preloading during membrane targeting. *Nature*, **536**, 224-228.  
1196 10.1038/nature19309
- 1197 78. Voorhees, R.M. and Hegde, R.S. (2016) Toward a structural understanding of co-  
1198 translational protein translocation. *Curr Opin Cell Biol*, **41**, 91-99.  
1199 10.1016/j.ceb.2016.04.009
- 1200 79. Wolin, S.L. and Walter, P. (1989) Signal recognition particle mediates a transient  
1201 elongation arrest of preprolactin in reticulocyte lysate. *J Cell Biol*, **109**, 2617-2622.  
1202 10.1083/jcb.109.6.2617
- 1203 80. Flores, J.K. and Ataide, S.F. (2018) Structural Changes of RNA in Complex with  
1204 Proteins in the SRP. *Front Mol Biosci*, **5**, 7. 10.3389/fmolb.2018.00007
- 1205 81. Voorhees, R.M. and Hegde, R.S. (2015) Structures of the scanning and engaged states  
1206 of the mammalian SRP-ribosome complex. *Elife*, **4**. 10.7554/eLife.07975
- 1207 82. Collart, M.A. and Weiss, B. (2020) Ribosome pausing, a dangerous necessity for co-  
1208 translational events. *Nucleic Acids Res*, **48**, 1043-1055. 10.1093/nar/gkz763
- 1209 83. Dever, T.E., Dinman, J.D. and Green, R. (2018) Translation Elongation and Recoding  
1210 in Eukaryotes. *Cold Spring Harb Perspect Biol*, **10**. 10.1101/cshperspect.a032649
- 1211 84. Tinoco, I., Jr., Kim, H.K. and Yan, S. (2013) Frameshifting dynamics. *Biopolymers*,  
1212 **99**, 1147-1166. 10.1002/bip.22293
- 1213 85. Chong, J.L., Chuang, R.Y., Tung, L. and Chang, T.H. (2004) Ded1p, a conserved  
1214 DExD/H-box translation factor, can promote yeast L-A virus negative-strand RNA  
1215 synthesis *in vitro*. *Nucleic Acids Res*, **32**, 2031-2038. 10.1093/nar/gkh519
- 1216 86. Wickner, R.B. (1996) Double-stranded RNA viruses of *Saccharomyces cerevisiae*.  
1217 *Microbiol Rev*, **60**, 250-265.

- 1218 87. Farabaugh, P.J. (1996) Programmed translational frameshifting. *Annu Rev Genet*, **30**,  
1219 507-528. 10.1146/annurev.genet.30.1.507
- 1220 88. Itano, M.S., Arnion, H., Wolin, S.L. and Simon, S.M. (2018) Recruitment of 7SL  
1221 RNA to assembling HIV-1 virus-like particles. *Traffic*, **19**, 36-43. 10.1111/tra.12536
- 1222 89. Schmidt, M.O., Brosh, R.M., Jr. and Oliver, D.B. (2001) *Escherichia coli* SecA  
1223 helicase activity is not required *in vivo* for efficient protein translocation or  
1224 autogenous regulation. *J Biol Chem*, **276**, 37076-37085. 10.1074/jbc.M104584200
- 1225 90. Wang, S., Jomaa, A., Jaskolowski, M., Yang, C.I., Ban, N. and Shan, S.O. (2019) The  
1226 molecular mechanism of cotranslational membrane protein recognition and targeting  
1227 by SecA. *Nat Struct Mol Biol*, **26**, 919-929. 10.1038/s41594-019-0297-8
- 1228 91. Knüpfper, L., Fehrenbach, C., Denks, K., Erichsen, V., Petriman, N.A. and Koch, H.G.  
1229 (2019) Molecular Mimicry of SecA and Signal Recognition Particle Binding to the  
1230 Bacterial Ribosome. *mBio*, **10**. 10.1128/mBio.01317-19
- 1231 92. Tanner, N.K., Cordin, O., Banroques, J., Doere, M. and Linder, P. (2003) The Q  
1232 motif: a newly identified motif in DEAD box helicases may regulate ATP binding and  
1233 hydrolysis. *Mol Cell*, **11**, 127-138. 10.1016/s1097-2765(03)00006-6
- 1234 93. Lin, R.J., Newman, A.J., Cheng, S.C. and Abelson, J. (1985) Yeast mRNA splicing *in*  
1235 *vitro*. *J Biol Chem*, **260**, 14780-14792.
- 1236 94. Guthrie, C. and Fink, G.R. (eds.) (1991) *Guide to yeast genetics and molecular*  
1237 *biology*. Academic Press, San Diego.
- 1238 95. Carpousis, A.J., Khemici, V., Ait-Bara, S. and Poljak, L. (2008) Co-  
1239 immunopurification of multiprotein complexes containing RNA-degrading enzymes.  
1240 *Methods Enzymol*, **447**, 65-82. 10.1016/s0076-6879(08)02204-0

- 1241 96. Ream, J.A., Lewis, L.K. and Lewis, K.A. (2016) Rapid agarose gel electrophoretic  
1242 mobility shift assay for quantitating protein: RNA interactions. *Anal Biochem*, **511**,  
1243 36-41. [10.1016/j.ab.2016.07.027](https://doi.org/10.1016/j.ab.2016.07.027)
- 1244 97. Christiano, R., Nagaraj, N., Frohlich, F. and Walther, T.C. (2014) Global proteome  
1245 turnover analyses of the Yeasts *S. cerevisiae* and *S. pombe*. *Cell Rep*, **9**, 1959-1965.  
1246 [10.1016/j.celrep.2014.10.065](https://doi.org/10.1016/j.celrep.2014.10.065)
- 1247

1248 **Tables**

**Table 1.** Sucrose gradients fractions; nano-LC ESI MS/MS analysis<sup>a</sup>

| Protein <sup>b</sup> | Fraction(s) <sup>c</sup> | Meta Score <sup>d</sup> | #Spectres <sup>e</sup> | SC% <sup>f</sup> | RMS (ppm) <sup>g</sup> |
|----------------------|--------------------------|-------------------------|------------------------|------------------|------------------------|
| Ded1                 | 6                        | 213.4                   | 7                      | 14.2             | 6.60                   |
| Ded1                 | 7                        | 1455.7                  | 50                     | 50.8             | 8.04                   |
| SRP14                | 7                        | 80.7                    | 4                      | 13.0             | 5.25                   |
| SRP21                | 7                        | 255.5                   | 10                     | 28.7             | 7.30                   |
| SRP54                | 7                        | 229.4                   | 6                      | 8.9              | 6.40                   |
| SRP68                | 7                        | 88.2                    | 2                      | 2.2              | 8.01                   |
| ENO2                 | 6                        | 5771.5                  | 639                    | 96.6             | 5.68                   |
| ENO2                 | 7                        | 4741.5                  | 359                    | 94.7             | 6.50                   |
| SSA2                 | 6                        | 4335.6                  | 280                    | 84.4             | 10.24                  |
| SSA2                 | 7                        | 3999.2                  | 226                    | 74.5             | 8.37                   |
| FBA1                 | 6                        | 2125.7                  | 186                    | 80.5             | 6.52                   |
| FBA1                 | 7                        | 1653.2                  | 116                    | 79.7             | 6.32                   |

<sup>a</sup> Data was collected and analyzed as previously described (13). In brief, 0.5 ml fractions were collected starting from the top of the gradient and subjected to nano-liquid-chromatography electron-spray mass spectrometry analysis

<sup>b</sup> ENO2, SSA2 and FBA1 are reference proteins; they showed the strongest signals in the fraction at the top of gradient.

<sup>c</sup> Fractions correspond to those shown in Supplemental Figure S7 of Senissar *et al.* (13).

<sup>d</sup> Mascot probably-based scoring.

<sup>e</sup> Spectral counting; the same peptide is fragmented up to six times over a mean elution time of 30 seconds.

<sup>f</sup> Percentage of the protein sequence covered.

<sup>g</sup> Mean error in ppm.

1249

**Table 2.** Ded1-IgG Pull-down of sucrose gradients fractions; Nano-LC ESI MS/MS analysis<sup>a</sup>

| Protein <sup>b</sup> | Fraction(s) <sup>c</sup> | Meta Score <sup>d</sup> | #Peptides <sup>e</sup> | SC% <sup>f</sup> | RMS (ppm) <sup>g</sup> |
|----------------------|--------------------------|-------------------------|------------------------|------------------|------------------------|
| Ded1                 | 6                        | 413.4                   | 25                     | 40.6             | 3.51                   |
| Ded1                 | 7                        | 368.2                   | 8                      | 15.6             | 1.73                   |
| SRP14                | 6                        | 387.0                   | 9                      | 51.4             | 2.54                   |
| SRP14                | 7                        | 88.2                    | 2                      | 13.0             | 2.32                   |
| SRP21                | 6                        | 385.5                   | 6                      | 50.3             | 3.15                   |
| SRP21                | 7                        | 95.4                    | 2                      | 13.2             | 1.99                   |
| Sec65                | 6                        | 345.1                   | 7                      | 31.9             | 2.69                   |
| SRP68                | 6                        | 66.4                    | 1                      | 2.2              | 0.94                   |
| ENO2                 | 6, 7                     | —                       | —                      | —                | —                      |
| SSA2                 | 6                        | 395.9                   | 9                      | 21.3             | 2.83                   |
| SSA2                 | 7                        | —                       | —                      | —                | —                      |
| FBA1                 | 6, 7                     | —                       | —                      | —                | —                      |

<sup>a</sup> Data was collected and analyzed as previously described (13). Equivalent fractions as shown in Table 1 were subjected to IgG-Ded1 pull-downs with protein-A Sepharose beads and subjected to mass spectrometry analysis.

<sup>b</sup> ENO2, SSA2 and FBA1 are reference proteins; they showed the strongest signals in Table 1.

<sup>c</sup> Fractions correspond to those shown in Supplemental Figure S7 of Senissar *et al.* (13).

<sup>d</sup> Mascot probably-based scoring.

<sup>e</sup> Number of peptide fragments recovered.

<sup>f</sup> Percentage of the protein sequence covered.

<sup>g</sup> Mean error in ppm.

1250

**Table 3.** Protein characteristics<sup>a</sup>

| Protein | Gene    | Length (aa) | MW (gm/mole) | pK <sub>i</sub> | Abundance <sup>b</sup> | Half life (hr) <sup>c</sup> |
|---------|---------|-------------|--------------|-----------------|------------------------|-----------------------------|
| Ded1    | YOR204W | 604         | 65554.7      | 7.98            | 25034 ± 5043           | 9.1                         |
| SRP14   | YDL092W | 146         | 16442.1      | 10.38           | 5858 ± 1306            | 9.6                         |
| SRP21   | YKL122C | 167         | 18451.7      | 11.14           | 4248 ± 1211            | 7.9                         |
| SRP54   | YPR088C | 541         | 59630.3      | 9.04            | 8411 ± 2308            | 7.0                         |

|        |         |     |         |      |             |      |
|--------|---------|-----|---------|------|-------------|------|
| Sec65  | YML105C | 273 | 31177.3 | 9.62 | 5632 ± 2232 | 9.7  |
| SRP68  | YPL243W | 599 | 69014.7 | 9.15 | 8214 ± 1962 | 9.9  |
| SRP72  | YPL210C | 640 | 73568.8 | 10.0 | 6363 ± 1828 | 9.4  |
| SRP101 | YDR292C | 621 | 69276.8 | 7.19 | 4444 ± 2444 | 9.9  |
| SRP102 | YKL154W | 244 | 26975.3 | 8.02 | 5274 ± 1935 | 10.1 |

<sup>a</sup> Data taken from <https://www.yeastgenome.org>.

<sup>b</sup> Median abundance (molecules/cell).

<sup>c</sup> Data from (97).

1251

## 1252 **Figure Legends**

1253 **Figure 1.** Secondary structure model of yeast SCR1 of Zwieb *et al.* The model is based on  
1254 phylogenetically conserved features found in SRP RNAs and on structural probing  
1255 experiments (33,34). Yeast and other fungal SRP RNAs are unusual in that they are much  
1256 larger than in other organisms, and they lack the characteristic structure consisting of hairpins  
1257 3 and 4 of the Alu domain. Yeast has the additional hairpins 9, 10, 11 and 12 that are poorly  
1258 characterized and that have other proposed secondary structures. Conserved sequence motifs  
1259 and tertiary interactions are shown in gray.

1260 **Figure 2.** Ded1-IgG pull-downs of yeast extracts. Ded1-specific IgG (Ded1-IgG) or IgG from  
1261 pre-immune serum (Pre-IgG) were used to recover the associated factors. Input, a fraction of  
1262 the yeast extract used in the pull-down experiments was directly loaded onto the gel or RT-  
1263 PCR amplified. **(A)** Purified RNA from yeast extracts (~20% of input) or from IgG pull-  
1264 downs was reverse transcribed and PCR amplified for 25 cycles with gene-specific  
1265 oligonucleotides. The resulting products were electrophoretically separated on a 2% agarose  
1266 gel containing ethidium bromide, and the products visualized with a Gel Doc XR+ (Bio-  
1267 RAD). **(B)** Western blot analysis of HA-tagged SRP proteins. Proteins were  
1268 electrophoretically separated on a 12% SDS-PAGE, transferred to nitrocellulose membranes,  
1269 and then revealed with anti-HA IgG. Input, 40 µg (~10%) of the yeast extract was directly  
1270 loaded on the gel. Ded1-IgG, Ded1-specific IgG was used to pull-down Ded1 associated  
1271 proteins. IgG+RNase, complexes bound to Ded1-IgG-protein A beads were digested with  
1272 RNase A (1mg/ml) prior to washing and elution.

1273 **Figure 3.** Polysome sucrose gradient of cell extracts. Extracts of cell cultures individually  
1274 expressing HA-tagged proteins were treated with cycloheximide and separated on 10–50%  
1275 sucrose gradients. Note that conditions were modified from those previously used to better  
1276 separate lower molecular-weight complexes (13). (A) Trace of a representative sucrose  
1277 gradient monitored spectroscopically at 254 nm with 0.5 ml fractions collected from the top of  
1278 the gradient. (B) Extracted RNAs from different fractions were electrophoretically separated  
1279 on a 6% polyacrylamide gel containing 7 M urea and the separated RNAs were visualized  
1280 with ethidium bromide. (C) Northern blot analysis of the material separated as shown in B  
1281 and transferred to nitrocellulose membranes. The RNA was detected with a <sup>32</sup>P-labeled DNA  
1282 oligonucleotide specific for SCR1. (D) Western blot analysis of HA-tagged proteins.  
1283 Precipitated proteins from different fractions were electrophoretically separated on a 12%  
1284 SDS-PAGE, transferred to nitrocellulose membranes and probed with IgG against the HA tag  
1285 and Ded1. (E) Western blot analysis of endogenous Sec65 probed with IgG against Sec65. (F)  
1286 Western blot analysis of endogenous SRP21 probed with IgG against SRP21.

1287 **Figure 4.** Multiple-copy suppression of the *ded1-F162C* cold-sensitive phenotype. The  
1288 *ded1::HIS3* deletion strain containing the *DED1 URA* plasmid were transformed with  
1289 plasmids expressing Ded1 wildtype or Ded1-F162C mutant proteins. They were subsequently  
1290 transformed with pMW295 and pMW299 plasmids expressing the SRP components or with  
1291 the empty plasmids. Liquid cultures were then serially diluted by a factor of 10 and spotted on  
1292 synthetic defined (SD) medium plates containing 5-FOA and incubated for 3 days at 30°C and  
1293 36°C and for 5 days at 18°C

1294 **Figure 5.** Phenotypes of proteins expressed with tetracycline promoters. Liquid cultures of  
1295 the indicated strains were serially diluted by a factor of 10 and plated on YPD (yeast extract,  
1296 peptone, dextrose) rich-medium agar plates, except for *TET-SRP101* and BY4742 that were  
1297 plated on SD medium agar plates, in the presence (+DOX) or absence (-DOX) of 10 µg/ml of

1298 doxycycline. The G50 and BY4742 strains show wildtype growth. Plates were incubated for 2  
1299 days at 30°C and 36°C, and for 4 days at 18°C for the YPD plates, and for 4 days and 7 days,  
1300 respectively, for the SD plates.

1301 **Figure 6.** Ded1 multicopy suppression of SRP protein depletions. Cells of the indicated  
1302 strains with the *TET* promoter were grown in SD-LEU medium, serially diluted by a factor of  
1303 10 and spotted on SD-LEU agar plates with (+DOX) or without (-DOX) 10 µg/ml of  
1304 doxycycline. Cultures were grown 4 days at 36°C. p415, empty *LEU* plasmid; *GPD-DED1*,  
1305 Ded1 in p415 with the high expression *GPD* promoter and *CYCI* terminator; *GPD-F162C*, a  
1306 Ded1 mutant with reduced ATP binding and enzymatic activity (46). BY4742, a wildtype  
1307 yeast strain showing unimpeded growth. The phenotypes were most apparent at 36°C, but  
1308 similar effects were obtained at 30°C.

1309 **Figure 7.** Cellular location of Ded1 relative to the ER and SRP proteins. (A) Ded1-DQAD-  
1310 GFP was expressed in the *sec62* temperature-sensitive mutant with the integrated *KAR2-RFP*  
1311 plasmid and grown to an OD<sub>600</sub> of 1.0 at 24°C. (B) The same cells as in A were incubated for  
1312 15 min at the non-permissive temperature of 37°C prior to visualization. The arrowheads  
1313 indicate positions where chains of Ded1-DQAD-GFP foci co-localized or co-associated with  
1314 Kar2-RFP. (C) SRP14-GFP expressed from the chromosome and Ded1-DQAD-mCh  
1315 expressed off the p415 plasmid were grown to an OD<sub>600</sub> of 0.95 at 30°C. (D) SRP-GFP was  
1316 overexpressed off the p413-PL plasmid and Ded1-DQAD-mCh was overexpressed off the  
1317 p416-PL plasmid until an OD<sub>600</sub> of 0.4 at 30°C in the *xpoI-T539C* yeast strain. Cells in the  
1318 insert were treated with 10 µg/µl (~200 nM) of leptomycin b for 1 h.

1319 **Figure 8.** Over-expressed SRP14 and SRP21 accumulate in the nucleus. (A) SRP14-GFP was  
1320 expressed off the p413 plasmid and Ded1-DQAD-mCh was expressed off the p416 plasmid in  
1321 the *xpoI-T539C* yeast strain (70) and grown to an OD<sub>600</sub> of 0.45 at 30°C. (B) The same as in



1322 **A** except that the cells were incubated for 60 min in the presence of 10  $\mu\text{g}/\text{ml}$  of leptomycin b.  
1323 **(C)** Same as A but with cells expressing SRP21-GFP. **(D)** Same as C but with cells incubated  
1324 for 60 min with leptomycin b.

1325 **Figure 9.** Ded1 physically interacted with the SRP proteins in the absence of RNA. **(A)** 4  $\mu\text{g}$   
1326 of Ded1 was incubated with 4  $\mu\text{g}$  of each SRP protein. The material was incubated 45 min at  
1327 30°C, immunoprecipitated with protein-A-Sepharose beads with Ded1-specific IgG, separated  
1328 on a 12% SDS PAGE and visualized with coomassie blue. SRP68 and SRP72 migrated close  
1329 to Ded1 and consequently were not unambiguously separated. **(B)** The same as A except 6  $\mu\text{g}$   
1330 of the SRP proteins was used with 4  $\mu\text{g}$  of Ded1. Proteins were recovered with Ded1- or  
1331 SRP21-specific IgG as indicated.

1332 **Figure 10.** The SRP proteins inhibited the ATPase activity of Ded1. **(A)** Reactions were  
1333 undertaken with 7 nM Ded1, 200 nM of the SRP proteins, 1 mM ATP and 23 nM of SCR1 or  
1334 actin RNA. The reaction velocities were measured over 40 min at 30°C. **(B)** Reaction were  
1335 done as in A but with 23 nM of the SRP proteins except SRP14, which was used at 46 nM to  
1336 form the homodimer, and 23 nM RNAs. The reaction velocities were normalized relative to  
1337 the activity of Ded1 in the presence of the RNA (SCR1 or actin) alone. +SRP-All, Ded1 was  
1338 incubated with SRP14, SRP21, SRP54, Sec65, SRP68, and SRP72; Ded1-GAT, a Ded1 P-  
1339 loop mutant that lacks ATPase activity; +no RNA, Ded1 was incubated in the absence of an  
1340 RNA substrate with the SRP proteins. The mean and standard deviations are shown for two  
1341 independent experiments in panel A and for three in panel B. The lower error bars were  
1342 deleted for clarity.

1343 **Figure 11.** The RNA-dependent effects of SRP21 on the ATPase activity of Ded1. **(A)** Ded1  
1344 was pre-incubated with the RNAs at 30°C for 30 min. SRP21 or SRP21 $\Delta$ 73 were then added  
1345 at 200 nM with 1 mM ATP, and the ATPase velocity was measured over 40 min. The mean

1346 and standard deviations are shown for two independent experiments. **(B)** Ded1 at 7 nM was  
1347 incubated with 23 nM SCR1, 23 nM actin or 0.14  $\mu\text{g}/\mu\text{l}$  yeast RNA and with 1 mM ATP.  
1348 SRP21 was used at 23 nM and SRP14 at 46 nM (to form homodimer). The reaction velocities  
1349 were measured over 40 min at 30°C. The mean and standard deviations are shown for three  
1350 independent measurements are shown for SCR1 and actin and for two independent  
1351 measurements for yeast RNA. **(C)** Reactions were done as in B. Ded1 at 7 nM was incubated  
1352 with 23 nM SCR1 (equivalent to 0.0039  $\mu\text{g}/\mu\text{l}$ ) or with 0.12  $\mu\text{g}/\mu\text{l}$  of tRNA or poly(A). The  
1353 SRP21 was used at 200 nM. The mean and standard deviations are shown for three  
1354 independent measurements. The lower error bars were deleted for clarity.

1355 **Figure 12.** RNA binding assays of Ded1 and SRP21. **(A)** Ded1 binds SCR1 and actin with  
1356 similar affinities. The indicated quantities of the Ded1 protein was incubated with 0.15  $\mu\text{M}$  of  
1357 the indicated RNAs and then separated on a 1% agarose gel in the presence of ethidium  
1358 bromide. Ori, loading well of agarose gel. **(B)** The indicated quantities of the SRP21 proteins  
1359 were incubated with 50 nM of the indicated RNAs and separated on a 1% agarose gel. **(C)**  
1360 SRP21 deleted for the 73 carboxyl-terminal residues that are not structurally conserved in  
1361 mammalian SRP9.

1362 **Figure 13.** Electrophoretic mobility shift assays of Ded1 with SCR1 (522 nts) and actin (605  
1363 nts) RNAs. Proteins were incubated with the RNA and separated under nondenaturing  
1364 conditions on 1% agarose gels containing ethidium bromide. The markers indicate the  
1365 positions of the major bands of the GeneRuler DNA ladder (Thermo Scientific). Ori, loading  
1366 well of agarose gel. **(A)** Ded1 (0.8  $\mu\text{M}$ ) and SRP21 (0.8  $\mu\text{M}$ ) were incubated with 0.15  $\mu\text{M}$  of  
1367 either SCR1 or actin RNA in the presence or absence of 5 mM ATP or AMP-PNP (PNP). **(B)**  
1368 Increasing concentrations (in  $\mu\text{M}$ ) of Ded1 or an 78 amino-acid, carboxyl-terminal deletion of  
1369 Ded1 [Ded1 $\Delta\text{C}$ ; (54)] was incubated with 0.15  $\mu\text{M}$  SCR1 RNA and 5 mM AMP-PNP. **(C)**

1370 Increasing concentrations of Ded1 was incubated with 0.15  $\mu$ M SCR1 RNA, 0.80  $\mu$ M SRP21  
1371 and 5 mM AMP-PNP.

1372 **Figure 14.** Ded1 and SRP21 bind various regions of SCR1. The indicated quantities of  
1373 protein were incubated with the indicated RNAs and separated on a 1% agarose gel in the  
1374 presence of ethidium bromide. (A) The indicated concentrations of Ded1 (in  $\mu$ M) were added  
1375 to 0.15  $\mu$ M of the different SCR1 RNAs in the presence of 5 mM AMP-PNP. (B) The  
1376 indicated concentrations of SRP21 (in  $\mu$ M) were added to 0.15  $\mu$ M of the different SCR1  
1377 RNAs. Ori, loading well of agarose gel.

1378 **Figure 15.** Model for the role of Ded1 in SRP-dependent translation. (A) Ded1 (shown in  
1379 green) associates with the mRNA during translation initiation and remains attached to the  
1380 mRNA in front of the ribosomes. It consists of RecA-like domains 1 (d1) and 2 (d2), an  
1381 amino-terminal domain (N) and a carboxyl-terminal domain (C). The RNA-dependent  
1382 ATPase activity of Ded1 is unaltered, and it is often in the "open" conformation with weak  
1383 affinity for the RNA; it is able to translocate with the ribosomes during translation. (B) The  
1384 SRP (shown in blue) associates with ribosomes translating mRNAs (or undergoes  
1385 conformational changes in the case of pre-bound SRP) when the signal peptide leaves the exit  
1386 channel and obtains a certain length. Ded1 may help in assembling and stabilizing the  
1387 complex. Conformational changes of the SRP causes SRP14 to block the entry channel and  
1388 prevent the eEF2 elongation factor (EF) from binding the ribosomes, which pauses  
1389 elongation. Ded1 may bind part of the Alu domain of SCR1, shown in magenta, during these  
1390 conformational changes to promote SRP14 binding to the ribosomes. At the same time,  
1391 SRP21 inhibits the ATPase activity of Ded1, which forms the "closed" conformation with  
1392 high affinity for the RNA. This ATP-bound form of Ded1 kinks the RNA (red triangle) on  
1393 domain 1 and locks Ded1 on the RNA. This prevents the ribosomes from frame shifting  
1394 (sliding) on the RNA and perhaps stabilizes the ribosome-mRNA complex to prevent

1395 premature termination of translation. **(C)** The paused mRNA-ribosome complex associates  
1396 with SRP receptor (SR) factors SRP101 and subsequently SRP102, which brings the mRNA-  
1397 ribosome complex to the Sec61 ER translocon. **(D)** The SRP complex dissociates from the  
1398 ribosomes, the ATPase activity of Ded1 is restored and translation continues. Note that this  
1399 model also applies to the SRP-dependent import of polypeptides with internal transmembrane  
1400 domains, and it does not preclude the possibility that multiple Ded1 molecules are involved,  
1401 that the SRP associates multiple times with the ribosomes during elongation or that the SRP-  
1402 associated ribosomes remain on the ER over multiple rounds of translation.

1403 **Supplementary Files:**

1404 **Supplementary Table 1.** Oligonucleotides used in this study

1405 **Supplementary Table 2.** Constructs used in this study

1406 **Supplementary Table 3.** Yeast and bacterial strains used in this study

1407 **Supplementary Figure 1.** Purified His-tagged recombinant proteins.

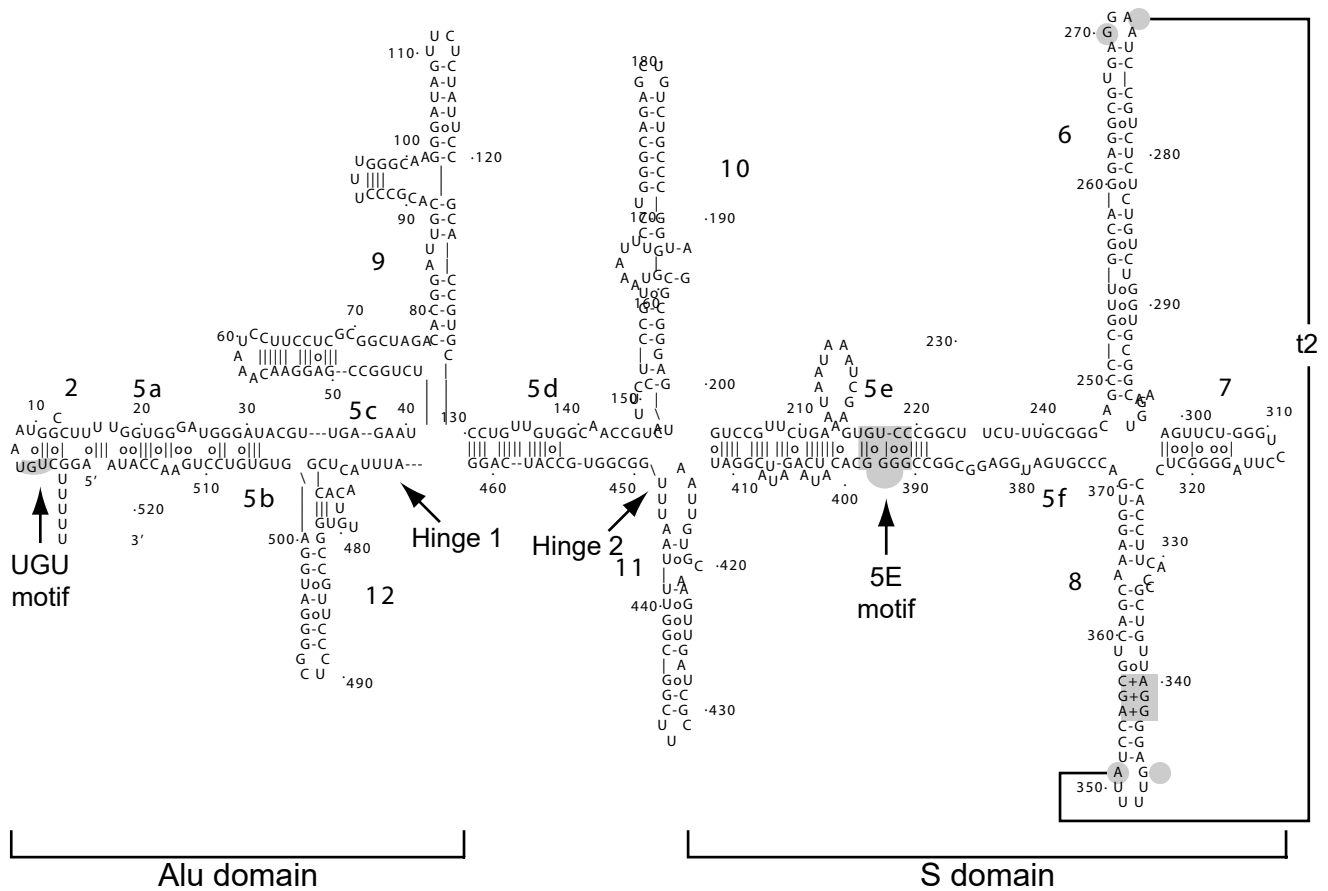

**Figure 1.** Secondary structure model of yeast SCR1 of Zwieb et al. The model is based on phylogenetically conserved features found in SRP RNAs and on structural probing experiments (33,34). Yeast and other fungal SRP RNAs are unusual in that they are much larger than in other organisms, and they lack the characteristic structure consisting of hairpins 3 and 4 of the Alu domain. Yeast has the additional hairpins 9, 10, 11 and 12 that are poorly characterized and that have other proposed secondary structures. Conserved sequence motifs and tertiary interactions are shown in gray.

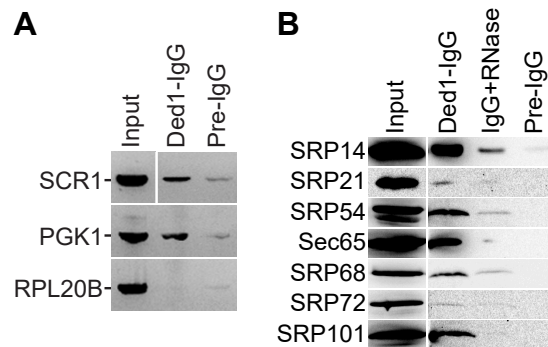

**Figure 2.** Ded1-IgG pull-downs of yeast extracts. Ded1-specific IgG (Ded1-IgG) or IgG from pre-immune serum (Pre-IgG) were used to recover the associated factors. Input, a fraction of the yeast extract used in the pull-down experiments was directly loaded onto the gel or RT-PCR amplified. **(A)** Purified RNA from yeast extracts (~20% of input) or from IgG pull-downs was reverse transcribed and PCR amplified for 25 cycles with gene-specific oligonucleotides. The resulting products were electrophoretically separated on a 2% agarose gel containing ethidium bromide, and the products visualized with a Gel Doc XR+ (Bio-RAD). **(B)** Western blot analysis of HA-tagged SRP proteins. Proteins were electrophoretically separated on a 12% SDS-PAGE, transferred to nitrocellulose membranes, and then revealed with anti-HA IgG. Input, 40  $\mu$ g (~10%) of the yeast extract was directly loaded on the gel. Ded1-IgG, Ded1-specific IgG was used to pull-down Ded1 associated proteins. IgG+RNase, complexes bound to Ded1-IgG-protein A beads were digested with RNase A (1mg/ml) prior to washing and elution.

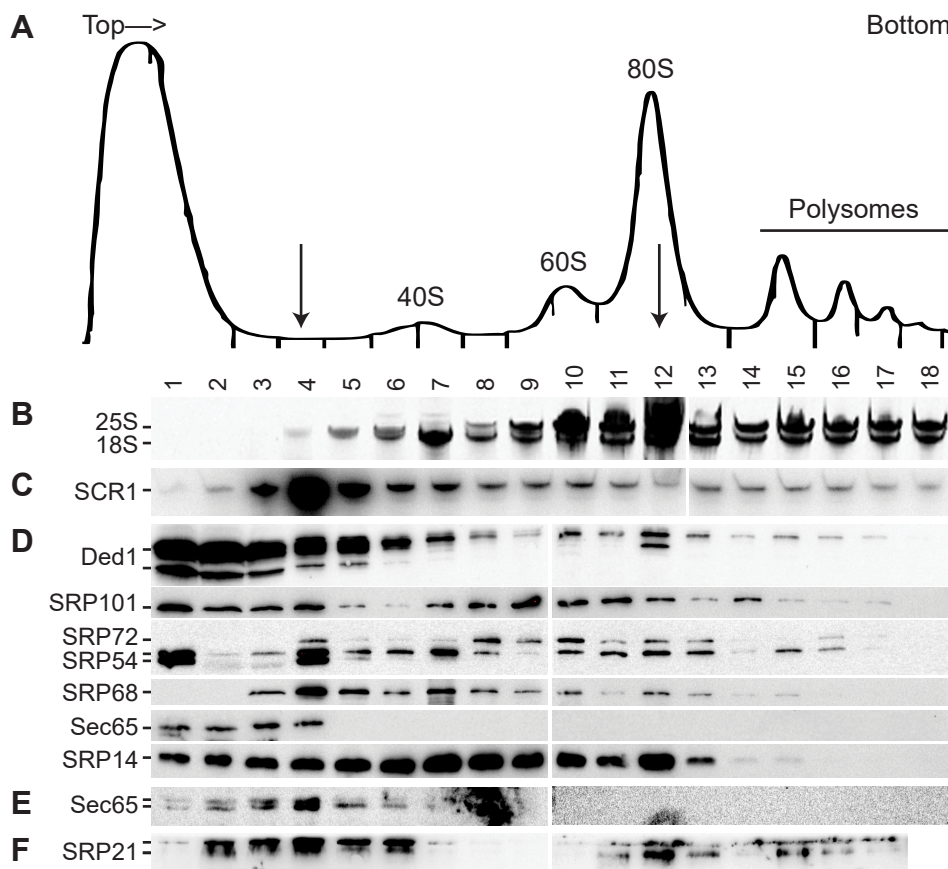

**Figure 3.** Polysome sucrose gradient of cell extracts. Extracts of cell cultures individually expressing HA-tagged proteins were treated with cycloheximide and separated on 10–50% sucrose gradients. Note that conditions were modified from those previously used to better separate lower molecular-weight complexes (13). (A) Trace of a representative sucrose gradient monitored spectroscopically at 254 nm with 0.5 ml fractions collected from the top of the gradient. (B) Extracted RNAs from different fractions were electrophoretically separated on a 6% polyacrylamide gel containing 7 M urea and the separated RNAs were visualized with ethidium bromide. (C) Northern blot analysis of the material separated as shown in B and transferred to nitrocellulose membranes. The RNA was detected with a  $^{32}\text{P}$ -labeled DNA oligonucleotide specific for SCR1. (D) Western blot analysis of HA-tagged proteins. Precipitated proteins from different fractions were electrophoretically separated on a 12% SDS-PAGE, transferred to nitrocellulose membranes and probed with IgG against the HA tag and Ded1. (E) Western blot analysis of endogenous Sec65 probed with IgG against Sec65. (F) Western blot analysis of endogenous SRP21 probed with IgG against SRP21.

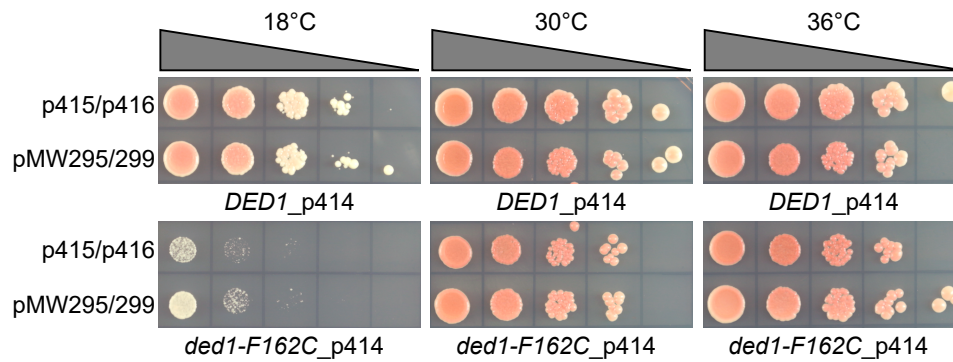

**Figure 4.** Multiple-copy suppression of the *ded1-F162C* cold-sensitive phenotype. The *ded1::HIS3* deletion strain containing the *DED1 URA* plasmid were transformed with plasmids expressing Ded1 wildtype or Ded1-F162C mutant proteins. They were subsequently transformed with pMW295 and pMW299 plasmids expressing the SRP components or with the empty plasmids. Liquid cultures were then serially diluted by a factor of 10 and spotted on synthetic defined (SD) medium plates containing 5-FOA and incubated for 3 days at 30°C and 36°C and for 5 days at 18°C



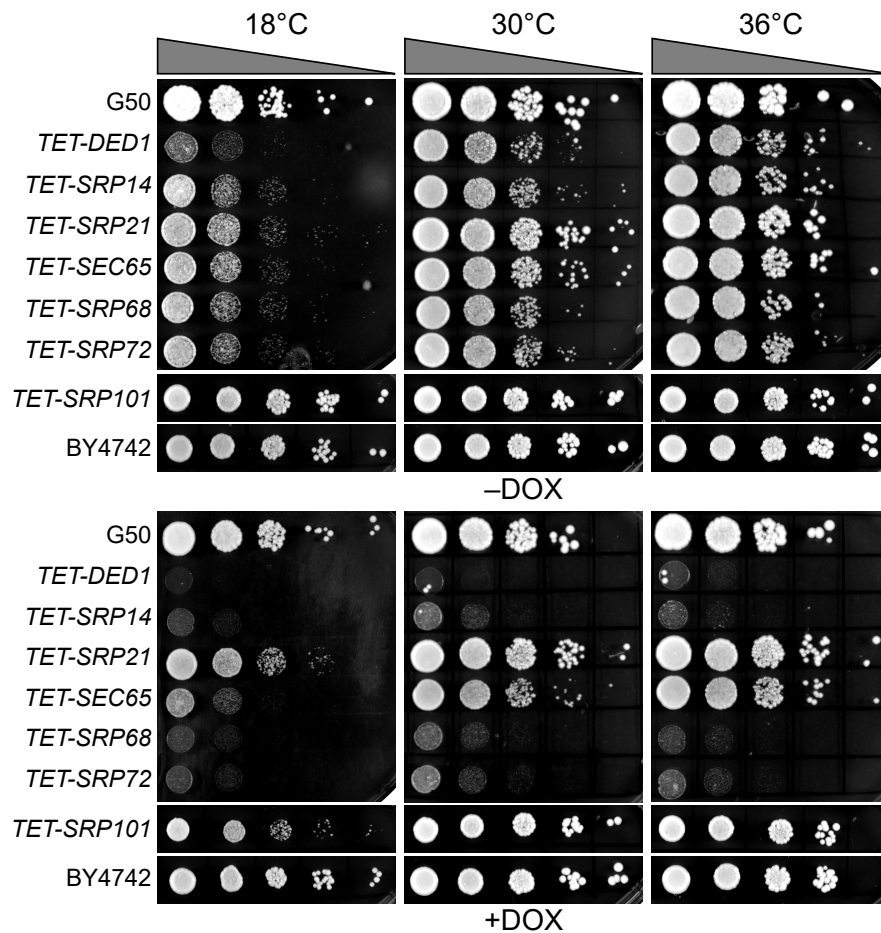

**Figure 5.** Phenotypes of proteins expressed with tetracycline promoters. Liquid cultures of the indicated strains were serially diluted by a factor of 10 and plated on YPD (yeast extract, peptone, dextrose) rich-medium agar plates, except for *TET-SRP101* and BY4742 that were plated on SD medium agar plates, in the presence (+DOX) or absence (-DOX) of 10  $\mu\text{g/ml}$  of doxycycline. The G50 and BY4742 strains show wildtype growth. Plates were incubated for 2 days at 30°C and 36°C, and for 4 days at 18°C for the YPD plates, and for 4 days and 7 days, respectively, for the SD plates.

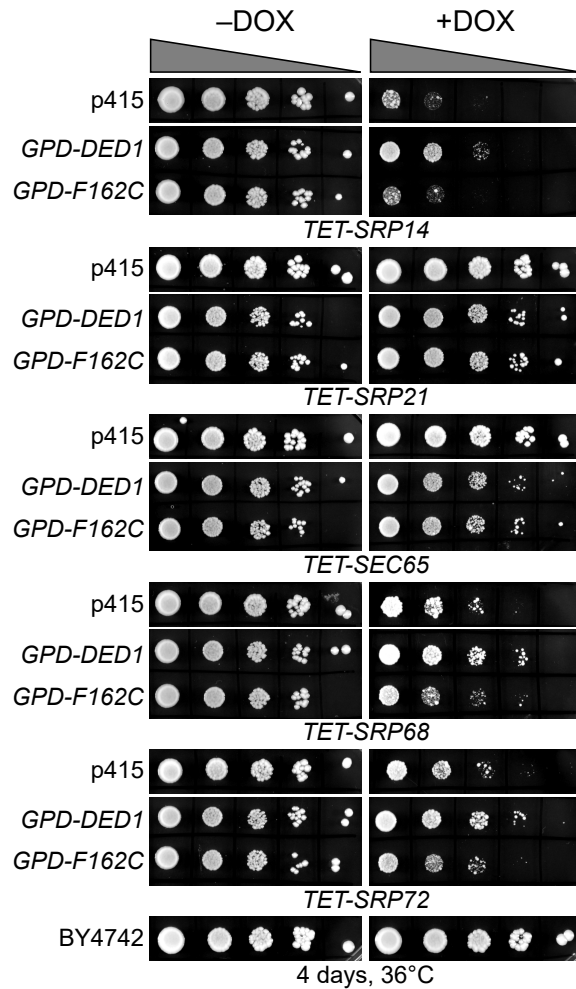

**Figure 6.** Ded1 multicopy suppression of SRP protein depletions. Cells of the indicated strains with the *TET* promoter were grown in SD-LEU medium, serially diluted by a factor of 10 and spotted on SD-LEU agar plates with (+DOX) or without (-DOX) 10 µg/ml of doxycycline. Cultures were grown 4 days at 36°C. p415, empty *LEU* plasmid; *GPD-DED1*, Ded1 in p415 with the high expression *GPD* promoter and *CYC1* terminator; *GPD-F162C*, a Ded1 mutant with reduced ATP binding and enzymatic activity (46). BY4742, a wildtype yeast strain showing unimpeded growth. The phenotypes were most apparent at 36°C, but similar effects were obtained at 30°C.

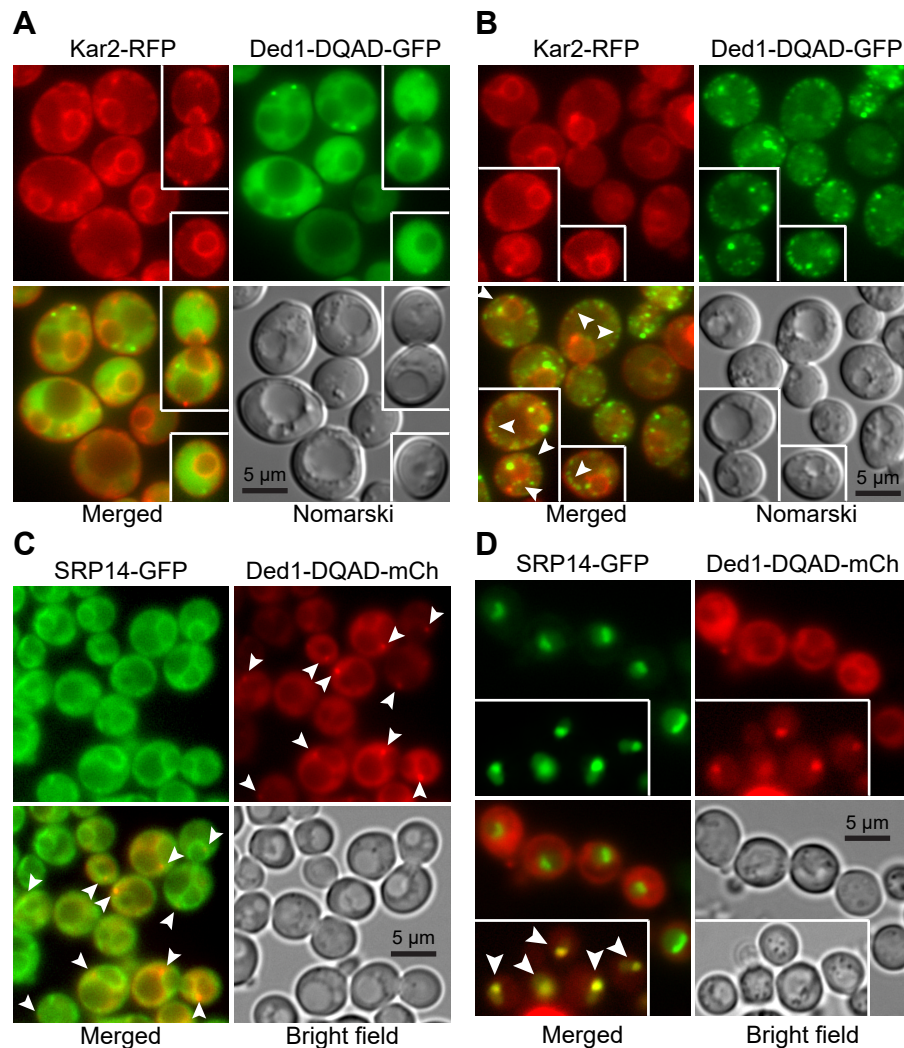

**Figure 7.** Cellular location of Ded1 relative to the ER and SRP proteins. **(A)** Ded1-DQAD-GFP was expressed in the *sec62* temperature-sensitive mutant with the integrated *KAR2-RFP* plasmid and grown to an OD600 of 1.0 at 24°C. **(B)** The same cells as in A were incubated for 15 min at the non-permissive temperature of 37°C prior to visualization. The arrowheads indicate positions where chains of Ded1-DQAD-GFP foci co-localized or co-associated with Kar2-RFP. **(C)** SRP14-GFP expressed from the chromosome and Ded1-DQAD-mCh expressed off the p415 plasmid were grown to an OD600 of 0.95 at 30°C. **(D)** SRP14-GFP was overexpressed off the p413-PL plasmid and Ded1-DQAD-mCh was overexpressed off the p416-PL plasmid until an OD600 of 0.4 at 30°C in the *xpoI-T539C* yeast strain. Cells in the insert were treated with 10 µg/µl (~200 nM) of leptomycin b for 1 h.

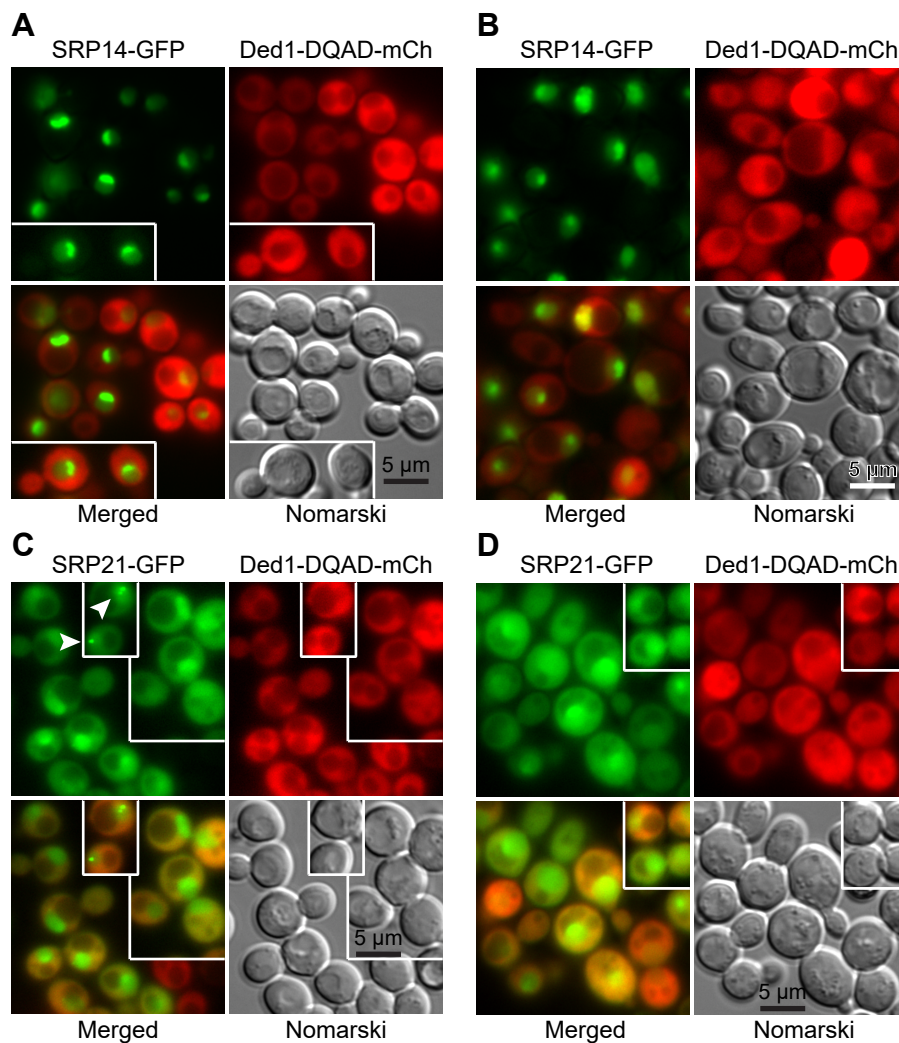

**Figure 8.** Over-expressed SRP14 and SRP21 accumulate in the nucleus. **(A)** SRP14-GFP was expressed off the p413 plasmid and Ded1-DQAD-mCh was expressed off the p416 plasmid in the *xpoI-T539C* yeast strain (70) and grown to an OD600 of 0.45 at 30°C. **(B)** The same as in A except that the cells were incubated for 60 min in the presence of 10 μg/ml of leptomycin b. **(C)** Same as A but with cells expressing SRP21-GFP. **(D)** Same as C but with cells incubated for 60 min with leptomycin b.

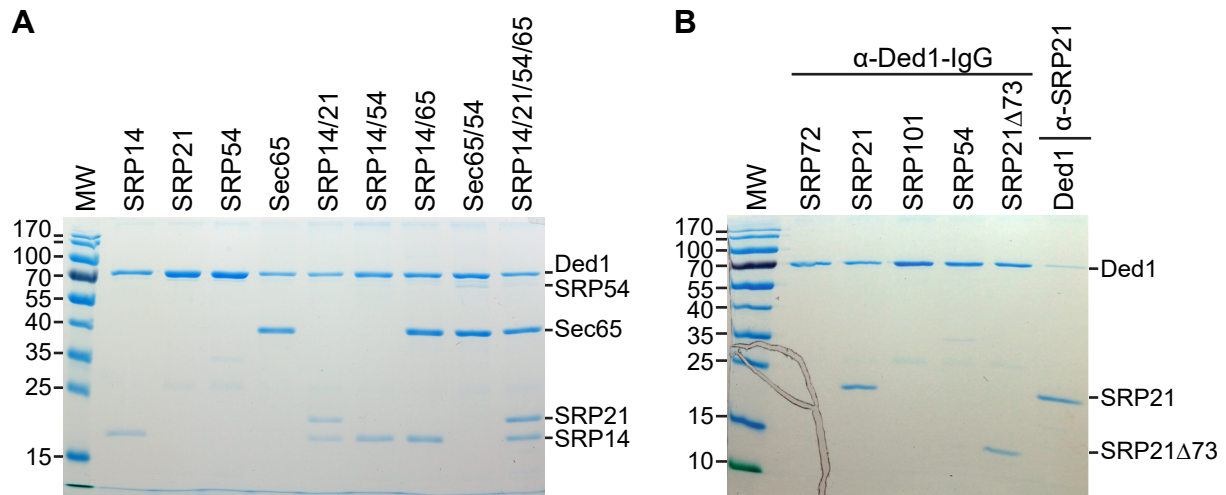

**Figure 9.** Ded1 physically interacted with the SRP proteins in the absence of RNA. **(A)** 4  $\mu$ g of Ded1 was incubated with 4  $\mu$ g of each SRP protein. The material was incubated 45 min at 30°C, immunoprecipitated with protein-A-Sepharose beads with Ded1-specific IgG, separated on a 12% SDS PAGE and visualized with coomassie blue. SRP68 and SRP72 migrated close to Ded1 and consequently were not unambiguously separated. **(B)** The same as A except 6  $\mu$ g of the SRP proteins was used with 4  $\mu$ g of Ded1. Proteins were recovered with Ded1- or SRP21-specific IgG as indicated.

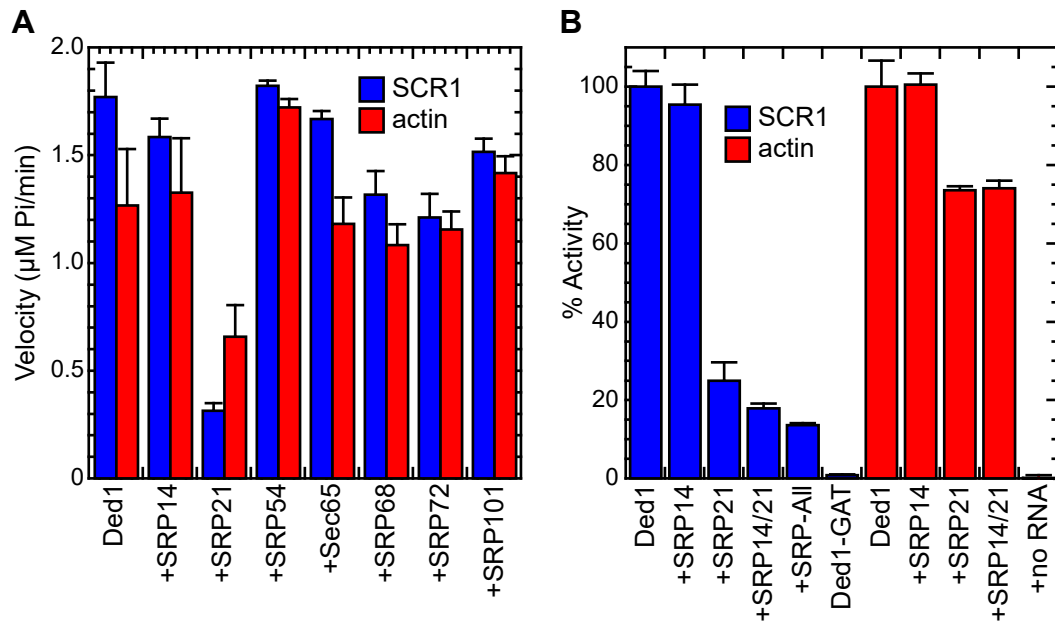

**Figure 10.** The SRP proteins inhibited the ATPase activity of Ded1. **(A)** Reactions were undertaken with 7 nM Ded1, 200 nM of the SRP proteins, 1 mM ATP and 23 nM of SCR1 or actin RNA. The reaction velocities were measured over 40 min at 30°C. **(B)** Reaction were done as in A but with 23 nM of the SRP proteins except SRP14, which was used at 46 nM to form the homodimer, and 23 nM RNAs. The reaction velocities were normalized relative to the activity of Ded1 in the presence of the RNA (SCR1 or actin) alone. +SRP-All, Ded1 was incubated with SRP14, SRP21, SRP54, Sec65, SRP68, and SRP72; Ded1-GAT, a Ded1 P-loop mutant that lacks ATPase activity; +no RNA, Ded1 was incubated in the absence of an RNA substrate with the SRP proteins. The mean and standard deviations are shown for two independent experiments in panel A and for three in panel B. The lower error bars were deleted for clarity.

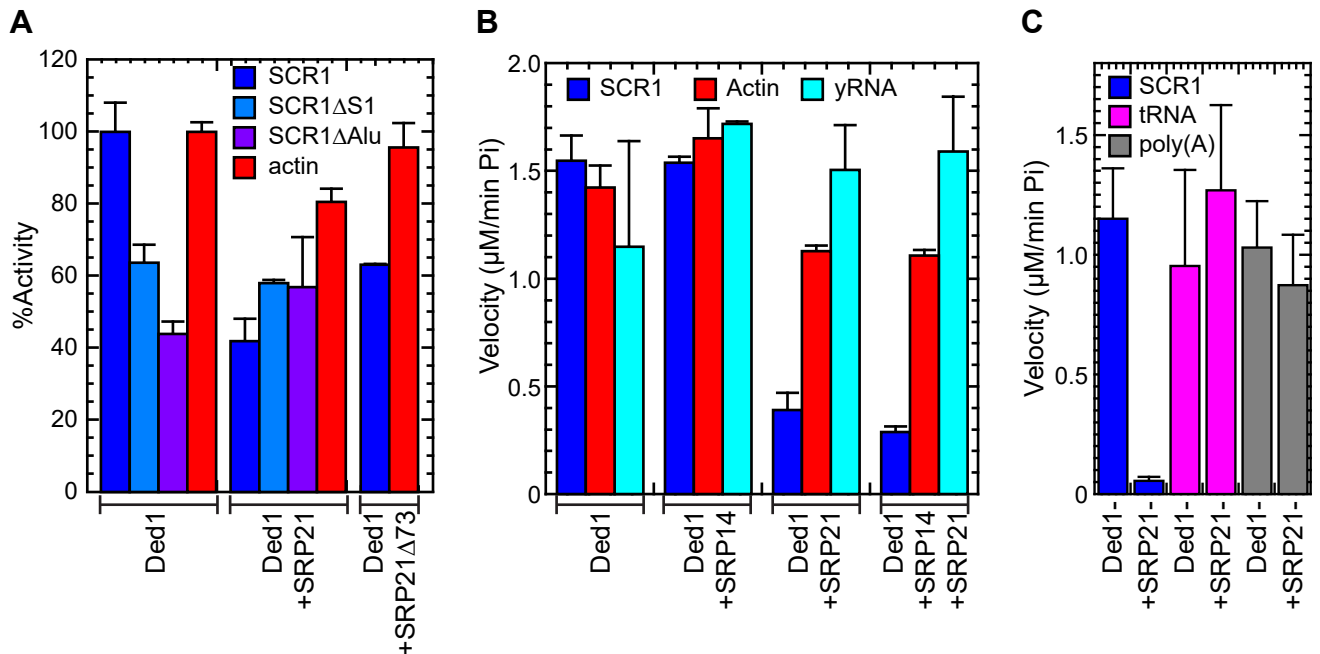

**Figure 11.** The RNA-dependent effects of SRP21 on the ATPase activity of Ded1. (A) Ded1 was pre-incubated with the RNAs at 30°C for 30 min. SRP21 or SRP21 $\Delta$ 73 were then added at 200 nM with 1 mM ATP, and the ATPase velocity was measured over 40 min. The mean and standard deviations are shown for two independent experiments. (B) Ded1 at 7 nM was incubated with 23 nM SCR1, 23 nM actin or 0.14  $\mu$ g/ $\mu$ l yeast RNA and with 1 mM ATP. SRP21 was used at 23 nM and SRP14 at 46 nM (to form homodimer). The reaction velocities were measured over 40 min at 30°C. The mean and standard deviations are shown for three independent measurements are shown for SCR1 and actin and for two independent measurements for yeast RNA. (C) Reactions were done as in B. Ded1 at 7 nM was incubated with 23 nM SCR1 (equivalent to 0.0039  $\mu$ g/ $\mu$ l) or with 0.12  $\mu$ g/ $\mu$ l of tRNA or poly(A). The SRP21 was used at 200 nM. The mean and standard deviations are shown for three independent measurements. The lower error bars were deleted for clarity.

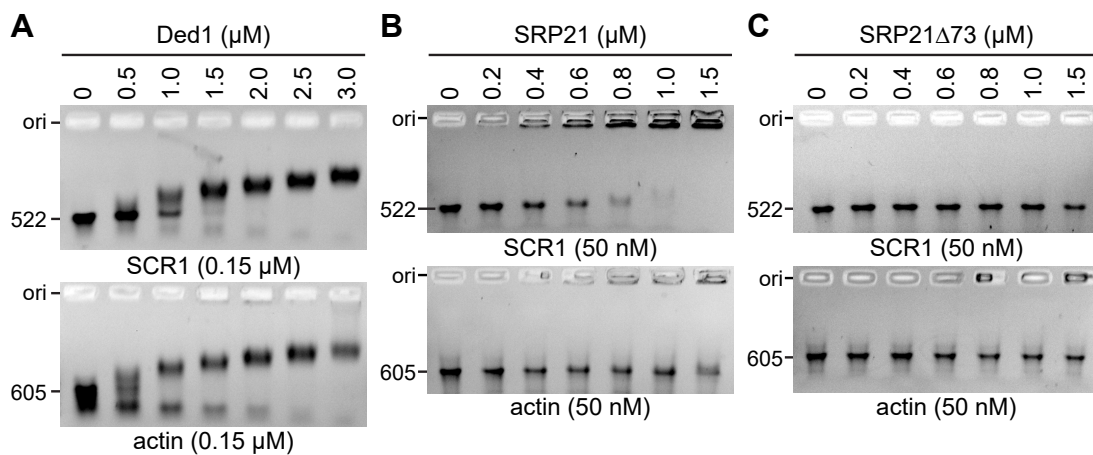

**Figure 12.** RNA binding assays of Ded1 and SRP21. (A) Ded1 binds SCR1 and actin with similar affinities. The indicated quantities of the Ded1 protein was incubated with 0.15  $\mu\text{M}$  of the indicated RNAs and then separated on a 1% agarose gel in the presence of ethidium bromide. Ori, loading well of agarose gel. (B) The indicated quantities of the SRP21 proteins were incubated with 50 nM of the indicated RNAs and separated on a 1% agarose gel. (C) SRP21 deleted for the 73 carboxyl-terminal residues that are not structurally conserved in mammalian SRP9.



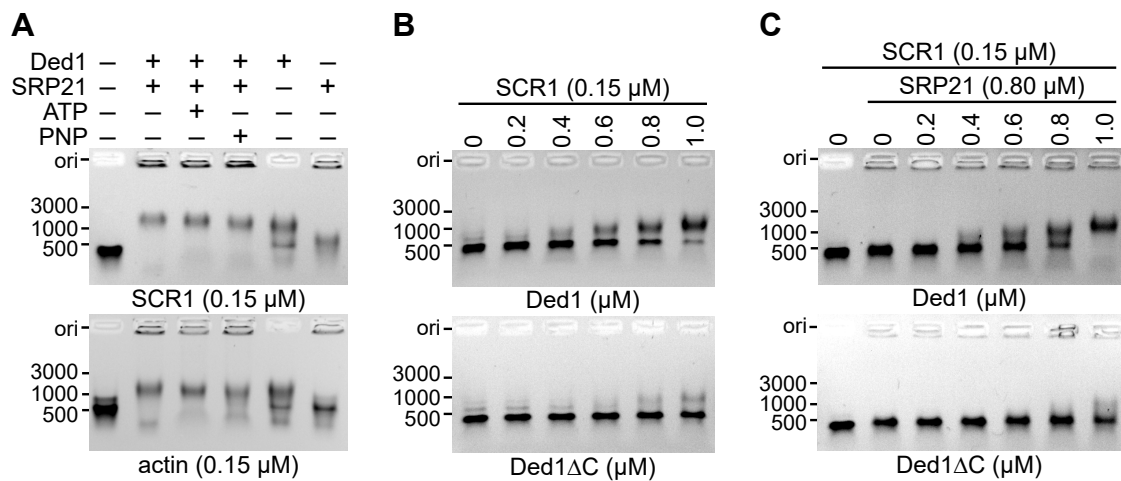

**Figure 13.** Electrophoretic mobility shift assays of Ded1 with SCR1 (522 nts) and actin (605 nts) RNAs. Proteins were incubated with the RNA and separated under nondenaturing conditions on 1% agarose gels containing ethidium bromide. The markers indicate the positions of the major bands of the GeneRuler DNA ladder (Thermo Scientific). Ori, loading well of agarose gel. **(A)** Ded1 (0.8  $\mu$ M) and SRP21 (0.8  $\mu$ M) were incubated with 0.15  $\mu$ M of either SCR1 or actin RNA in the presence or absence of 5 mM ATP or AMP-PNP (PNP). **(B)** Increasing concentrations (in  $\mu$ M) of Ded1 or an 78 amino-acid, carboxyl-terminal deletion of Ded1 [Ded1 $\Delta$ C; (54)] was incubated with 0.15  $\mu$ M SCR1 RNA and 5 mM AMP-PNP. **(C)** Increasing concentrations of Ded1 was incubated with 0.15  $\mu$ M SCR1 RNA, 0.80  $\mu$ M SRP21 and 5 mM AMP-PNP.

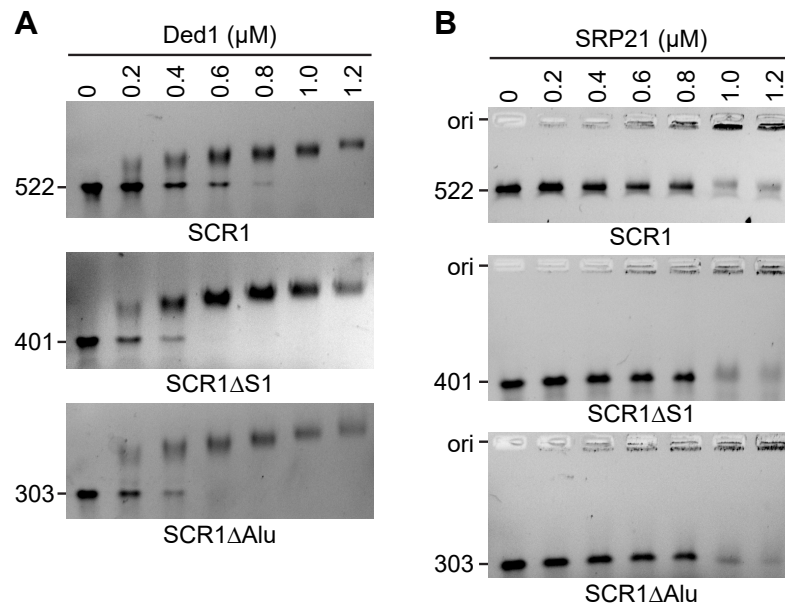

**Figure 14.** Ded1 and SRP21 bind various regions of SCR1. The indicated quantities of protein were incubated with the indicated RNAs and separated on a 1% agarose gel in the presence of ethidium bromide. **(A)** The indicated concentrations of Ded1 (in  $\mu$ M) were added to 0.15  $\mu$ M of the different SCR1 RNAs in the presence of 5 mM AMP-PNP. **(B)** The indicated concentrations of SRP21 (in  $\mu$ M) were added to 0.15  $\mu$ M of the different SCR1 RNAs. Ori, loading well of agarose gel.

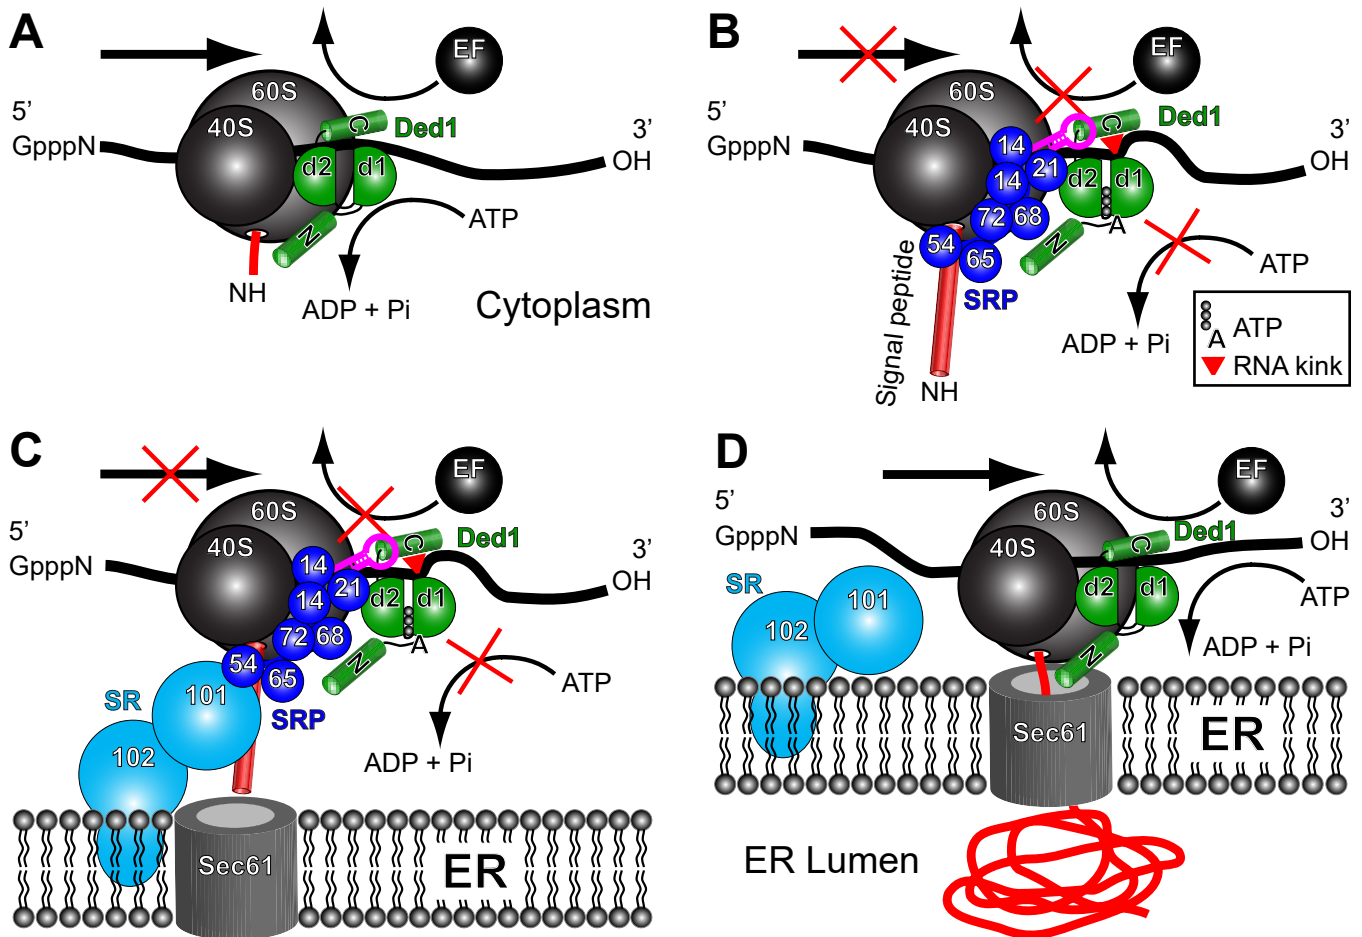

**Figure 15.** Model for the role of Ded1 in SRP-dependent translation. (A) Ded1 (shown in green) associates with the mRNA during translation initiation and remains attached to the mRNA in front of the ribosomes. It consists of RecA-like domains 1 (d1) and 2 (d2), an amino-terminal domain (N) and a carboxyl-terminal domain (C). The RNA-dependent ATPase activity of Ded1 is unaltered, and it is often in the "open" conformation with weak affinity for the RNA; it is able to translocate with the ribosomes during translation. (B) The SRP (shown in blue) associates with ribosomes translating mRNAs (or undergoes conformational changes in the case of pre-bound SRP) when the signal peptide leaves the exit channel and obtains a certain length. Ded1 may help in assembling and stabilizing the complex. Conformational changes of the SRP causes SRP14 to block the entry channel and prevent the eEF2 elongation factor (EF) from binding the ribosomes, which pauses elongation. Ded1 may bind part of the Alu domain of SCR1, shown in magenta, during these conformational changes to promote SRP14 binding to the ribosomes. At the same time, SRP21 inhibits the ATPase activity of Ded1, which forms the "closed" conformation with high affinity for the RNA. This ATP-bound form of Ded1 kinks the RNA (red triangle) on domain 1 and locks Ded1 on the RNA. This prevents the ribosomes from frame shifting (sliding) on the RNA and perhaps stabilizes the ribosome-mRNA complex to prevent premature termination of translation. (C) The paused mRNA-ribosome complex associates with SRP receptor (SR) factors SRP101 and subsequently SRP102, which brings the mRNA-ribosome complex to the Sec61 ER translocon. (D) The SRP complex dissociates from the ribosomes, the ATPase activity of Ded1 is restored and translation continues. Note that this model also applies to the SRP-dependent import of polypeptides with internal transmembrane domains, and it does not preclude the possibility that multiple Ded1 molecules are involved, that the SRP associates multiple times with the ribosomes during elongation or that the SRP-associated ribosomes remain on the ER over multiple rounds of translation.

The DEAD-box RNA helicase Ded1 from yeast is associated with the signal recognition particle (SRP), and its enzymatic activity is regulated by SRP21.

Hilal Yeter-Alat<sup>1,2</sup>, Naïma Belgareh-Touzé<sup>3</sup>, Emmeline Huvelle<sup>1,2</sup>, Molka Mokdadi<sup>1,2,4,5</sup>, Josette Banroques<sup>1,2</sup>, and N. Kyle Tanner<sup>1,2\*</sup>

**Supplementary Table 1.** Oligonucleotides used in this study

| Name                 | Name oligo      | Location | 5'—3' sequence <sup>a</sup>                                                         |
|----------------------|-----------------|----------|-------------------------------------------------------------------------------------|
| SCR1<br>RNA          | SCR1_up2        | M1       | GCC TAT <b>GGA TCC</b> TAA TAC GAC TCA CTA TAG<br>GGC TGT <b>AAT GGC TTT CTG GT</b> |
|                      | SCR1_low        | L26      | GCC TAT <b>CTC GAG TTT AAA</b> AAT ATG GTT CAG<br>GAC ACA CT                        |
| SCR1ΔAlu<br>RNA      | SCR1dAlu_up     | M36      | GCC TAT <b>GGA TCC</b> TAA TAC GAC TCA CTA TAG<br>GGT CGT AAA TTT GTC CTG GGC A     |
|                      | SCR1dAlu_low    | M35      | GCC TAT <b>AAG CTT TTT AAA</b> ACC GCC AAA TTA<br>AAC CGC                           |
| SCR1ΔS1<br>RNA       | pUC18_5'        | M29      | CCG TAT TAC CGC CTT TGA GTG<br>CGC CTC CAT CAC GGG CGAA CCC GCA AAG ATC             |
|                      | SCR1dS1_low     | M31      | GAT TTA TTA TAG C                                                                   |
|                      | pUC18_3'        | M30      | GGT GTG AAA TAC CGC ACA GA<br>ATC GAT CTT TGC GGG TTCG CCC GTG ATG GAG              |
| SCR1dS1_up           | M32             | GCG G    |                                                                                     |
| SCR1<br>(northern)   | SCR1_Northern   | L24      | ATA AAA CTC CCC TAA CAG CGG TGA                                                     |
| PGK1<br>(northern)   | PGK1_357        | L67      | TCT TCG ATG TGG TAA CGC AAG TTT                                                     |
| RPL20B<br>(northern) | RPL20B_Northern | M2       | CAG TAA CGA GAC TTG GCG ATG AC                                                      |
| SCR1<br>(RT-PCR)     | SCR1_fwd        | M5       | CAA ATC CTT CCT CGC GGC TA                                                          |
| PGK1<br>(RT-PCR)     | SCR1_rev        | M6       | CGC CAA ATT AAA CCG CCG AA                                                          |
| RPL20B<br>(RT-PCR)   | PGK1_fwd        | M9       | TTG GAA AAC TTG CGT TAC CAC                                                         |
|                      | PGK1_rev        | M10      | CTG GCA AGA CGA CTT CGA CA                                                          |
|                      | RPL20B_fwd      | M13      | TTA CCA ACT GAA TCC GTT CCA                                                         |
|                      | RPL20B_         | M14      | GGT CTC TTG TAA GAG AAA GTC T                                                       |
| SRP14                | SRP14_up        | L27      | GCC TAT <b>ACT AGT CAT ATG</b> GCA AAT ACT GGC<br>TGT TTA TCA                       |
|                      | SRP14_low       | L28      | GCC TAT <b>CTC GAG GTT TTT CTT CGC TAC CTT GT</b>                                   |
| SRP21                | SRP21_up        | L29      | GCC TAT <b>ACT AGT CAT ATG TCT GTG AAA CCC ATT</b><br>GA                            |
|                      | SRP21_low       | L30      | GCC TAT <b>CTC GAG ACG CTT TTT TTT GCC CTT GT</b>                                   |
| SEC65                | Sec65_up        | L31      | GCC TAT <b>ACT AGT CAT ATG CCT AGA TTA GAA</b><br>GAG ATT GA                        |
|                      | Sec65_low       | L32      | GCC TAT <b>CTC GAG TCT TCT AAC TAC TTT GTA CTT</b><br>ATT TTT TGG T                 |
| SEC65<br>(pET19b)    | Sec65-pET_up    | L69      | GCC TAT <b>CTC GAG ATG CCT AGA TTA GAA GAG</b><br>ATT GAC GA                        |
|                      | Sec65-pET_low   | L70      | GCC TAT <b>GGA TCC TCA TCT TCT AAC TAC TTT GTA</b><br>CTT AT                        |
| SRP54                | SRP54_up        | L74      | GCC TAT <b>ACT AGT CAT ATG GTT TTG GCT GAT TTG</b><br>GGG A                         |
|                      | SRP74_low       | L75      | GCC TAT <b>CTC GAG GCC CAT ACC GAA TTG TTT TGC</b><br>CA                            |
| SRP68                | SRP68_up        | L76      | GCC TAT <b>ACT AGT CAT ATG GTT GCC TAT TCT CCA</b><br>ATC                           |
|                      | SRP68_low       | L77      | GCC TAT <b>CTC GAG ACG ACC AAA TAG GCC CA</b>                                       |

|                          |                                                    |                   |                                                                                                                                                                                                             |
|--------------------------|----------------------------------------------------|-------------------|-------------------------------------------------------------------------------------------------------------------------------------------------------------------------------------------------------------|
| SRP68<br>(pET19b)        | SRP68_up2<br>SRP68_low2                            | L78<br>L79        | GCC TAT <b>CTC GAG</b> <u>ATG GTT GCC TAT TCT CCA ATC</u><br>GCC TAT <b>GGA TCC</b> <u>ACG ACC AAA TAG GCC CA</u>                                                                                           |
| SRP72                    | SRP72_up<br>SRP72_low                              | L80<br>L81        | GCC TAT <b>ACT AGT CAT</b> <u>ATG GCT AAA GAT AAT</u><br><u>TTA ACT AAT TTG C</u><br>GCC TAT <b>CTC GAG</b> <u>TTT ACG GCC CTT CTT CTT GT</u>                                                               |
| SRP101                   | SRP101_up<br>SRP101_low                            | M21<br>M22        | GCC TAT <b>GGA TCC CAT</b> <u>ATG TTC GAC CAA TTA</u><br><u>GCA GTC T</u><br>GCC TAT <b>CTC GAG</b> <u>AGA CAT TAA TGT ATT AAC</u><br><u>AGC CCA</u>                                                        |
| SRP102                   | SRP102_up<br>SRP102_low                            | M23<br>M24        | GCC TAT <b>GGA TCC CAT</b> <u>ATG CTT AGT AAT ACA</u><br><u>CTT ATT ATT GCC T</u><br>GCC TAT <b>CTC GAG</b> <u>CAG TTT TTC ATC TAT CCA TTC</u><br>GC                                                        |
| SRP14<br>$\Delta$ 29Cter | P415HA_up<br>SRP14_low<br>SRP14d29_low             | M37<br>M38<br>M39 | GCC TAT <b>TCT AGA</b> <u>ATG TAC CCA TAC GAC GTC C</u><br>GCC TAT <b>CTC GAG</b> <u>TCA GTT TTT CTT CGC TAC CTT</u><br><u>GT</u><br>GCC TAT <b>CTC GAG</b> <u>TCA CAT GCC CCC CTT AAA TAC</u><br><u>AG</u> |
| SRP21<br>$\Delta$ 73Cter | SRP21_low<br>SRP21d273_low                         | M40<br>M41        | GCC TAT <b>CTC GAG</b> <u>TTA ACG CTT TTT TTT GCC CT</u><br>GCC TAT <b>CTC GAG</b> <u>TTA GTT ATT TTT CTT CTT CGA</u><br><u>CTG TGC</u>                                                                     |
| GFP &<br>mCherry         | GFP/mCherry+Xho<br>I-ed<br>GFP/mCherry_SalI<br>-ed | J22<br>J23        | GCC TAT <b>CTC GAG</b> <u>GGA GCA GGT GCT GGT</u><br>GCC TAT <b>GTC GAC TTA</b> <u>CTT GTA CAG CTC GTC CA</u>                                                                                               |

<sup>a</sup>The oligonucleotides that were used are as shown, where the regions of complementarity are underlined and restriction sites are shown in bold.

**Supplementary Table 2.** Constructs used in this study

| Name                           | Description                                                   | Source or reference |
|--------------------------------|---------------------------------------------------------------|---------------------|
| pMW295                         | <i>SRP21-SRP71-SEC65 (URA3/2<math>\mu</math>)</i>             | (1)                 |
| pMW299                         | <i>SCR1-SRP54-SRP68-SRP14 (LEU2/2<math>\mu</math>)</i>        | (1)                 |
| 2HA_p424                       | <i>2HA, ADH/CYC1 (TRP1/2<math>\mu</math>)</i>                 | (2)                 |
| 2HA-SRP14_p424                 | <i>2HA-SRP14,ADH/CYC1 (TRP1/2<math>\mu</math>)</i>            | This study          |
| 2HA-SRP21_p424                 | <i>2HA-SRP21,ADH/CYC1 (TRP1/2<math>\mu</math>)</i>            | This study          |
| 2HA-SEC65_p424                 | <i>2HA-SEC65,ADH/CYC1 (TRP1/2<math>\mu</math>)</i>            | This study          |
| 2HA-SRP54_p424                 | <i>2HA-SRP54,ADH/CYC1 (TRP1/2<math>\mu</math>)</i>            | This study          |
| 2HA-SRP68_p424                 | <i>2HA-SRP68,ADH/CYC1 (TRP1/2<math>\mu</math>)</i>            | This study          |
| 2HA-SRP72_p424                 | <i>2HA-SRP72,ADH/CYC1 (TRP1/2<math>\mu</math>)</i>            | This study          |
| 2HA-SRP101_p424                | <i>2HA-SRP101,ADH/CYC1 (TRP1/2<math>\mu</math>)</i>           | This study          |
| 2HA-SRP102_p424                | <i>2HA-SRP102,ADH/CYC1 (TRP1/2<math>\mu</math>)</i>           | This study          |
| p413                           | <i>ADH/CYC1 (HIS3/CEN)</i>                                    | ATCC (#87370)       |
| 2HA-SRP14 $\Delta$ 29Cter_p413 | <i>2HA-SRP14<math>\Delta</math>29Cter,ADH/CYC1 (HIS3/CEN)</i> | This study          |
| 2HA-SRP21 $\Delta$ 73Cter_p413 | <i>2HA-SRP21<math>\Delta</math>73Cter,ADH/CYC1 (HIS3/CEN)</i> | This study          |
| SRP14-GFP_p413                 | <i>SRP14-GFP, ADH/CYC1 (HIS3/CEN)</i>                         | This study          |
| SRP21-GFP_p413                 | <i>SRP21-GFP, ADH/CYC1 (HIS3/CEN)</i>                         | This study          |
| pET22b                         | <i>6HIS (AMP)</i>                                             | Novagen (#69744-3)  |
| SRP14_pET22b                   | <i>SRP14-6HIS (AMP)</i>                                       | This study          |
| SRP21_pET22b                   | <i>SRP21-6HIS (AMP)</i>                                       | This study          |
| SRP72_pET22b                   | <i>SRP72-6HIS (AMP)</i>                                       | This study          |
| SRP54_pET22b                   | <i>SRP54-6HIS (AMP)</i>                                       | This study          |
| SRP101_pET22b                  | <i>SRP101-6HIS (AMP)</i>                                      | This study          |

|                                      |                                                    |                    |
|--------------------------------------|----------------------------------------------------|--------------------|
| <i>SRP102_pET22b</i>                 | <i>SRP102-6HIS (AMP)</i>                           | This study         |
| <i>SRP14Δ29Cter_pET22b</i>           | <i>SRP14Δ29Cter-6HIS (AMP)</i>                     | This study         |
| <i>SRP21Δ73Cter_pET22b</i>           | <i>SRP21Δ73Cter-6HIS (AMP)</i>                     | This study         |
| <i>DED1_pET22b</i>                   | <i>DED1-6HIS (AMP)</i>                             | (3)                |
| <i>DED1-GAT_pET22b</i>               | <i>ded1-GAT-6HIS (AMP)</i>                         | (4)                |
| <i>pET19b</i>                        | <i>6HIS (AMP)</i>                                  | Novagen (#69677-3) |
| <i>SEC65_pET19b</i>                  | <i>6HIS-SEC65 (AMP)</i>                            | This study         |
| <i>SRP68_pET19b</i>                  | <i>6HIS-SRP68 (AMP)</i>                            | This study         |
| <i>p415</i>                          | <i>ADH/CYC1 (LEU2/CEN)</i>                         | ATCC (#87374)      |
| <i>pYM27-EGFP-KanMX4</i>             | <i>EGFP (KanMX4, AMP)</i>                          | Euroscarf (5)      |
| <i>GFP_p415</i>                      | <i>GFP, ADH/CYC1 (LEU2/CEN)</i>                    | This study         |
| <i>DED1-DQAD-GFP_p415</i>            | <i>DED1-DQAD-GFP, ADH/CYC1 (LEU2/CEN)</i>          | This study         |
| <i>GPD-p415</i>                      | <i>GPD/CYC1 (LEU2/CEN)</i>                         | ATCC (87358)       |
| <i>GPD-DED1_p415</i>                 | <i>GPD-DED1, GPD/CYC1 (LEU2/CEN)</i>               | This study         |
| <i>GPD-DED1-F162C_p415</i>           | <i>GPD-DED1-F162C, GPD/CYC1 (LEU2/CEN)</i>         | This study         |
| <i>DED1_YCplac111</i>                | <i>DED1 (LEU2/CEN)</i>                             | (6)                |
| <i>p416</i>                          | <i>ADH/CYC1 (URA3/CEN)</i>                         | ATCC (#87376)      |
| <i>pFA6a-mCherry-NatNT2 (PFM699)</i> | <i>mCherry, (NatNT2, AMP)</i>                      | Addgene (74636)(7) |
| <i>MCHERRY_p416</i>                  | <i>mCherry, ADH/CYC1 (URA3/CEN)</i>                | This study         |
| <i>ded1-DQAD-mCh p416</i>            | <i>DED1-DQAD-mCherry, ADH/CYC1 (URA3/CEN)</i>      | This study         |
| <i>KAR2-RFP_YIplac204</i>            | <i>TKC-DsRedExpress2-HDEL, TPI/CYC1 (TRP1/Int)</i> | Addgene (#21770)   |
| <i>p414</i>                          | <i>ADH/CYC1 (TRP1/CEN)</i>                         | ATCC (#87372)      |
| <i>DED1_p414</i>                     | <i>DED1, ADH/CYC1 (TRP1/CEN)</i>                   | This study         |
| <i>ded1-F162C_p414</i>               | <i>ded1-F162C, ADH/CYC1 (TRP1/CEN)</i>             | This study         |
| <i>T7-SCR1_pUC18</i>                 | <i>SCR1 (AMP)</i>                                  | This study         |
| <i>T7-SCR1ΔAlu_pUC18</i>             | <i>SCR1ΔAlu (AMP)</i>                              | This study         |
| <i>T7-SCR1ΔS1_pUC18</i>              | <i>SCR1ΔS1 (AMP)</i>                               | This study         |
| <i>T7-Actin_BS</i>                   | <i>preACTIN (AMP)</i>                              | (8)                |

**Supplementary Table 3.** Yeast and bacterial strains used in this study

| Name                            | Strain         | Genotype                                                                 | Source or reference                 |
|---------------------------------|----------------|--------------------------------------------------------------------------|-------------------------------------|
| <i>Saccharomyces cerevisiae</i> |                |                                                                          |                                     |
| BY4742                          | BY4742         | <i>MATα his3Δ1 leu2Δ0 ura3Δ0 lys2Δ1</i>                                  | Euroscarf                           |
| G50                             | W303 corrected | <i>MATα ura3-1 trp1-1 leu2-3,112 his3-11,15 can1-100 RAD5 ADE2</i>       | Gift from M. Lisby and R. Rothstein |
| <i>TET-SRP21</i>                | TH_4909        | <i>pSRP21::kanR-tet07-TATA URA3::CMV-tTA MATα his3-1 leu2-0 met15-0</i>  | Dharmacon                           |
| <i>TET-SRP14</i>                | TH_4306        | <i>pSRP14::kanR-tet07-TATA URA3::CMV-tTA MATα his3-1 leu2-0 met15-0</i>  | Dharmacon                           |
| <i>TET-SEC65</i>                | TH_6981        | <i>pSEC65::kanR-tet07-TATA URA3::CMV-tTA MATα his3-1 leu2-0 met15-0</i>  | Dharmacon                           |
| <i>TET-SRP68</i>                | TH_3180        | <i>pSRP68::kanR-tet07-TATA URA3::CMV-tTA MATα his3-1 leu2-0 met15-0</i>  | Dharmacon                           |
| <i>TET-SRP72</i>                | TH_3294        | <i>pSRP72::kanR-tet07-TATA URA3::CMV-tTA MATα his3-1 leu2-0 met15-0</i>  | Dharmacon                           |
| <i>TET-SRP101</i>               | TH_7193        | <i>pSRP101::kanR-tet07-TATA URA3::CMV-tTA MATα his3-1 leu2-0 met15-0</i> | Dharmacon                           |
| <i>GFP-SRP14</i>                | BY4741         | <i>MATα his3Δ1 leu2Δ0 met15Δ0 ura3Δ0 SRP14-GFP::HIS3MX6</i>              | Life Technologies                   |

|                                |                      |                                                                                                                                                                |                                     |
|--------------------------------|----------------------|----------------------------------------------------------------------------------------------------------------------------------------------------------------|-------------------------------------|
| <i>GFP-SRP21</i>               | BY4741               | <i>MATa his3Δ1 leu2Δ0 met15Δ0 ura3Δ0 SRP21-GFP::HIS3MX7</i>                                                                                                    | Life Technologies                   |
| <i>xpo1-T539C</i>              | MNY8                 | <i>MATa, ΔCRM1::KANr leu2- his3- trp1- ura3- &lt; pDC-XPO1T539C-LEU2/CEN &gt;</i>                                                                              | (9)                                 |
| <i>ded1Δ</i>                   | W303                 | <i>MATα ura3-1 ade2-1 leu2-3,112 trp1-1 DED1/ded1::HIS3MX6 &lt;Ded1/yCPlac33-ura3&gt;</i>                                                                      | (3)                                 |
| <i>sec61-ts</i>                | RDM 15-5B            | <i>MATα sec61-2, pep4-3, ura3-52, leu2-3,-112, ade2-1</i>                                                                                                      | (10)                                |
| <i>sec62-ts</i>                | RDM 50-94C           | <i>MATα sec62-1, ura3-52, leu2-3,112, his4, suc+/-</i>                                                                                                         | (10)                                |
| <i>KAR2-RFP in sec 61-ts</i>   | <i>sec61-ts</i>      | <i>MATα sec61-2, pep4-3, ura3-52, leu2-3,-112, ade2-1 trp1-1::DsRedExpress2-HDEL-TRP</i>                                                                       | This study                          |
| <i>KAR2-RFP in sec 62-ts</i>   | <i>sec62-ts</i>      | <i>MATα sec62-1, ura3-52, leu2-3,112, his4, suc+/- trp1-1::DsRedExpress2-HDEL-TRP</i>                                                                          | This study                          |
| <i>G49</i>                     | W303 corrected       | <i>MATa ura3-1 trp1-1 leu2-3,112 his3-11,15 can1-100 RAD5 ADE2</i>                                                                                             | Gift from M. Lisby and R. Rothstein |
| <i>KAR2-RFP in G49</i>         | W303 corrected (G49) | <i>MATa ura3-1trp1-1 leu2-3,112 his3-11,15 can1-100 RAD5 ADE2 trp1-1::DsRedExpress2-HDEL-TRP</i>                                                               | This study                          |
| <b><i>Escherichia coli</i></b> |                      |                                                                                                                                                                |                                     |
| Rosetta (DE3)                  | 70954                | <i>F- ompT hsdSB(rB- mB-) gal dcm</i>                                                                                                                          | Novagen                             |
| DH5α                           | DH5α                 | <i>F' φ80lacZΔM15 Δ(lacZYA-argF)U169 recA1 endA1 hsdR17(r<sub>K</sub><sup>-</sup>, m<sub>K</sub><sup>+</sup>) phoA supE44 λ<sup>-</sup> thi-1 gyrA96 relA1</i> | New England Biolabs                 |

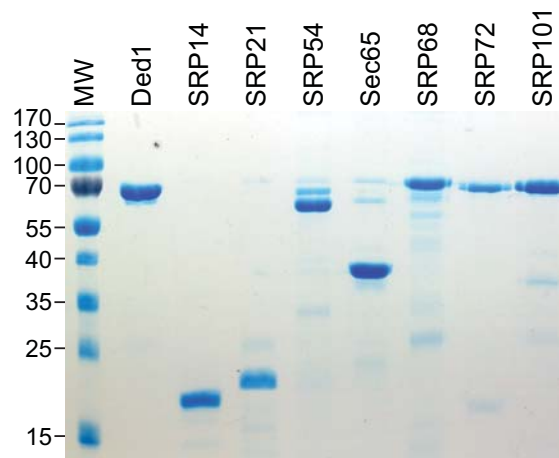

**Supplementary Figure 1.** Purified His-tagged recombinant proteins. Aliquots of 1.3 μg of proteins purified on a Ni-NTA column were electrophoretically separated on a 12% PAGE and stained with Coomassie blue.

## REFERENCES

1. Willer, M., Jermy, A.J., Steel, G.J., Garside, H.J., Carter, S. and Stirling, C.J. (2003) An *in vitro* assay using overexpressed yeast SRP demonstrates that cotranslational translocation is dependent upon the J-domain of Sec63p. *Biochemistry*, **42**, 7171-7177. 10.1021/bi0343951
2. Tanner, N.K., Cordin, O., Banroques, J., Doere, M. and Linder, P. (2003) The Q motif: a newly identified motif in DEAD box helicases may regulate ATP binding and hydrolysis. *Mol Cell*, **11**, 127-138. 10.1016/s1097-2765(03)00006-6
3. Iost, I., Dreyfus, M. and Linder, P. (1999) Ded1p, a DEAD-box protein required for translation initiation in *Saccharomyces cerevisiae*, is an RNA helicase. *J Biol Chem*, **274**, 17677-17683. 10.1074/jbc.274.25.17677
4. Cordin, O., Tanner, N.K., Doere, M., Linder, P. and Banroques, J. (2004) The newly discovered Q motif of DEAD-box RNA helicases regulates RNA-binding and helicase activity. *EMBO J*, **23**, 2478-2487. 10.1038/sj.emboj.7600272
5. Janke, C., Magiera, M.M., Rathfelder, N., Taxis, C., Reber, S., Maekawa, H., Moreno-Borchart, A., Doenges, G., Schwob, E., Schiebel, E. *et al.* (2004) A versatile toolbox for PCR-based tagging of yeast genes: new fluorescent proteins, more markers and promoter substitution cassettes. *Yeast*, **21**, 947-962. 10.1002/yea.1142
6. de la Cruz, J., Iost, I., Kressler, D. and Linder, P. (1997) The p20 and Ded1 proteins have antagonistic roles in eIF4E-dependent translation in *Saccharomyces cerevisiae*. *Proc Natl Acad Sci USA*, **94**, 5201-5206. 10.1073/pnas.94.10.5201
7. Malcova, I., Farkasovsky, M., Senohrabkova, L., Vasicova, P. and Hasek, J. (2016) New integrative modules for multicolor-protein labeling and live-cell imaging in *Saccharomyces cerevisiae*. *FEMS Yeast Res*, **16**. 10.1093/femsyr/fow027
8. Lin, R.J., Newman, A.J., Cheng, S.C. and Abelson, J. (1985) Yeast mRNA splicing *in vitro*. *J Biol Chem*, **260**, 14780-14792.
9. Neville, M. and Rosbash, M. (1999) The NES-Crm1p export pathway is not a major mRNA export route in *Saccharomyces cerevisiae*. *EMBO J*, **18**, 3746-3756. 10.1093/emboj/18.13.3746
10. Deshaies, R.J. and Schekman, R. (1987) A yeast mutant defective at an early stage in import of secretory protein precursors into the endoplasmic reticulum. *J Cell Biol*, **105**, 633-645. 10.1083/jcb.105.2.633
